# Supplementary material for: Bridge editing of spin-flip emitters gives insight into excited state energies and dynamics
Source: Royal Society of Chemistry journal article supplement (doi:10.1039/d4sc05860g), 2024-01-01
Supplement: d4sc05860g1.pdf [file d4sc05860g1.pdf]

## Supplementary Information

### Bridge Editing of Spin-Flip Emitters gives Insight into Excited State Energies and Dynamics

Florian Reichenauer,<sup>a</sup> Robert Naumann,<sup>a</sup> Christoph Förster,<sup>a</sup> Winald R. Kitzmann,<sup>a</sup> Antti-Pekka M. Reponen,<sup>b</sup> Sascha Feldmann<sup>b</sup> and Katja Heinze<sup>\*a</sup>

<sup>a</sup> Department of Chemistry, Johannes Gutenberg University Mainz, Duesbergweg 10-14, 55128 Mainz, Germany

<sup>b</sup> Rowland Institute, Harvard University, 100 Edwin H. Land Boulevard, Cambridge, MA 02142

|                                                 |     |
|-------------------------------------------------|-----|
| General Methods                                 | S2  |
| Synthetic Procedures                            | S5  |
| Analytical data of the ligands and Cr precursor | S9  |
| Analytical and DFT/TDDFT data of Cr complexes   | S18 |
| Computational studies on the doublet energies   | S37 |
| Computational studies on the quartet states     | S44 |
| fs-Transient absorption spectroscopy            | S45 |
| Variable-temperature emission spectroscopy      | S49 |
| Photolysis Experiments                          | S52 |
| Quenching Experiments                           | S54 |
| References                                      | S57 |

## General Methods

All reactions and measurements were performed under argon atmosphere unless otherwise noted. Gloveboxes (UniLab/MBraun – Ar 5.0, O<sub>2</sub> < 1 ppm, H<sub>2</sub>O < 0.1 ppm) were used to store and weight sensitive compounds for synthesis as well as to prepare samples that require the absence of oxygen and/or water. The reagents were purchased from commercial suppliers (Acros Organics, Alfa Aesar, Fischer Scientific and Sigma Aldrich) and used without further purification. Acetonitrile and petroleum ether were dried and distilled from CaH<sub>2</sub>. Anhydrous DMF (Sigma Aldrich) was used without further purification. Column chromatography was performed using aluminum oxide (neutral, Brockmann I). Analytical thin layer chromatography (TLC) was done on aluminum oxide F254 (Macherey-Nagel, coated on polyester sheets) and the spots were visualised by ultraviolet light.

**NMR Spectra** were recorded on a *Bruker Avance II 400* spectrometer at 400.42 MHz (<sup>1</sup>H) and 100.70 MHz (<sup>13</sup>C{<sup>1</sup>H}) in deuterated acetonitrile (Deutero GmbH). All data were evaluated with the software *MestReNova 12.0.4-22023*. The resonances are reported in ppm versus the solvent signal as internal standard (<sup>1</sup>H; (<sup>13</sup>C) NMR: acetonitrile-*d*<sub>3</sub>: δ = 1.94, 2.13; (1.32, 118.26) ppm)<sup>1</sup> and *J* values are given in Hz. (s) = singlet, (d) = doublet, (t) = triplet, (q) = quartet.

**IR spectra** were recorded with a *Bruker Alpha FTIR* spectrometer with an ATR unit containing a diamond crystal.

**ESI<sup>+</sup> mass spectra** were recorded on an *Agilent 6545 HPLC-ESI-QTOF-MS* spectrometer.

**Elemental analyses** were performed by the central analytic service of the Department of Chemistry of the Johannes Gutenberg University Mainz using an *Elementar vario EL Cube* or by the Mikroanalytisches Labor Kolbe, c/o Fraunhofer Institut UMSICHT, Oberhausen, Germany.

**Electrochemical experiments** were carried out on a *BioLogic SP-200* voltammetric analyser using platinum wires as counter and working electrodes and a 0.01 M Ag/Ag(NO<sub>3</sub>) electrode as reference electrode. Cyclic voltammetry and square wave measurements were carried out at scan rates of 100 mV s<sup>-1</sup> using 0.1 M [<sup>n</sup>Bu<sub>4</sub>N][PF<sub>6</sub>] in CH<sub>3</sub>CN as supporting electrolyte. Potentials are referenced against the ferrocenium/ferrocene couple.

**UV/VIS/NIR spectra** were recorded on an *Agilent Cary 5000* spectrometer using gastight 1.00 cm quartz cuvettes with a Schott valve. Measurements were carried out in acetonitrile (Optima® LC/MS grade, Fisher Scientific). Molar absorption coefficients are given at maximum absorption and for shoulders (highlighted as sh). For deconvolution of NIR absorption band patterns, the spectra were baseline corrected using a biexponential function (eq. S1) to model the tailing of higher energy bands. Deconvolution of the baseline corrected spectra was achieved with five Voigt functions using the *Origin94* software package.

$$\varepsilon(\tilde{\nu}) = \varepsilon_0 + A_1 e^{\frac{\tilde{\nu}-\tilde{\nu}_0}{\tau_1}} + A_2 e^{\frac{\tilde{\nu}-\tilde{\nu}_0}{\tau_2}} \quad (\text{eq. S1})$$

**Steady-state emission spectra and photoluminescent decay curves** of the complexes were measured with a *FLS1000 spectrometer* from *Edinburgh Instruments* equipped with a cooled photomultiplier detector PMT-980. A xenon arc lamp Xe2 (450 W) was used for excitation in steady-state measurements. Time-resolved luminescence experiments were conducted using a pulsed diode laser VPL-450 as excitation source. Absolute luminescence quantum yields  $\Phi$  were determined using an integrating sphere from *Edinburgh Instruments* with a relative uncertainty estimated as ±10%. Room temperature measurements were done in acetonitrile (Optima® LC/MS grade, Fisher Scientific). Measurements at low temperature were carried out using a liquid nitrogen cooled cryostat *Optistat DN* from *Oxford Instruments* in a 2:3 mixture of methanol (Optima® LC/MS grade) and ethanol (Fisher Scientific). Biexponential Arrhenius fits were performed for the entire measured temperature range on basis of eq. 1 (see main text) justified by the absent phase transition of the solvent mixture.<sup>2</sup> Emission spectra of the ligands were measured with a *spectrofluorometer FS5* from *Edinburgh Instruments*.

**fs-Transient absorption spectra** were recorded using a setup based on modules supplied by *Light Conversion*. The seed laser of the setup (*Light Conversion PHAROS*, Yb:KGW lasing medium) generates 1030 nm pulses with energy 400 μJ and duration 200 fs at a repetition rate of 50 kHz. The pump beam was generated from the seed in a harmonic generation unit (*Light Conversion HIRO*) via nonlinear crystals (beta-barium borate, lithium triborate) with residual fundamental removed by dichroic mirrors within the unit. The pump was passed through an optical chopper (operating at 100 Hz) and a beamsplitter/photodiode combination was used to divide and sort the measurements into pumped and unpumped. The pump was focused onto the sample with an effective beam diameter of roughly 900 μm. The probe beam was generated from the seed laser using supercontinuum generation in a sapphire crystal. The pump-probe delay was controlled over a range of 8 ns by changing probe path length via a multipass delay stage. For changing the wavelength region of the generated probe, the seed can be passed through a second harmonic generating medium prior to focusing onto the sapphire. Residual fundamental was filtered out and the white light probe was then focused onto the sample with an effective beam diameter of roughly 400 μm. The probe beam was passed into a grating spectrograph (*Andor Kymera 193i*, grating blaze wavelength 800 nm, 150 lines/mm for VIS-NIR probe and 300 nm, 300 lines/mm for UV-VIS probe) and recorded using a Si NMOS photodiode array detector (256 pixels). A 343 nm pump and 515 nm pump with fluences of 70 μJ cm<sup>-2</sup> and 3 mJ cm<sup>-2</sup> were used for [<sup>1</sup>O][OTf]<sub>3</sub> and [<sup>1</sup>S][OTf]<sub>3</sub>, respectively, with a repetition rate of 1 kHz. Experiments were carried out using a probe generated with 1030 nm fundamental, spanning 500 to 920 nm. The probe pulse arrival time has slight wavelength dependence (roughly 0.5 ps from lowest to highest wavelength), which is

corrected for by applying a wavelength-dependent time offset determined by a polynomial fit to selected points in the coherent artifact at time zero. Samples were measured in 1 mm path length cuvettes, with an OD of OD of 1.29 at 343 nm for  $[1^{\circ}][\text{OTf}]_3$  and an OD of 0.07 at 515 nm for  $[1^{\text{S}}][\text{OTf}]_3$ . No decomposition of the samples due to the TA experiments could be observed via UV/Vis absorption spectroscopy. Chirp correction and global analysis of the TA data using a consecutive kinetic model was performed using the KiMoPack python package.<sup>3</sup> For  $[1^{\text{S}}][\text{OTf}]_3$ , the data at time delays <0.5 ps was not included in the global analysis because of the strong artifacts around time zero. For  $[1^{\circ}][\text{OTf}]_3$ , the ultrafast component with a time constant of 0.03 ps does not carry any physical meaning as it is faster than the excitation pulse width of ca. 200 fs.

**Photolysis experiments** were conducted by irradiating deaerated stirred solutions of the complexes in inert gas cuvettes. An *Ultra-High Power* collimated LED from *Prizmatix* (UHP-T-460-DI; output power (free): 5.5 W) with a maximum at 456 nm and the centroid at 460 nm was used. The output power was adjusted constant with 1.1 W (20% setting) for all experiments using a *UHPTLCC-02-USB Controller*. The beam of light was focused onto the cuvette with a plano convex lens. At the cuvette, the beam diameter was roughly 1 cm. The temperature of the irradiated solution was kept at 20 °C with a Peltier module. Due to the excitation source being non-monochromatic, the complexes exhibiting a different spectral absorption within the excitation range and the absorbance changing over time upon irradiation, the irradiation and decomposition times of the different complexes are not comparable and only a qualitative comparison can be made.

**Stern-Volmer measurements** were conducted by titration of deaerated solutions of *trans*-stilbene or anthracene in acetonitrile to deaerated solutions of the corresponding complex in the same solvent in inert gas cuvettes. The titration steps were done in the glovebox. The Stern-Volmer analyses were performed on the basis of eq. S2 and S3.<sup>4</sup>

$$\frac{\tau_0}{\tau} - 1 = K_{SV}[Q] \quad (\text{eq. S2})$$

$$k_q = \frac{K_{SV}}{\tau_0} \quad (\text{eq. S3})$$

**DFT calculations** were performed using the quantum computing suite ORCA 5.0.4.<sup>5,6</sup> Geometry optimisation was performed using (un-)restricted Kohn-Sham orbitals DFT (UKS/RKS) and the B3LYP functional<sup>7-9</sup> in combination with Ahlrich's split valance triple-zeta basis set ZORA-def2-TZVPP<sup>10</sup> for all atoms. Tight convergence criteria were chosen for DFT calculations (keywords *tightscf* and *tightopt*). All DFT calculations make use of the resolution of identity (Split-RI-J) approach for the Coulomb term in combination with the chain-of-spheres approximation for the exchange term (keyword *RIJCOSX*).<sup>11,12</sup> The zeroth order regular approximation was used to describe relativistic effects in all calculations (keyword *ZORA*).<sup>13-19</sup> To account for solvent effects, a conductor-like screening model (keyword *CPCM*(acetonitrile)) modeling acetonitrile was used in all calculations.<sup>20,21</sup> Atom-pairwise dispersion correction was performed with the Becke-Johnson damping scheme (keyword *D3BJ*).<sup>22,23</sup> A numerical frequency calculation confirmed that the optimised geometry corresponds to a minimum structure. Explicit counter ions and/or solvent molecules were neglected. Fifty vertical spin-allowed transitions were calculated by TD-DFT. The charge transfer number analyses of the TD-DFT calculated transitions were done using TheoDORE 2.4.<sup>24</sup> Excited state geometry optimisations were done using TD-DFT and the given state was selected according to the TD-DFT calculation at the initial geometry (keyword *iroot*). To prevent root flipping after a step during the optimization the total overlap between the excited state wavefunctions was calculated and compared with the previous one (keyword *followiroot*). The characters of the optimised geometries were assigned to  $^4T_2$ ,  $^4\text{LMCT}$ ,  $^2T_1$  and  $^2E$  states according to the spin densities of the relaxed geometries. Starting from the optimised ground state geometries, distorted  $^4T_2$  and  $^4\text{LMCT}$  states (see main text) could be localised. All calculations were computed on the Elwetritsch supercomputer at RPTU Kaiserslautern-Landau (hpc.rz.rptu.de). This is a member of the AHRP (Alliance for High Performance Computing Rhineland-Palatinate).

**CASSCF(x,y)-SC-NEVPT2** calculations of ground and excited state properties with respect to pure metal-centered (MC) states were performed using the complete-active-space self-consistent field (CASSCF) method<sup>25,26</sup> in conjunction with the strongly contracted N-electron valence perturbation theory to second order (SC-NEVPT2)<sup>27-29</sup> in order to recover missing dynamic electron correlation. All electronic states are classified by irreducible representations of the O point group, in spite of the lower actual symmetry of the considered complexes. To figure out the dominant bonding/antibonding orbitals describing the interaction between chromium and the ligand, an active space screening procedure was performed by comparing the results of four different active spaces with the experimental values. The active space (7,12) comprising of five d-orbitals, two occupied  $\sigma$  bonding orbitals and five unoccupied d orbitals of second d-shell<sup>30</sup> give results closest to the experimental values and was considered for all other CASSCF-calculations. 10 quartet and 10 doublet roots were calculated for all CAS calculations.

Active spaces for the active space screening procedure of the CASSCF calculations:

|            |                                                                                                         |
|------------|---------------------------------------------------------------------------------------------------------|
| CAS(3,5)   | five d orbitals                                                                                         |
| CAS(3,10)  | five d orbitals + five unoccupied d orbitals of second d-shell                                          |
| CAS(13,10) | five d orbitals + five occupied $\sigma$ and $\pi$ bonding orbitals                                     |
| CAS(7,12)  | five d orbitals + two occupied $\sigma$ bonding orbitals + five unoccupied d orbitals of second d-shell |

**Crystal structure determinations.** Intensity data were collected with a *STOE IPDS-2T* diffractometer and a *STOE STADIVARI* diffractometer from STOE & CIE GmbH with an Oxford cooling using Mo-K $\alpha$  radiation ( $\lambda = 0.71073 \text{ \AA}$ ). The diffraction frames were integrated using the STOE X-Area software package<sup>31</sup> and were corrected for absorption with MULABS<sup>32</sup> of the PLATON<sup>33</sup> software package or with the X-Area software package<sup>31,34,35</sup> (integration or semi-empirical from equivalents). The structures were solved with SHELXT<sup>36</sup> and refined by the full-matrix method based on  $F^2$  using SHELXL<sup>37</sup> of the SHELX<sup>38</sup> software package and the ShelXle<sup>39</sup> graphical interface. All non-hydrogen atoms were refined anisotropically while the positions of all hydrogen atoms were generated with appropriate geometric constraints and allowed to ride on their respective parent atoms with fixed isotropic thermal parameters. Crystallographic data for the structures reported in this paper have been deposited with the Cambridge Crystallographic Data Centre as supplementary publication no. CCDC-2380708 for *btp*, CCDC-2380706 for **[1<sup>0</sup>][OTf]<sub>3</sub>** and CCDC-2380707 for **[1<sup>9</sup>][OTf]<sub>3</sub>**.

**Crystallographic Data of *btp*:** C<sub>15</sub>H<sub>11</sub>N<sub>3</sub>S<sub>2</sub> (297.39); monoclinic; *C2/c*;  $a = 12.378(3) \text{ \AA}$ ,  $b = 9.0617(18) \text{ \AA}$ ,  $c = 12.393(3) \text{ \AA}$ ;  $\alpha = 90^\circ$ ;  $\beta = 99.98(3)^\circ$ ;  $\gamma = 90^\circ$ ;  $V = 1369.0(5) \text{ \AA}^3$ ;  $Z = 4$ ; density, calcd. =  $1.443 \text{ g cm}^{-3}$ ,  $T = 120(2) \text{ K}$ ,  $\mu = 0.380 \text{ mm}^{-1}$ ;  $F(000) = 616$ ; crystal size  $0.820 \times 0.600 \times 0.480 \text{ mm}^3$ ;  $\theta = 3.338$  to  $27.841^\circ$ ;  $-16 \leq h \leq 14$ ,  $-11 \leq k \leq 11$ ,  $-16 \leq l \leq 16$ ; reflections collected = 3504; reflections unique = 1621 [ $R(\text{int}) = 0.0181$ ]; completeness to  $\theta = 25.242^\circ$ : 99.6%; absorption correction: integration; max. and min. transmission 0.8808 and 0.7687; data 1621; restraints 0, parameters 92; goodness-of-fit on  $F^2 = 1.055$ ; final indices [ $I > 2\sigma(I)$ ]  $R_1 = 0.0348$ ,  $wR_2 = 0.0905$ ;  $R$  indices (all data)  $R_1 = 0.0409$ ,  $wR_2 = 0.0948$ ; largest diff. peak and hole 0.419 and  $-0.284 \text{ e \AA}^{-3}$ .

**Crystallographic Data of **[1<sup>0</sup>][OTf]<sub>3</sub>**:** C<sub>33</sub>H<sub>24</sub>CrF<sub>9</sub>N<sub>6</sub>O<sub>14</sub>S<sub>3</sub> (1047.76); monoclinic; *P2<sub>1</sub>/n*;  $a = 15.110(3) \text{ \AA}$ ,  $b = 13.307(3) \text{ \AA}$ ,  $c = 19.705(4) \text{ \AA}$ ;  $\alpha = 90^\circ$ ;  $\beta = 98.83(3)^\circ$ ;  $\gamma = 90^\circ$ ;  $V = 3915.1(1) \text{ \AA}^3$ ;  $Z = 4$ ; density, calcd. =  $1.778 \text{ g cm}^{-3}$ ,  $T = 120(2) \text{ K}$ ,  $\mu = 0.573 \text{ mm}^{-1}$ ;  $F(000) = 2116$ ; crystal size  $0.260 \times 0.133 \times 0.070 \text{ mm}^3$ ;  $\theta = 2.395$  to  $28.175^\circ$ ;  $-19 \leq h \leq 19$ ,  $-17 \leq k \leq 17$ ,  $-18 \leq l \leq 26$ ; reflections collected = 31536; reflections unique = 9445 [ $R(\text{int}) = 0.0948$ ]; completeness to  $\theta = 25.242^\circ$ : 99.5%; absorption correction: semi-empirical from equivalents; max. and min. transmission 1.0905 and 0.8732; data 9445; restraints 1, parameters 601; goodness-of-fit on  $F^2 = 1.112$ ; final indices [ $I > 2\sigma(I)$ ]  $R_1 = 0.0570$ ,  $wR_2 = 0.1002$ ;  $R$  indices (all data)  $R_1 = 0.1019$ ,  $wR_2 = 0.1174$ ; largest diff. peak and hole 0.888 and  $-0.475 \text{ e \AA}^{-3}$ .

**Crystallographic Data of **[1<sup>9</sup>][OTf]<sub>3</sub>**:** C<sub>35.5</sub>H<sub>27</sub>CrF<sub>9</sub>N<sub>7</sub>O<sub>9.5</sub>S<sub>7</sub> (1151.06); monoclinic; *P2<sub>1</sub>/n*;  $a = 14.7224(3) \text{ \AA}$ ,  $b = 13.3391(3) \text{ \AA}$ ,  $c = 22.8690(5) \text{ \AA}$ ;  $\alpha = 90^\circ$ ;  $\beta = 93.810(2)^\circ$ ;  $\gamma = 90^\circ$ ;  $V = 4481.17(17) \text{ \AA}^3$ ;  $Z = 4$ ; density, calcd. =  $1.706 \text{ g cm}^{-3}$ ,  $T = 120(2) \text{ K}$ ,  $\mu = 0.682 \text{ mm}^{-1}$ ;  $F(000) = 2328$ ; crystal size  $0.380 \times 0.293 \times 0.160 \text{ mm}^3$ ;  $\theta = 2.062$  to  $31.145^\circ$ ;  $-19 \leq h \leq 20$ ,  $-18 \leq k \leq 19$ ,  $-30 \leq l \leq 32$ ; reflections collected = 84775; reflections unique = 13233 [ $R(\text{int}) = 0.0475$ ]; completeness to  $\theta = 25.242^\circ$ : 99.9%; absorption correction: semi-empirical from equivalents; max. and min. transmission 0.9168 and 0.0644; data 13233; restraints 139, parameters 793; goodness-of-fit on  $F^2 = 1.041$ ; final indices [ $I > 2\sigma(I)$ ]  $R_1 = 0.0420$ ,  $wR_2 = 0.1142$ ;  $R$  indices (all data)  $R_1 = 0.0618$ ,  $wR_2 = 0.1213$ ; largest diff. peak and hole 1.568 and  $-0.675 \text{ e \AA}^{-3}$ .

## Synthetic Procedures

### Synthesis of 2,6-bis(2-oxypyridin-1(2H)-yl)pyridine<sup>40</sup>

Potassium *tert*-butoxide (4.85 g, 43.2 mmol) was combined with an orange solution of 2-hydroxypyridine (4.11 g, 43.2 mmol) in anhydrous DMF (100 mL). The resulting brown solution was stirred for one hour at room temperature. 2,6-Dibromopyridine (5.12 g, 21.6 mmol) was added in portions and the mixture was heated at 145 °C for 24 hours. After cooling to room temperature, the solvent of the dark brown solution was removed under reduced pressure (5 mbar, 80 °C). The crude residue was suspended in water (100 mL) and the product was extracted with ethyl acetate (3 x 100 mL). The combined organic phases were washed with a saturated aqueous solution of sodium chloride (100 mL), dried with sodium sulfate and filtered. After removing the solvent under reduced pressure (200 mbar, 40 °C), the product was purified by column chromatography on alumina (3:1:0.05 ethyl acetate/methanol/triethylamine,  $R_f$  = 0.31) yielding the pale brown solid compound 2,6-bis(2-oxypyridin-1(2H)-yl)pyridine (4.19 g, 73%).

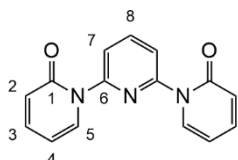

**<sup>1</sup>H NMR** (CD<sub>3</sub>CN):  $\delta$  = 8.05 (1 H, dd,  $^3J_{\text{HH}} = 8.4$ ,  $^3J_{\text{HH}} = 7.5$ , H<sup>8</sup>), 7.86 (2 H, d,  $^3J_{\text{HH}} = 7.9$ , H<sup>7</sup>), 7.84 (2 H, ddd,  $^3J_{\text{HH}} = 7.1$ ,  $^4J_{\text{HH}} = 2.1$ ,  $^5J_{\text{HH}} = 0.8$ , H<sup>5</sup>), 7.47 (2 H, ddd,  $^3J_{\text{HH}} = 9.4$ ,  $^3J_{\text{HH}} = 6.5$ ,  $^4J_{\text{HH}} = 2.1$ , H<sup>3</sup>), 6.52 (2 H, ddd,  $^3J_{\text{HH}} = 9.3$ ,  $^4J_{\text{HH}} = 1.3$ ,  $^5J_{\text{HH}} = 0.7$ , H<sup>2</sup>), 6.32 (2 H, ddd,  $^3J_{\text{HH}} = 7.1$ ,  $^3J_{\text{HH}} = 6.5$ ,  $^4J_{\text{HH}} = 1.3$ , H<sup>4</sup>) ppm.

**MS** (ESI<sup>+</sup>, CH<sub>3</sub>CN):  $m/z$  (%) = 266.09 (53) [M+H]<sup>+</sup>, 288.07 (100) [M+Na]<sup>+</sup>, 553.16 (59) [2 M+Na]<sup>+</sup>.

**IR** (ATR):  $\tilde{\nu}_{\text{max}}$  = 3119 (w), 3089 (w), 1659 (vs, C=O), 1598 (vs), 1576 (vs), 1537 (vs), 1443 (s), 1384 (s), 1289 (s), 1257 (s), 1243 (s), 1145 (s), 1127 (s), 1088 (w), 1007 (w), 991 (w), 880 (s), 854 (s), 815 (w), 779 (s), 763 (vs), 746 (s), 730 (w), 686 (w), 616 (w), 575 (s), 537 (w), 522 (s), 474 (w), 464 (w), 429 (w), 409 (w) cm<sup>-1</sup>.

### Synthesis of 2,6-bis(pyridin-2-yloxy)pyridine (bpop)

A solution of 2-bromopyridine (16.7 mL, 171 mmol) in anhydrous DMF (400 mL) was deaerated by purging with argon for half an hour and combined with 2,6-dihydroxypyridine hydrochloride (12.6 g, 85.4 mmol). Addition of potassium carbonate (35.4 g, 256 mmol) to the colourless solution yielded a deep blue suspension. The reaction mixture was heated at 145 °C for 24 hours. After cooling to room temperature, the blue suspension was filtered and the solvent was removed under reduced pressure (5 mbar, 80 °C). The crude residue was suspended in water (400 mL) and the product was extracted with ethyl acetate (3 x 200 mL). The combined organic phases were washed with a saturated aqueous solution of sodium chloride (200 mL), dried with sodium sulfate and filtered. After removing the solvent under reduced pressure (200 mbar, 40 °C), the product was purified by column chromatography on alumina (7:3:0.05 cyclohexane/ethyl acetate/triethylamine,  $R_f$  = 0.38) yielding the colourless solid ligand bpop (273 mg, 1.2%).

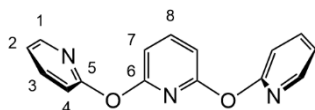

**Elemental analysis** calcd. for C<sub>15</sub>H<sub>11</sub>N<sub>3</sub>O<sub>2</sub>: C, 67.92; H, 4.18; N, 15.84. Found: C, 67.77; H, 4.42; N, 15.80.

**<sup>1</sup>H NMR** (CD<sub>3</sub>CN):  $\delta$  = 8.20 (2 H, ddd,  $^3J_{\text{HH}} = 5.0$ ,  $^4J_{\text{HH}} = 2.0$ ,  $^5J_{\text{HH}} = 0.8$ , H<sup>1</sup>), 7.89 (1 H, t,  $^3J_{\text{HH}} = 7.9$ , H<sup>8</sup>), 7.77 (2 H, ddd,  $^3J_{\text{HH}} = 8.2$ ,  $^3J_{\text{HH}} = 7.3$ ,  $^4J_{\text{HH}} = 2.0$ , H<sup>3</sup>), 7.13 (2 H, ddd,  $^3J_{\text{HH}} = 7.3$ ,  $^3J_{\text{HH}} = 4.9$ ,  $^4J_{\text{HH}} = 0.9$ , H<sup>2</sup>), 7.01 (2 H, dt,  $^3J_{\text{HH}} = 8.2$ ,  $^4J_{\text{HH}} = 0.9$ , H<sup>4</sup>), 6.86 (2 H, d,  $^3J_{\text{HH}} = 7.9$ , H<sup>7</sup>) ppm.

**<sup>13</sup>C{<sup>1</sup>H} NMR** (CD<sub>3</sub>CN):  $\delta$  = 162.6 (s, C<sup>5</sup>), 161.5 (s, C<sup>6</sup>), 148.8 (s, C<sup>1</sup>), 143.9 (s, C<sup>8</sup>), 140.8 (s, C<sup>3</sup>), 121.2 (s, C<sup>2</sup>), 114.6 (s, C<sup>4</sup>), 109.9 (s, C<sup>7</sup>) ppm.

**MS** (ESI<sup>+</sup>, CH<sub>3</sub>CN):  $m/z$  (%) = 266.09 (100) [M+H]<sup>+</sup>, 288.07 (6) [M+Na]<sup>+</sup>, 553.16 (2) [2 M+Na]<sup>+</sup>.

**IR** (ATR):  $\tilde{\nu}_{\text{max}}$  = 3057 (w), 3009 (w), 1585 (vs), 1567 (vs), 1468 (s), 1441 (s), 1414 (vs), 1286 (s), 1260 (s), 1206 (vs), 1142 (s), 1097 (w), 1075 (w), 1044 (w), 1006 (vs), 991 (vs), 870 (s), 847 (w), 776 (vs), 740 (s), 627 (w), 589 (w), 506 (w), 454 (w), 412 (s) cm<sup>-1</sup>.

**UV/Vis** (CH<sub>3</sub>CN):  $\lambda_{\text{max}}$  ( $\epsilon$ ) = 267 (11430), 215 (18070) nm (M<sup>-1</sup> cm<sup>-1</sup>).

**Emission** (CH<sub>3</sub>CN, room temperature):  $\lambda_{\text{max}}$  = 307 nm ( $\lambda_{\text{exc}}$  = 267 nm).

### Synthesis of 2,6-bis(pyridin-2-ylthio)pyridine<sup>41</sup> (bptp)

Potassium *tert*-butoxide (5.23 g, 46.6 mmol) was combined with a yellow solution of 2-mercaptopyridine (5.18 g, 46.6 mmol) in anhydrous DMF (100 mL). The resulting red solution was stirred for one hour at room temperature. 2,6-Dibromopyridine (5.52 g, 23.3 mmol) was added in portions and the mixture was heated at 145 °C for 24 hours. After cooling to room temperature, the solvent of the dark red solution was removed under reduced pressure (5 mbar, 80 °C). The crude residue was suspended in water (100 mL) and the product was extracted with ethyl acetate (3 x 100 mL). The combined organic phases were washed with a saturated aqueous solution of sodium chloride (100 mL), dried with sodium sulfate and filtered. After removing the solvent under reduced pressure (200 mbar, 40 °C), the product was purified by column chromatography on alumina (7:3:0.05 cyclohexane/ethyl acetate/triethylamine,  $R_f$  = 0.28) yielding the pale yellow solid ligand bptp (5.49 g, 79%).

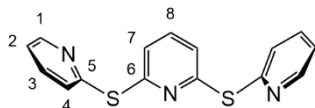

**Elemental analysis** calcd. for C<sub>15</sub>H<sub>11</sub>N<sub>3</sub>S<sub>2</sub>: C, 60.58; H, 3.73; N, 14.13. Found: C, 60.53; H, 3.95; N, 14.12.

**<sup>1</sup>H NMR** (CD<sub>3</sub>CN):  $\delta$  = 8.46 (2 H, ddd, <sup>3</sup>J<sub>HH</sub> = 4.8, <sup>4</sup>J<sub>HH</sub> = 1.9, <sup>5</sup>J<sub>HH</sub> = 0.9, H<sup>1</sup>), 7.62 (2 H, td, <sup>3</sup>J<sub>HH</sub> = 7.8, <sup>4</sup>J<sub>HH</sub> = 1.9, H<sup>3</sup>), 7.59 (1 H, t, <sup>3</sup>J<sub>HH</sub> = 7.8, H<sup>8</sup>), 7.40 (2 H, dt, <sup>3</sup>J<sub>HH</sub> = 8.0, <sup>4</sup>J<sub>HH</sub> = 1.0, H<sup>4</sup>), 7.27 (2 H, d, <sup>3</sup>J<sub>HH</sub> = 7.8, H<sup>7</sup>), 7.21 (2 H, ddd, <sup>3</sup>J<sub>HH</sub> = 7.5, <sup>3</sup>J<sub>HH</sub> = 4.8, <sup>4</sup>J<sub>HH</sub> = 1.1, H<sup>2</sup>) ppm.

**<sup>13</sup>C{<sup>1</sup>H} NMR** (CD<sub>3</sub>CN):  $\delta$  = 158.2 (s, C<sup>6</sup>), 156.7 (s, C<sup>5</sup>), 151.1 (s, C<sup>1</sup>), 139.2 (s, C<sup>8</sup>), 138.3 (s, C<sup>3</sup>), 127.2 (s, C<sup>4</sup>), 124.2 (s, C<sup>7</sup>), 123.2 (s, C<sup>2</sup>) ppm.

**MS** (ESI<sup>+</sup>, CH<sub>3</sub>CN):  $m/z$  (%) = 298.05 (100) [M+H]<sup>+</sup>, 320.03 (25) [M+Na]<sup>+</sup>, 617.07 (12) [2 M+Na]<sup>+</sup>.

**IR** (ATR):  $\tilde{\nu}_{\max}$  = 3042 (w), 2987 (w), 1708 (w), 1571 (s), 1544 (vs), 1448 (s), 1409 (vs), 1279 (w), 1236 (w), 1162 (s), 1141 (s), 1113 (vs), 1083 (s), 1044 (s), 985 (s), 885 (w), 787 (s), 756 (vs), 736 (s), 719 (vs), 655 (w), 618 (w), 593 (w), 514 (w), 461 (w), 420 (w) cm<sup>-1</sup>.

**UV/Vis** (CH<sub>3</sub>CN):  $\lambda_{\max}$  ( $\epsilon$ ) = 308 (10190), 285 (12600), 244 (16850) nm (M<sup>-1</sup> cm<sup>-1</sup>).

**Emission** (CH<sub>3</sub>CN, room temperature):  $\lambda_{\max}$  = 349 nm ( $\lambda_{\text{exc}}$  = 308 nm).

### Synthesis of chromium(III) triflate<sup>42</sup>

Trimethylsilyl trifluoromethanesulfonate (50.0 g, 225 mmol) was poured into a suspension of purple chromium(III) chloride (3.56 g, 22.5 mmol) in dried acetonitrile (150 mL) and the heterogeneous mixture was heated to 82 °C. To start the reaction, chromium(II) chloride (50.0 mg, 0.407 mmol) was added, changing the colour of the solution to green. Heating the reaction mixture at 82 °C for 24 hours yielded a green-blue solution. After cooling to room temperature, the solvent was removed under reduced pressure (180 mbar, 40 °C). The residue was washed with dry petroleum ether (3 x 50 mL) and dried under reduced pressure (8 x 10<sup>-3</sup> mbar) for three days. The absence of chloride ions in the green-blue chromium(III) triflate (11.1 g, 99%) was verified by a negative silver(I) salt precipitation with silver(I) triflate in dry acetonitrile.

**MS** (ESI<sup>+</sup>, CH<sub>3</sub>CN):  $m/z$  (%) = 431.90 (17) [M-OTf+2 CH<sub>3</sub>CN]<sup>+</sup>, 472.92 (5) [M-OTf+3 CH<sub>3</sub>CN]<sup>+</sup>, 513.95 (11) [M-OTf+4 CH<sub>3</sub>CN]<sup>+</sup>, 598.88 (16) [M+H<sub>2</sub>O+2 CH<sub>3</sub>CN]<sup>+</sup>, 639.91 (100) [M+H<sub>2</sub>O+3 CH<sub>3</sub>CN]<sup>+</sup>.

**IR** (ATR):  $\tilde{\nu}_{\max}$  = 1344 (vs), 1247 (w), 1234 (s), 1178 (vs), 987 (vs), 955 (vs), 824 (w), 767 (w), 624 (vs), 605 (vs), 571 (w), 534 (s), 515 (s), 423 (vs) cm<sup>-1</sup>.

**UV/Vis** (CH<sub>3</sub>CN):  $\lambda_{\max}$  ( $\epsilon$ ) = 706 (7.3), 592 (51), 430 (35), 311 (17), 222 (4920) nm (M<sup>-1</sup> cm<sup>-1</sup>).

### Synthesis of $[\text{Cr}(\text{bpop})_2][\text{OTf}]_3$ ( $[\mathbf{1}^{\text{O}}][\text{OTf}]_3$ )

A pale yellow solution of bpop (240 mg, 0.905 mmol) in dry acetonitrile (10 mL) was added dropwise to a green-blue solution of chromium(III) triflate (226 mg, 0.453 mmol) in dry acetonitrile (15 mL) without a colour change. Heating the reaction mixture at 82 °C for 2 hours yielded a red solution. After cooling to room temperature, the solvent was removed under reduced pressure (180 mbar, 40 °C) and the red residue was dried under reduced pressure ( $8 \times 10^{-3}$  mbar) for 24 hours. Washing the residue with THF (4 x 25 mL) by stirring for half an hour each time followed by decanting the solution, separated the yellow solid product from impurities in the red solution. The yellow powder was dried under reduced pressure ( $8 \times 10^{-3}$  mbar) and dissolved in acetonitrile (2.5 mL). Slow diffusion of cooled diethyl ether (fridge) into the concentrated acetonitrile solution resulted in yellow crystals of  $[\mathbf{1}^{\text{O}}][\text{OTf}]_3$  (113 mg, 24%) with diffraction quality.

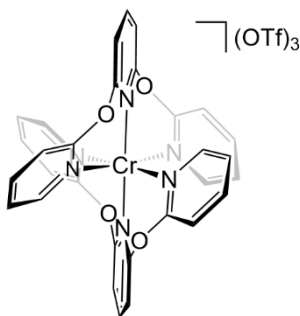

**Elemental analysis** calcd. for  $\text{C}_{33}\text{H}_{22}\text{CrF}_9\text{N}_6\text{O}_{13}\text{S}_3 \times 2 \text{H}_2\text{O}$ : C, 37.19; H, 2.46; N, 7.89; S, 9.02. Found: C, 37.18; H, 2.31; N, 7.90; S, 9.03.

**MS** (ESI<sup>+</sup>,  $\text{CH}_3\text{CN}$ ):  $m/z$  (%) = 194.04 (21)  $[\mathbf{1}^{\text{O}}]^{3+}$ , 365.53 (67)  $[\mathbf{1}^{\text{O}}+\text{OTf}]^{2+}$ , 880.01 (100)  $[\mathbf{1}^{\text{O}}+2 \text{OTf}]^+$ .

**IR** (ATR):  $\tilde{\nu}_{\text{max}}$  = 3119 (w), 3072 (w), 3034 (w), 1612 (vs), 1569 (s), 1483 (s), 1455 (s), 1441 (s), 1425 (vs), 1309 (s), 1240 (vs), 1224 (vs), 1154 (vs), 1108 (s), 1084 (w), 1064 (s), 1028 (vs), 1007 (vs) 871 (s), 846 (s), 789 (s), 755 (w), 729 (w), 677 (w), 658 (w), 636 (vs), 573 (s), 517 (s), 464 (w), 447 (w), 423 (w), 406 (w)  $\text{cm}^{-1}$ .

**UV/Vis** ( $\text{CH}_3\text{CN}$ ):  $\lambda_{\text{max}}$  ( $\epsilon$ ) = 737 (0.22), 716 (0.35), 689 (0.20), 463 (100), 369 (1640), 268 (17670, sh), 257 (19060), 238 (23480, sh) nm ( $\text{M}^{-1} \text{cm}^{-1}$ ).

**Emission** ( $\text{CH}_3\text{CN}$ , room temperature):  $\lambda_{\text{max}}$  = 741, 716 nm ( $\lambda_{\text{exc}}$  = 450 nm).

### Synthesis of $[\text{Cr}(\text{btp}_2)](\text{OTf})_3$ ( $[\mathbf{1}^{\text{S}}][\text{OTf}]_3$ )

A pale yellow solution of btp (530 mg, 1.78 mmol) in dry acetonitrile (20 mL) was added dropwise to a green-blue solution of chromium(III) triflate (445 mg, 0.891 mmol) in dry acetonitrile (30 mL) without a colour change. Heating the reaction mixture at 82 °C for 2 hours yielded a red solution. After cooling to room temperature, the solvent was removed under reduced pressure (180 mbar, 40 °C) and the red residue was dried under reduced pressure ( $8 \times 10^{-3}$  mbar) for 24 hours. Washing the residue with THF (4 x 50 mL) by stirring for half an hour each time followed by decanting the solution separated the yellow solid product from impurities in the red solution. The yellow powder was dried under reduced pressure ( $8 \times 10^{-3}$  mbar) and dissolved in acetonitrile (5.0 mL). Slow diffusion of cooled diethyl ether (fridge) into the concentrated acetonitrile solution resulted in yellow crystals of  $[\mathbf{1}^{\text{S}}][\text{OTf}]_3$  (304 mg, 31%) with diffraction quality.

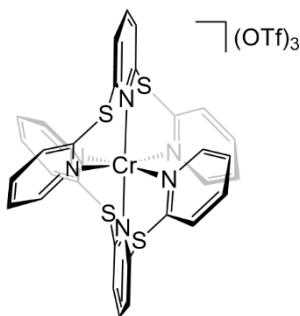

**Elemental analysis** calcd. for  $\text{C}_{33}\text{H}_{22}\text{CrF}_9\text{N}_6\text{O}_9\text{S}_7$ : C, 36.23; H, 2.03; N, 7.68; S, 20.51. Found: C, 36.13; H, 2.06; N, 7.66; S, 20.43.

**MS** (ESI<sup>+</sup>,  $\text{CH}_3\text{CN}$ ):  $m/z$  (%) = 215.34 (37)  $[\mathbf{1}^{\text{S}}]^{3+}$ , 397.49 (96)  $[\mathbf{1}^{\text{S}}+\text{OTf}]^{2+}$ , 943.92 (100)  $[\mathbf{1}^{\text{S}}+2 \text{OTf}]^+$ .

**IR** (ATR):  $\tilde{\nu}_{\text{max}}$  = 3107 (w), 3081 (w), 1593 (s), 1570 (s), 1560 (s), 1544 (w), 1469 (s), 1419 (s), 1378 (w), 1253 (vs), 1224 (vs), 1153 (vs), 1108 (w), 1092 (w), 1067 (w), 1028 (vs), 1009 (s), 808 (w), 776 (s), 756 (w), 739 (w), 725 (s), 690 (w), 636 (vs), 573 (s), 517 (s), 474 (w), 447 (w), 432 (w), 406 (w)  $\text{cm}^{-1}$ .

**UV/Vis** ( $\text{CH}_3\text{CN}$ ):  $\lambda_{\text{max}}$  ( $\epsilon$ ) = 724 (0.14, sh), 713 (0.43), 683 (0.22), 452 (1880), 426 (1560, sh), 353 (7000, sh), 321 (16290), 299 (18920, sh), 290 (20200), 225 (44560, sh) nm ( $\text{M}^{-1} \text{cm}^{-1}$ ).

**Emission** ( $\text{CH}_3\text{CN}$ , room temperature):  $\lambda_{\text{max}}$  = 727, 713 nm ( $\lambda_{\text{exc}}$  = 450 nm).



## Analytical data of the ligands and precursor

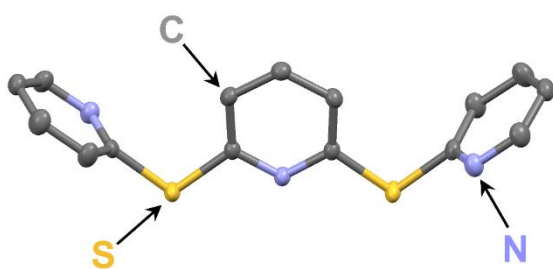

**Fig. S1** Molecular structure of bptp in the solid state. Hydrogen atoms omitted, thermal ellipsoids at 50% probability level.

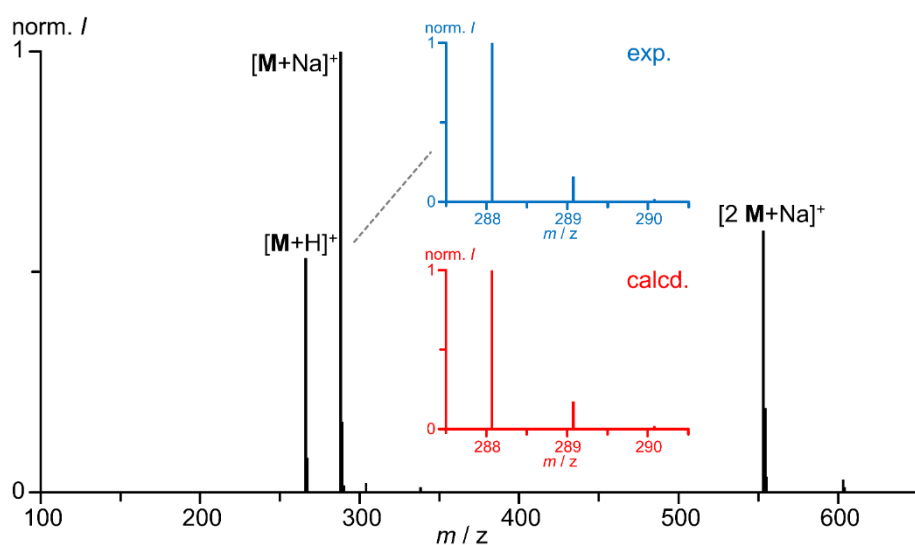

**Fig. S2** ESI<sup>+</sup> mass spectrum of 2,6-bis(2-oxopyridin-1(2H)-yl)pyridine in CH<sub>3</sub>CN with insets of the experimentally found (blue) and calculated (red) isotope pattern for [M+Na]<sup>+</sup> (C<sub>15</sub>H<sub>11</sub>N<sub>3</sub>NaO<sub>2</sub>).

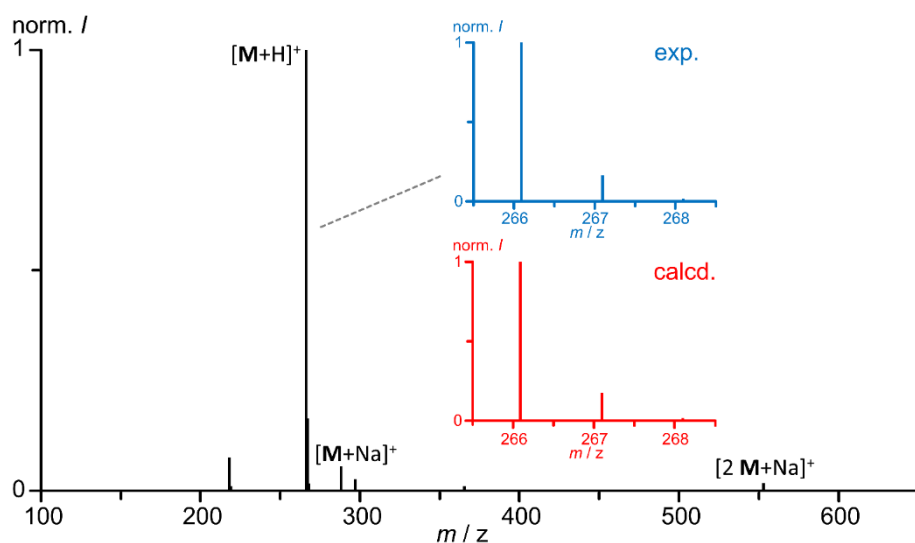

**Fig. S3** ESI<sup>+</sup> mass spectrum of bpop in CH<sub>3</sub>CN with insets of the experimentally found (blue) and calculated (red) isotope pattern for [M+H]<sup>+</sup> (C<sub>15</sub>H<sub>12</sub>N<sub>3</sub>O<sub>2</sub>).

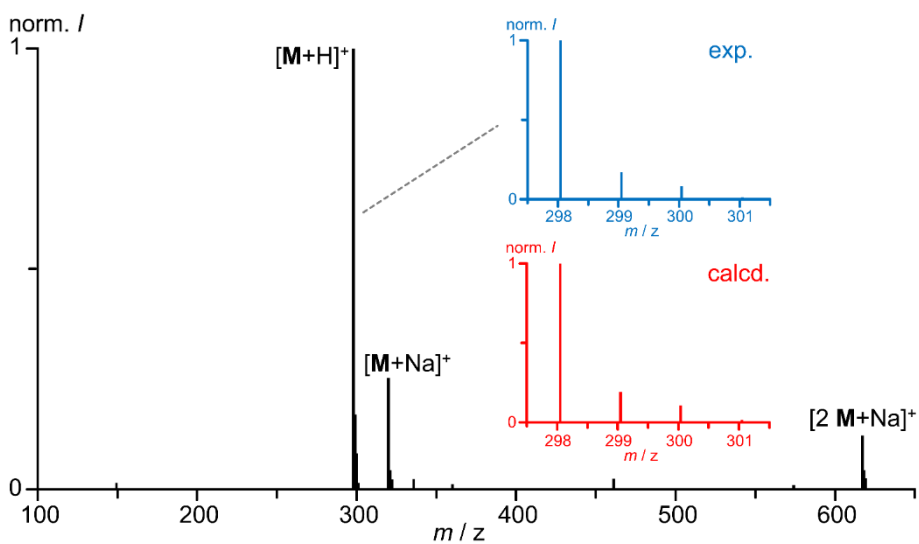

**Fig. S4** ESI<sup>+</sup> mass spectrum of btp in CH<sub>3</sub>CN with insets of the experimentally found (blue) and calculated (red) isotope pattern for [M+H]<sup>+</sup> (C<sub>15</sub>H<sub>12</sub>N<sub>3</sub>S<sub>2</sub>).

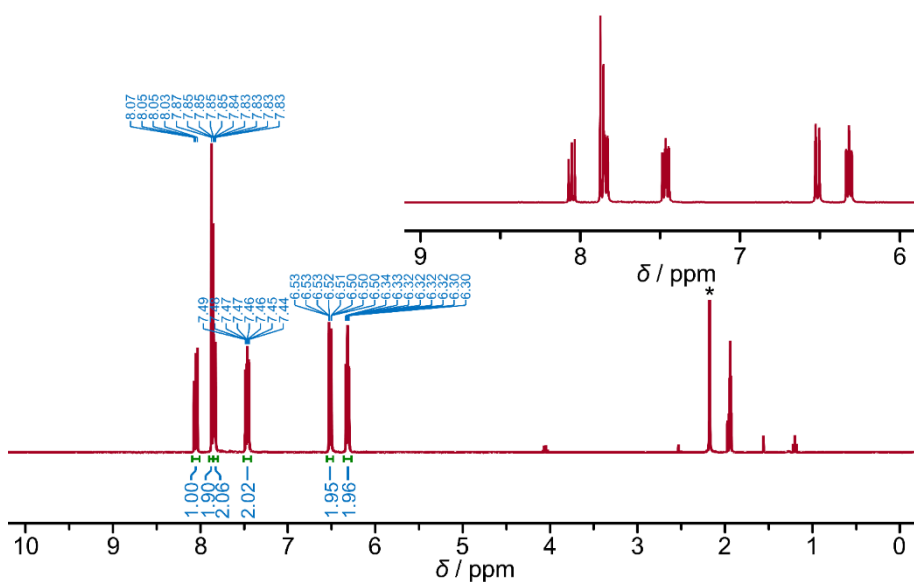

**Fig. S5** <sup>1</sup>H NMR spectrum of 2,6-bis(2-oxopyridin-1(2H)-yl)pyridine in CD<sub>3</sub>CN with inset of the aromatic region. The asterisk denotes the water peak.



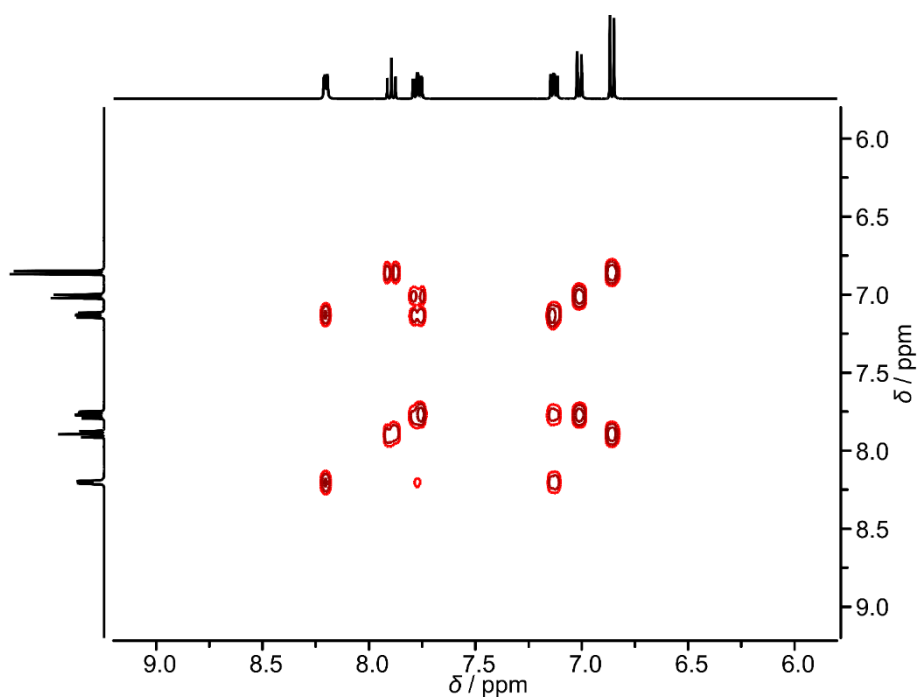

**Fig. S8**  $^1\text{H}, ^1\text{H}$  COSY of bpop in  $\text{CD}_3\text{CN}$ .

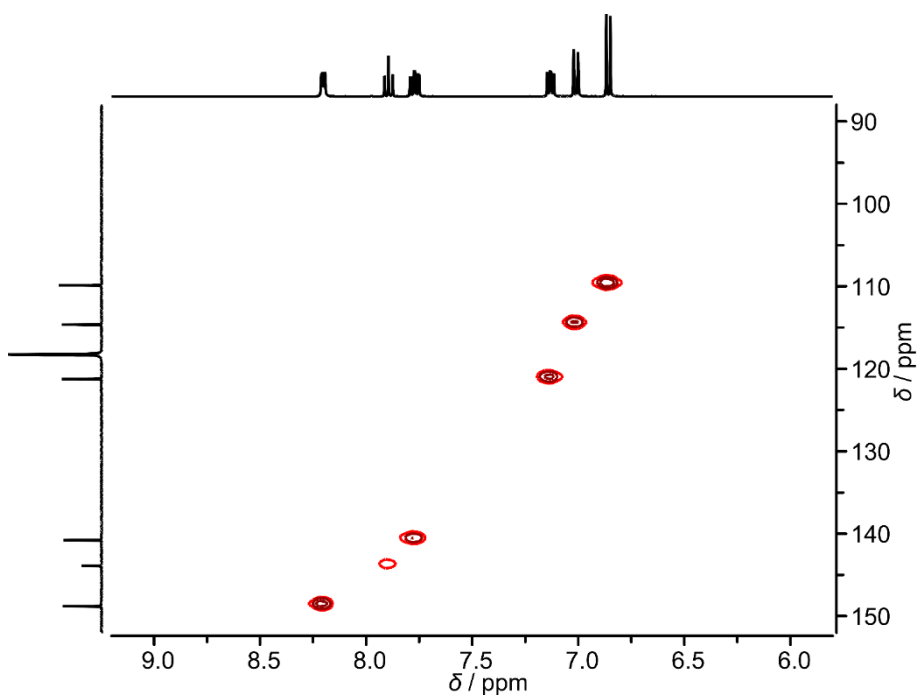

**Fig. S9**  $^{13}\text{C}, ^1\text{H}$  HSQC of bpop in  $\text{CD}_3\text{CN}$ .

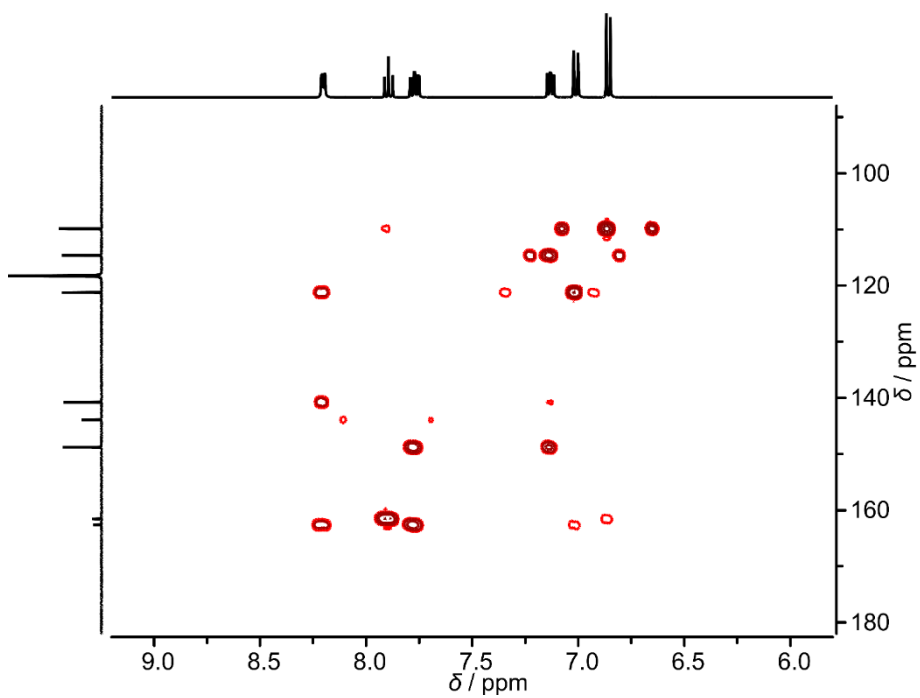

Fig. S10  $^{13}\text{C}, ^1\text{H}$  HMBC of bpop in  $\text{CD}_3\text{CN}$ .

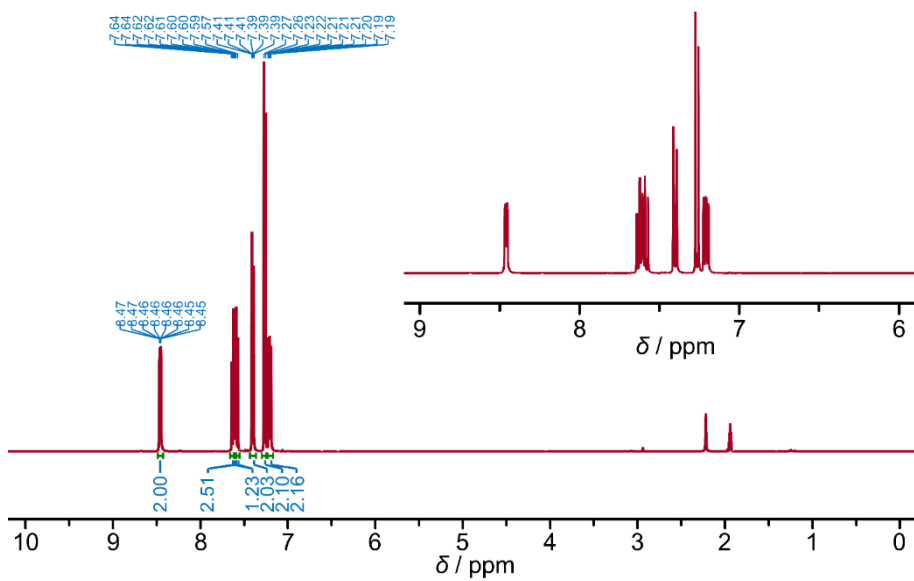

Fig. S11  $^1\text{H}$  NMR spectrum of bptp in  $\text{CD}_3\text{CN}$  with inset of the aromatic region.

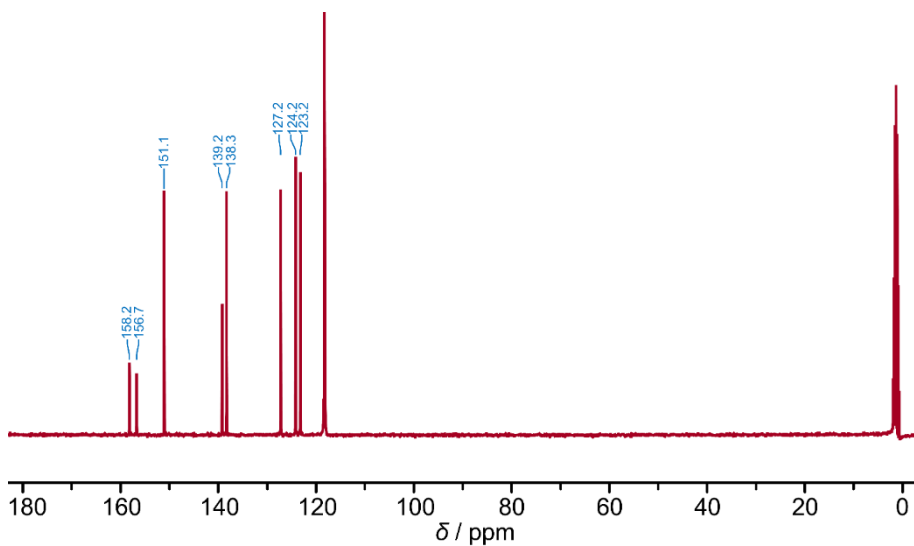

**Fig. S12**  $^{13}\text{C}\{^1\text{H}\}$  NMR spectrum of bptp in  $\text{CD}_3\text{CN}$ .

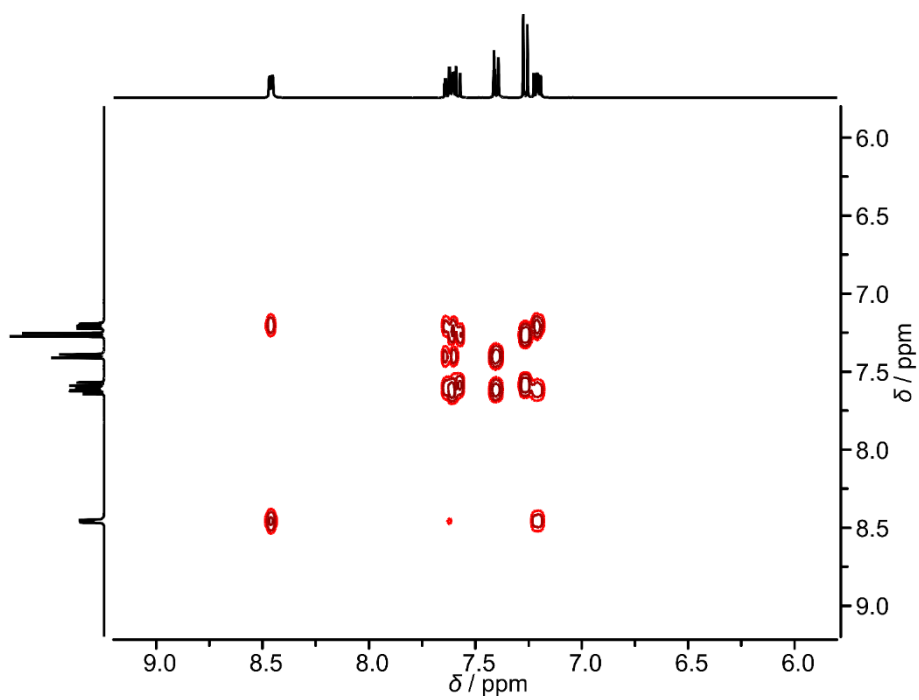

**Fig. S13**  $^1\text{H},^1\text{H}$  COSY of bptp in  $\text{CD}_3\text{CN}$ .

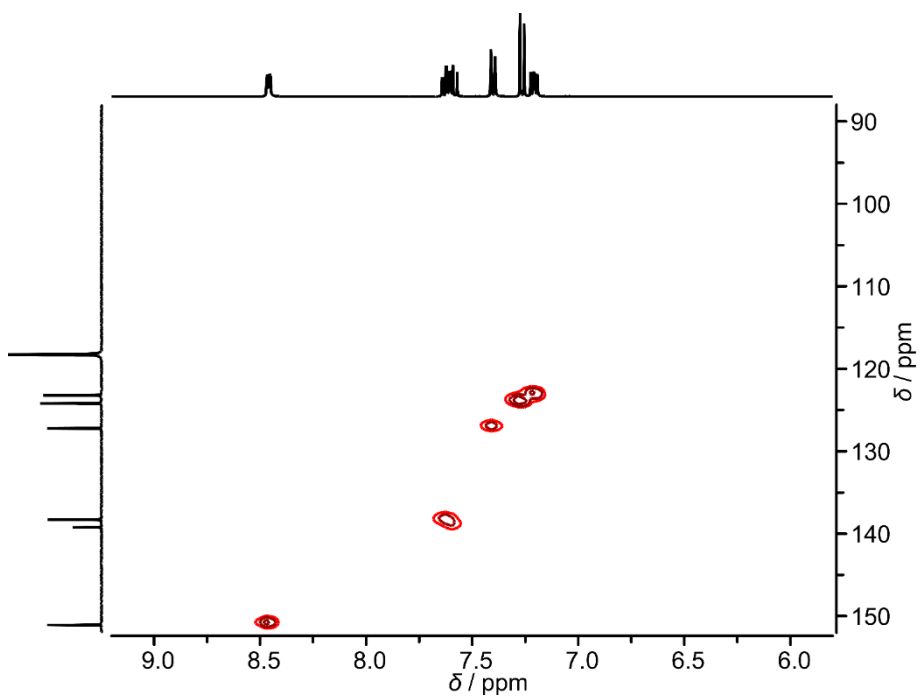

**Fig. S14**  $^{13}\text{C}, ^1\text{H}$  HSQC of bptp in  $\text{CD}_3\text{CN}$ .

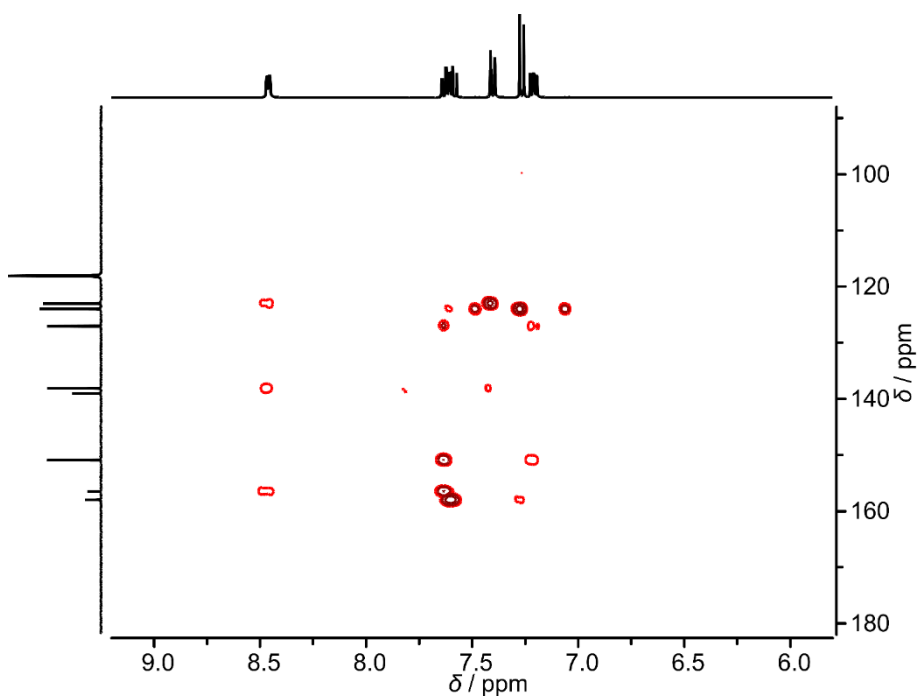

**Fig. S15**  $^{13}\text{C}, ^1\text{H}$  HMBC of bptp in  $\text{CD}_3\text{CN}$ .

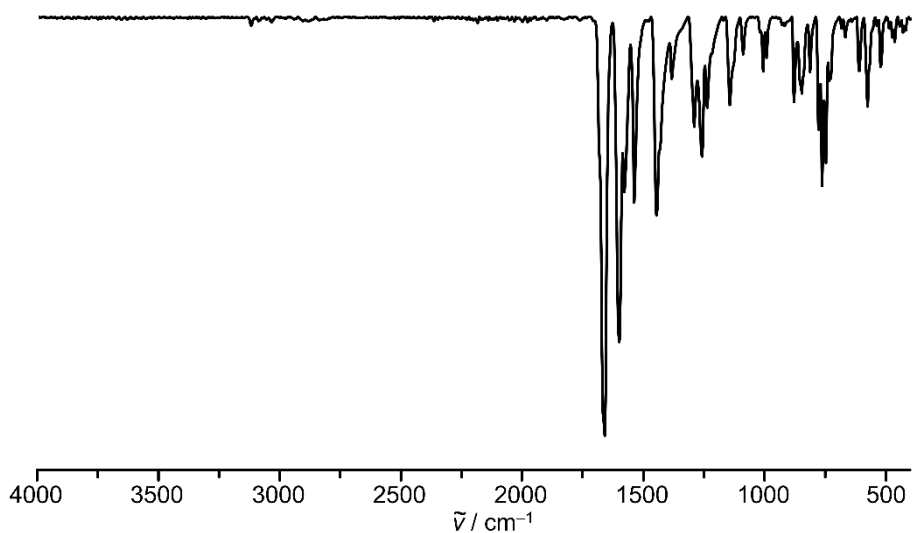

**Fig. S16** ATR-IR spectrum of 2,6-bis(2-oxopyridin-1(2H)-yl)pyridine.

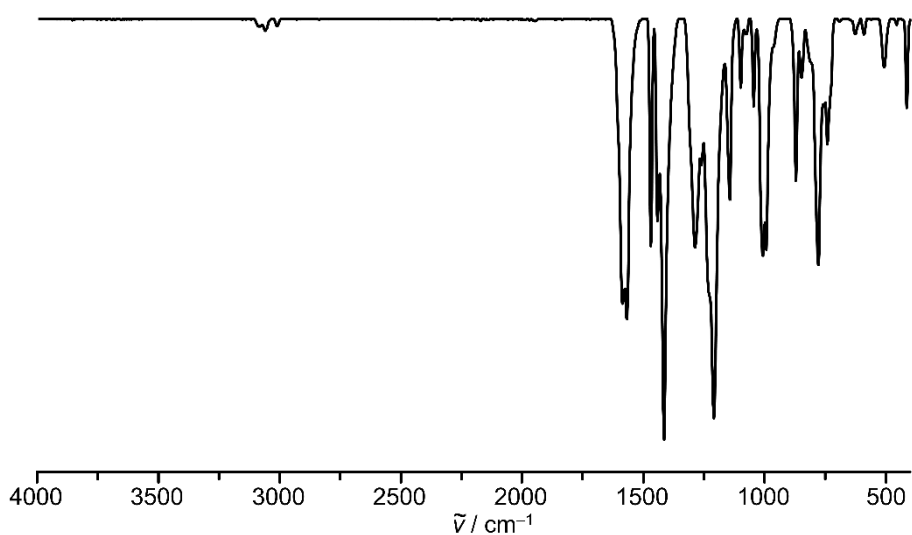

**Fig. S17** ATR-IR spectrum of bpop.

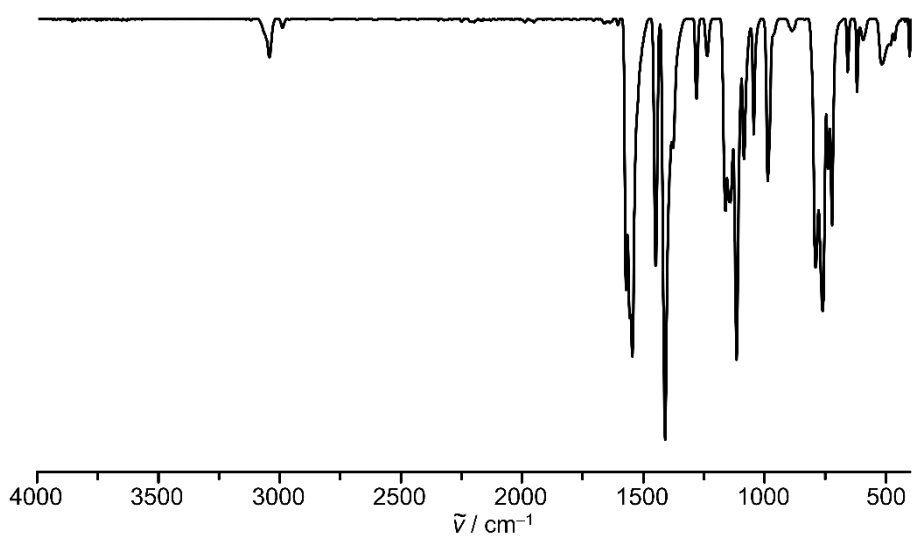

**Fig. S18** ATR-IR spectrum of btp.



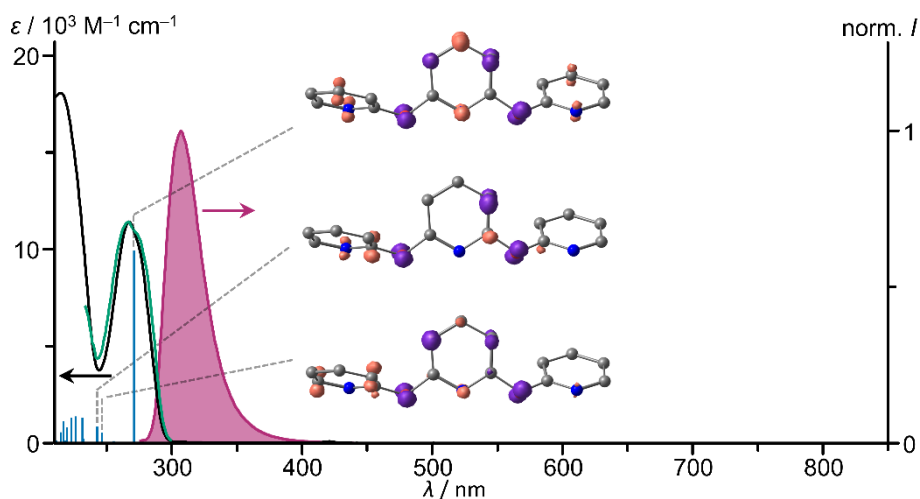

**Fig. S19** UV/VIS/NIR absorption spectrum (black), excitation spectrum ( $\lambda_{\text{em}} = 307$  nm, green) and emission spectrum ( $\lambda_{\text{exc}} = 267$  nm, purple) of bpop in deaerated acetonitrile at room temperature, TD-DFT calculated oscillator strengths (blue) and difference electron densities (isosurface value 0.01 a.u.) of three low energy transitions.

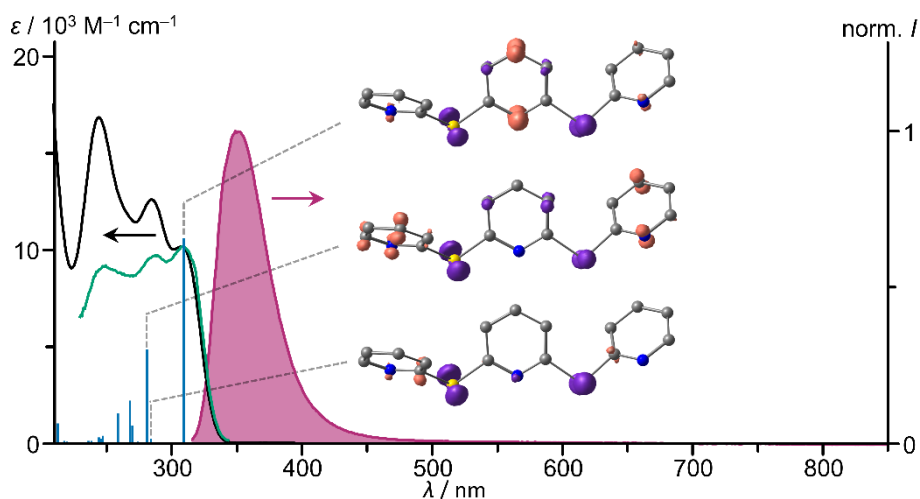

**Fig. S20** UV/VIS/NIR absorption spectrum (black), excitation spectrum ( $\lambda_{\text{em}} = 351$  nm, green) and emission spectrum ( $\lambda_{\text{exc}} = 308$  nm, purple) of bptp in deaerated acetonitrile at room temperature, TD-DFT calculated oscillator strengths (blue) and difference electron densities (isosurface value 0.01 a.u.) of three low energy transitions.

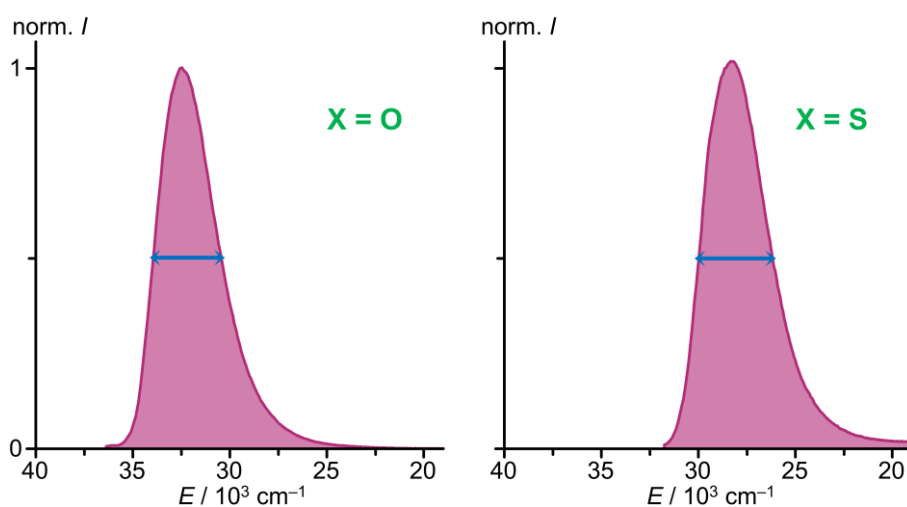

**Fig. S21** Normalised emission spectra (purple) of the ligands bpop ( $\lambda_{\text{exc}} = 267$  nm) and bptp ( $\lambda_{\text{exc}} = 308$  nm) in acetonitrile and illustration of the full width at half maximum (FWHM).

## Analytical data of Cr compounds

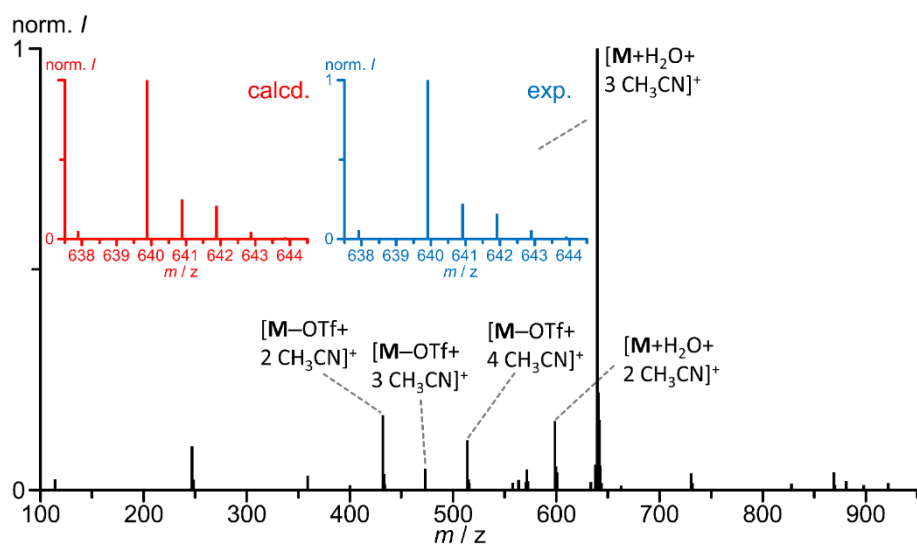

**Fig. S22** ESI<sup>+</sup> mass spectrum of Cr(OTf)<sub>3</sub> in CH<sub>3</sub>CN with insets of the experimentally found (blue) and calculated (red) isotope pattern for [M+H<sub>2</sub>O+3 CH<sub>3</sub>CN]<sup>+</sup> (C<sub>9</sub>H<sub>11</sub>CrF<sub>9</sub>N<sub>3</sub>O<sub>10</sub>S<sub>3</sub>).

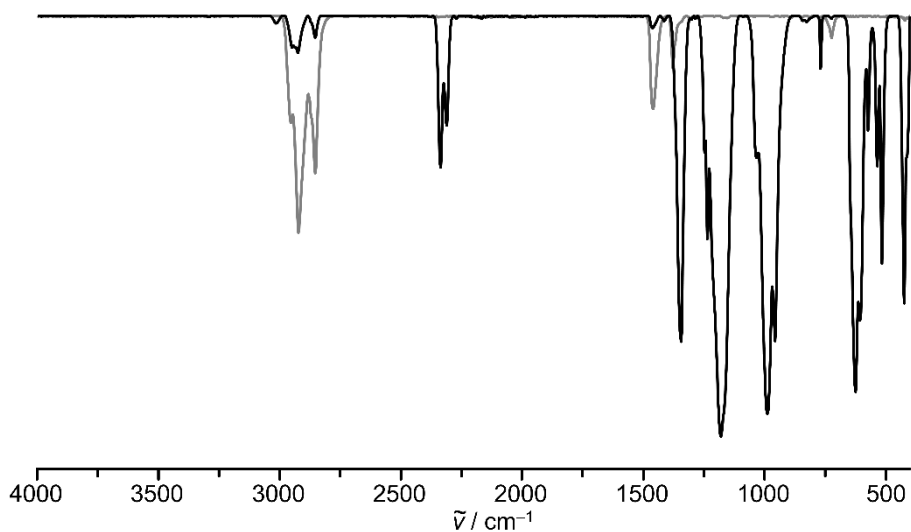

**Fig. S23** ATR-IR spectrum of Cr(OTf)<sub>3</sub> as suspension in nujol (black) and ATR-IR spectrum of nujol (grey).

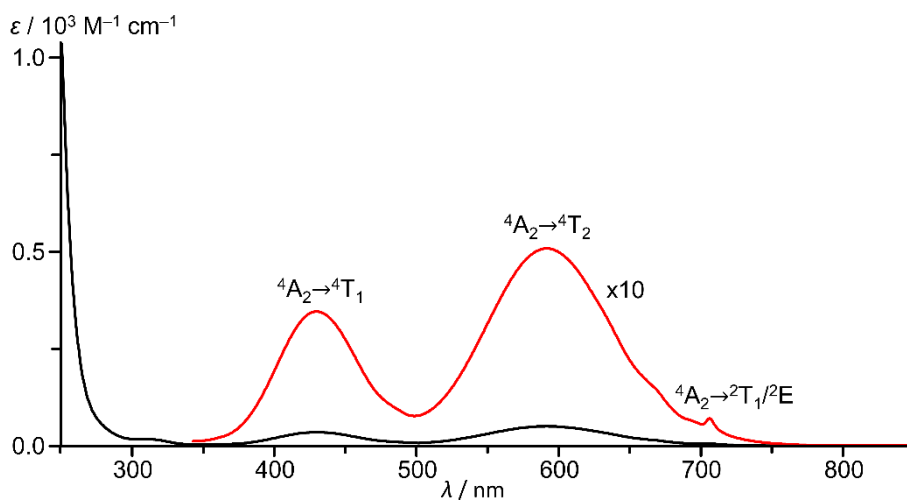

**Fig. S24** UV/VIS/NIR absorption spectrum (black) of  $\text{Cr}(\text{OTf})_3$  in dry acetonitrile at room temperature and zoomed region of the ligand field bands (red).

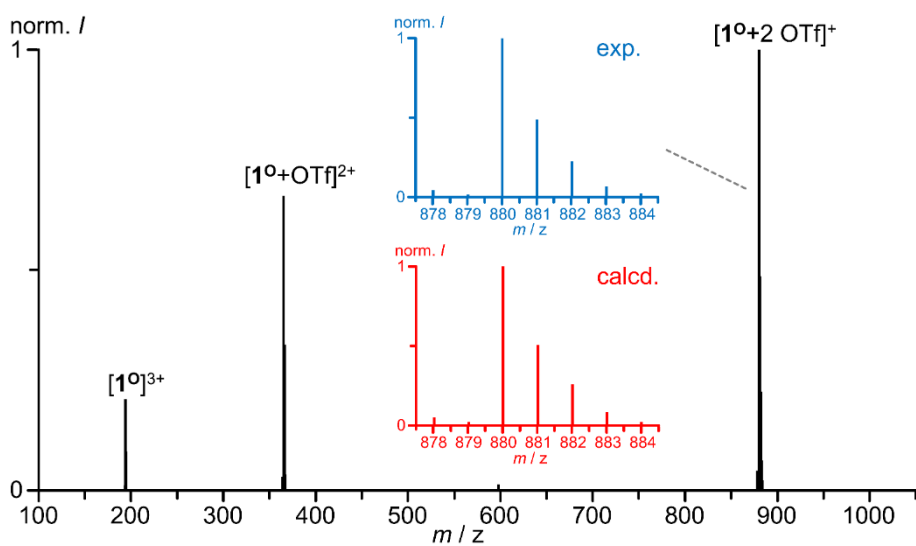

**Fig. S25** ESI<sup>+</sup> mass spectrum of  $[1^O][OTf]_3$  in  $CH_3CN$  with insets of the experimentally found (blue) and calculated (red) isotope pattern for  $[1^O+2 OTf]^+$  ( $C_{32}H_{22}CrF_6N_6O_{10}S_2$ ).

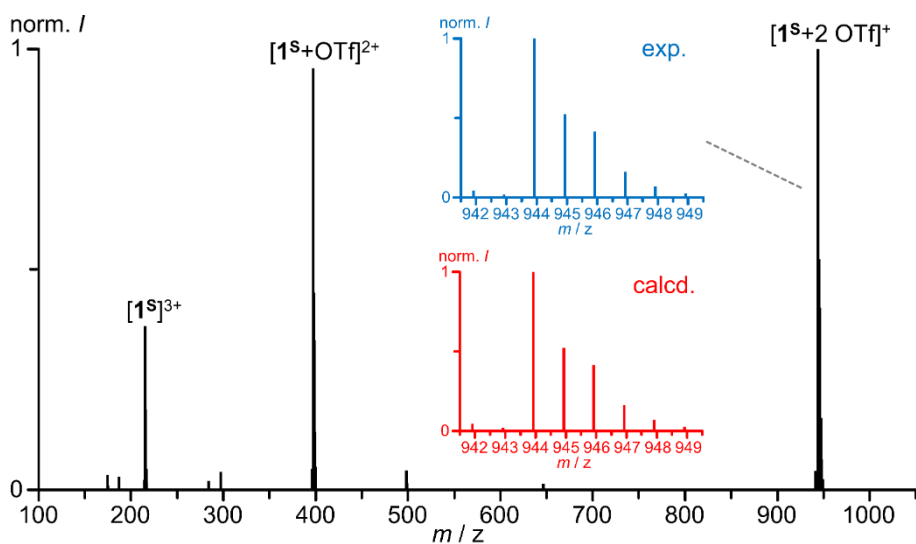

**Fig. S26** ESI<sup>+</sup> mass spectrum of  $[1^S][OTf]_3$  in  $CH_3CN$  with insets of the experimentally found (blue) and calculated (red) isotope pattern for  $[1^S+2 OTf]^+$  ( $C_{32}H_{22}CrF_6N_6O_6S_6$ ).

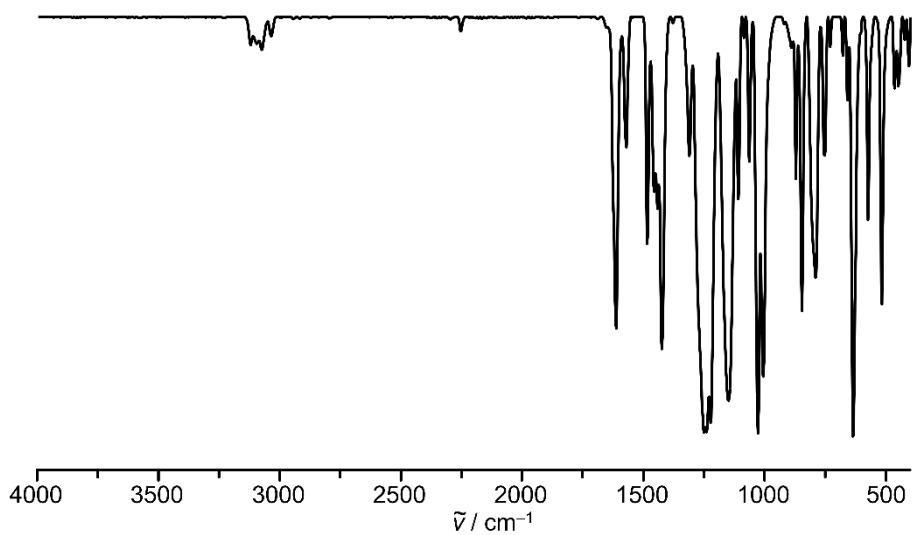

**Fig. S27** ATR-IR spectrum of  $[\text{1}^{\text{o}}][\text{OTf}]_3$ .

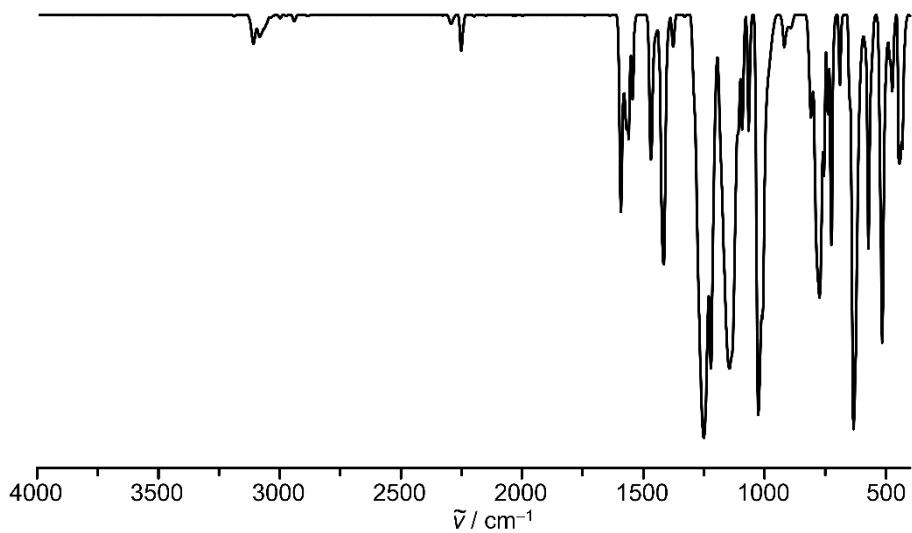

**Fig. S28** ATR-IR spectrum of  $[\text{1}^{\text{s}}][\text{OTf}]_3$ .

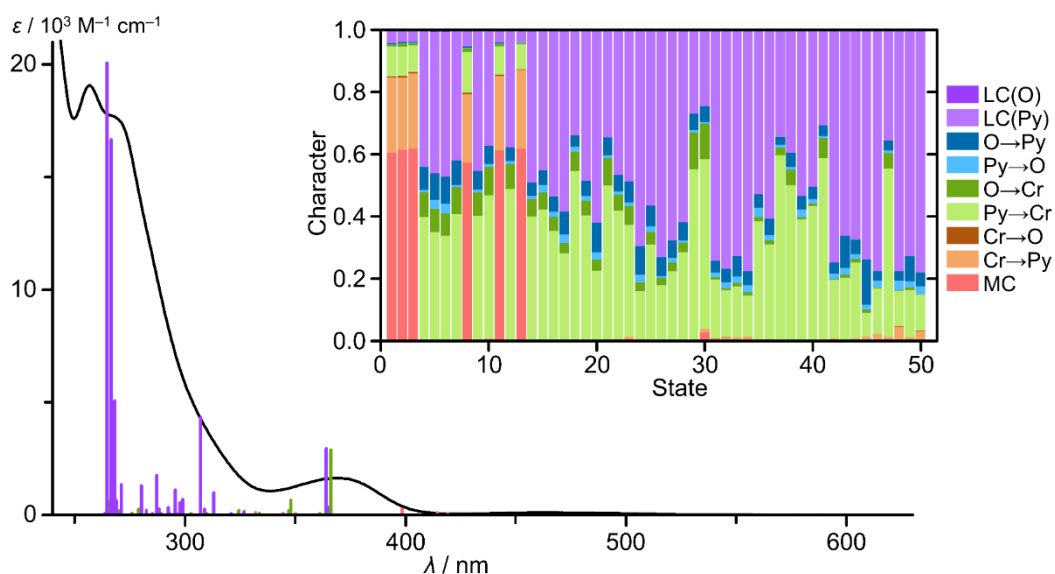

**Fig. S29** UV/VIS absorption spectrum of  $[1^0][OTf]_3$  in  $CH_3CN$  (black) with TD-DFT calculated oscillator strengths of  $[1^0]^{3+}$  coloured according to the most dominant character of the corresponding transition (red: MC, green: LMCT, purple: LC). Inset: Charge transfer number analysis of the 50 lowest energy spin-allowed transitions calculated by Löwdin population analysis with the complex cation  $[1^0]^{3+}$  fragmented into chromium (Cr), the pyridine system (Py) and the oxygen atoms (O).

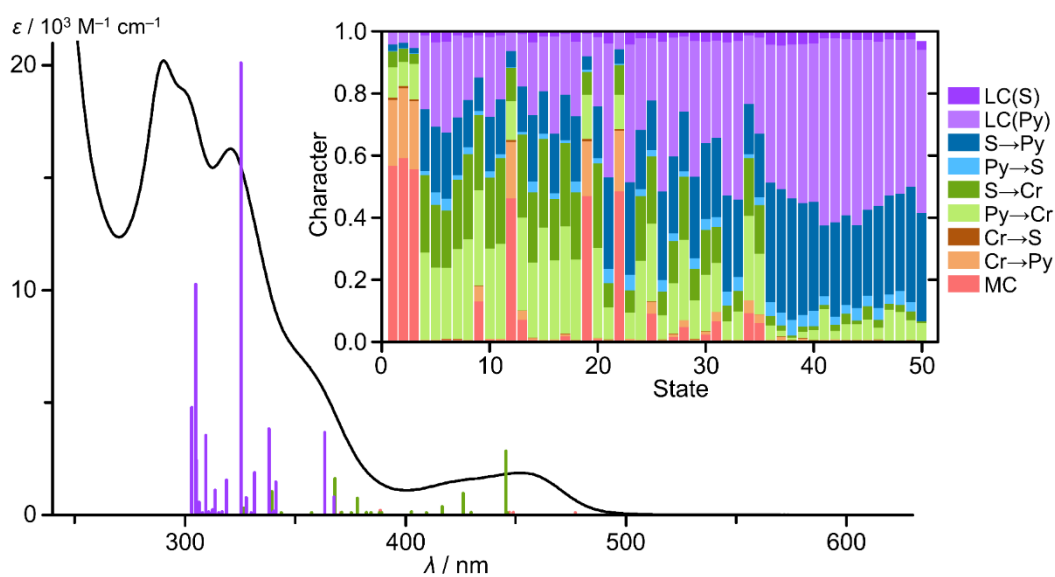

**Fig. S30** UV/VIS absorption spectrum of  $[1^S][OTf]_3$  in  $CH_3CN$  (black) with TD-DFT calculated oscillator strengths of  $[1^S]^{3+}$  coloured according to the most dominant character of the corresponding transition (red: MC, green: LMCT, purple: LC). Inset: Charge transfer number analysis of the 50 lowest energy spin-allowed transitions calculated by Löwdin population analysis with the complex cation  $[1^S]^{3+}$  fragmented into chromium (Cr), the pyridine system (Py) and the sulphur atoms (S).

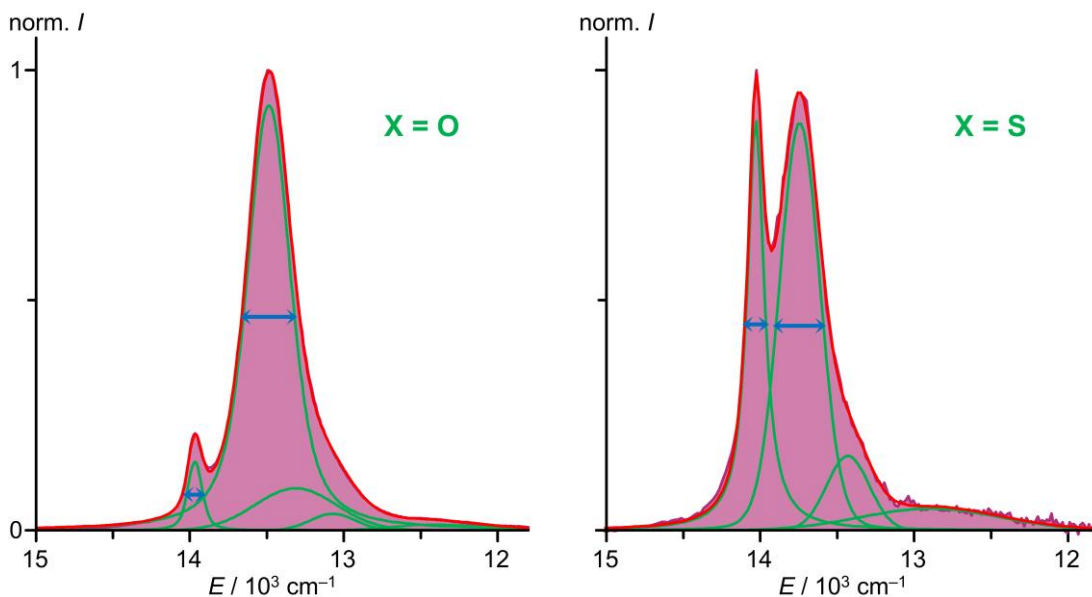

**Fig. S31** Normalised emission spectra (purple) of the complexes  $[1^O]^{3+}$  ( $\lambda_{exc} = 450$  nm) and  $[1^S]^{3+}$  ( $\lambda_{exc} = 450$  nm) in acetonitrile at 293 K fitted with Voigt functions (green) in a sum fit (red) used for determining the full width at half maximum (FWHM).

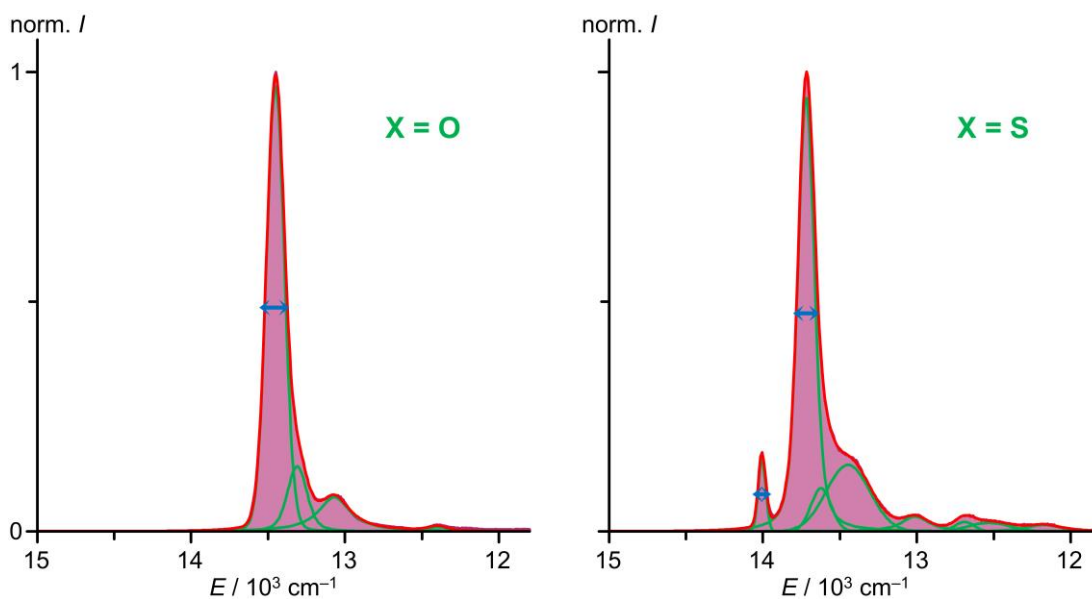

**Fig. S32** Normalised emission spectra (purple) of the complexes  $[1^O]^{3+}$  ( $\lambda_{exc} = 450$  nm) and  $[1^S]^{3+}$  ( $\lambda_{exc} = 450$  nm) in ethanol/methanol (3:2) at 77 K fitted with Voigt functions (green) in a sum fit (red) used for determining the full width at half maximum (FWHM).

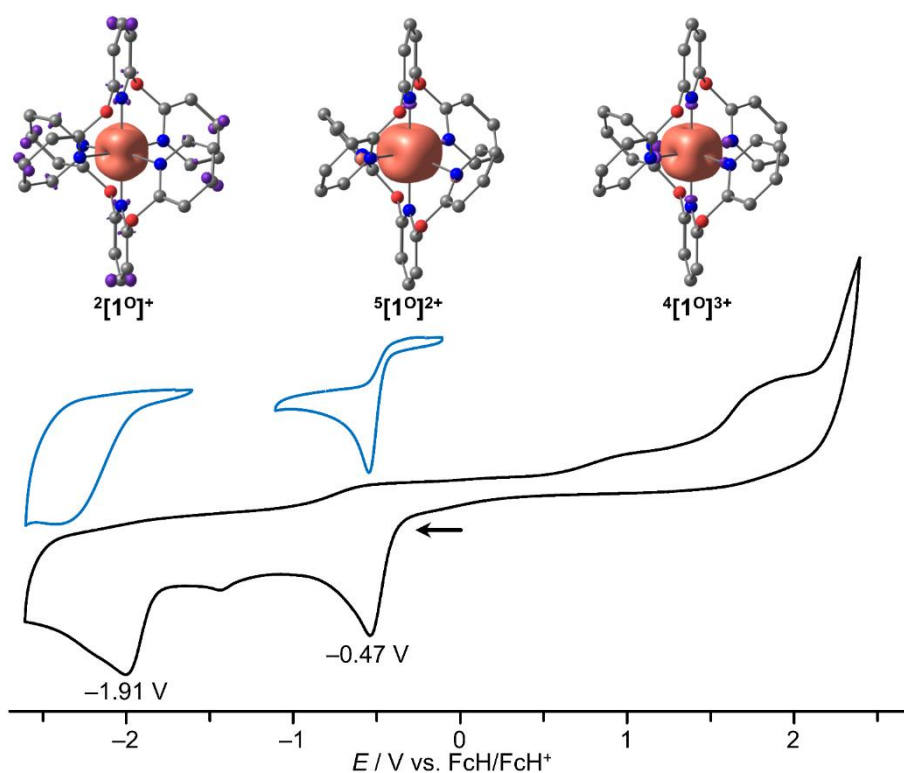

**Fig. S33** Cyclic voltammograms of 3 mM  $[1^0][OTf]_3$  in a 100 mM solution of  $[nBu_4N][PF_6]$  in  $CH_3CN$  over the full range (peak potentials  $E_p$  against  $FcH^+/FcH$ ) and in the range of the reduction waves and calculated spin densities (contour value: 0.01 a.u.) of the thermodynamically most stable reduced species.

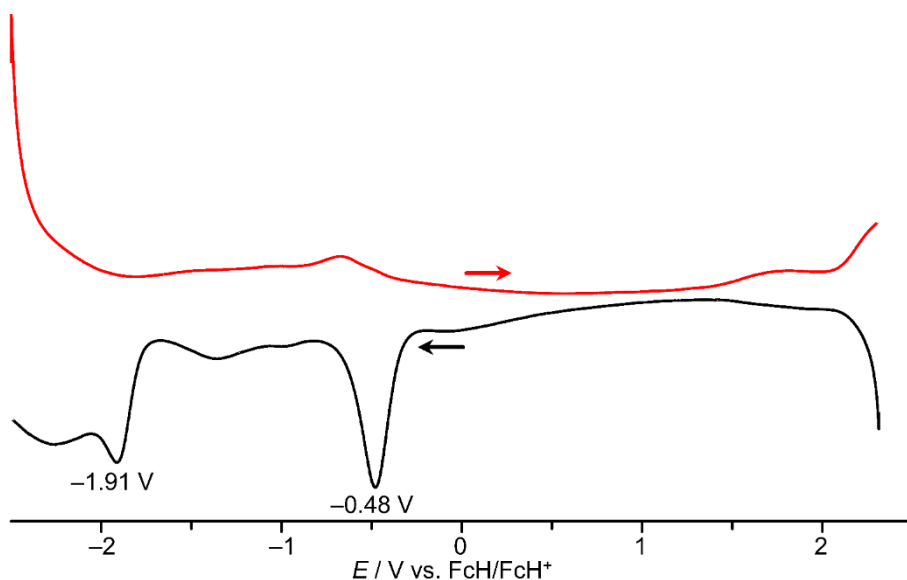

**Fig. S34** Square wave voltammograms of 3 mM  $[1^0][OTf]_3$  in a 100 mM solution of  $[nBu_4N][PF_6]$  in  $CH_3CN$  (peak potentials  $E_p$  against  $FcH^+/FcH$ ).



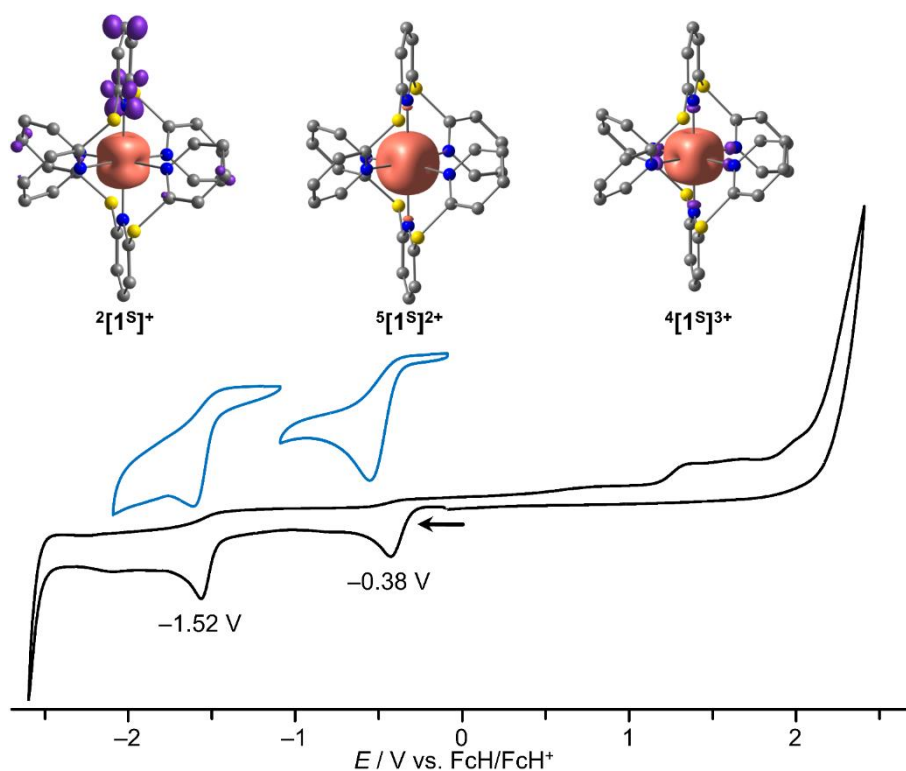

**Fig. S35** Cyclic voltammograms of 3 mM  $[1^S][OTf]_3$  in a 100 mM solution of  $[nBu_4N][PF_6]$  in  $CH_3CN$  over the full range (peak potentials  $E_p$  against  $FcH^+/FcH$ ) and in the range of the reduction waves and calculated spin densities (contour value: 0.01 a.u.) of the thermodynamically most stable reduced species.

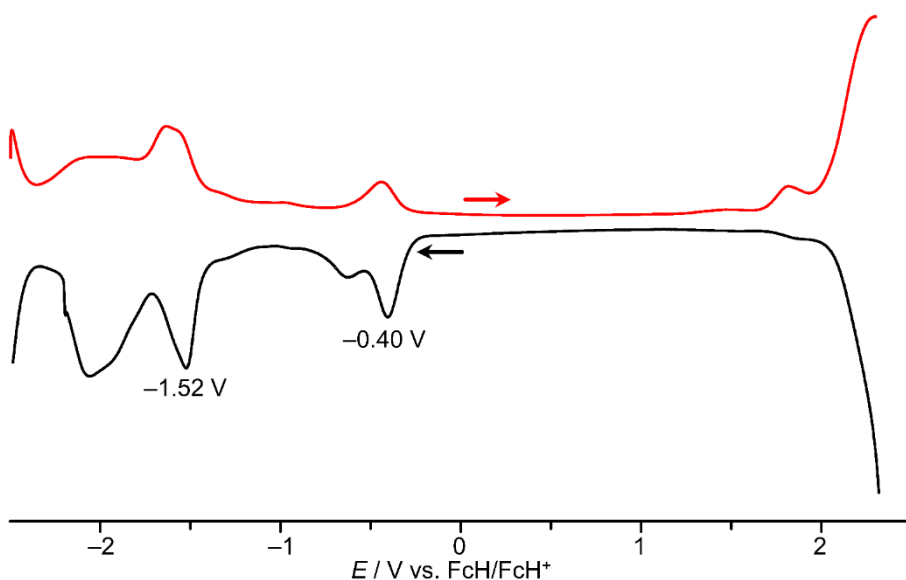

**Fig. S36** Square wave voltammograms of 3 mM  $[1^S][OTf]_3$  in a 100 mM solution of  $[nBu_4N][PF_6]$  in  $CH_3CN$  (peak potentials  $E_p$  against  $FcH^+/FcH$ ).

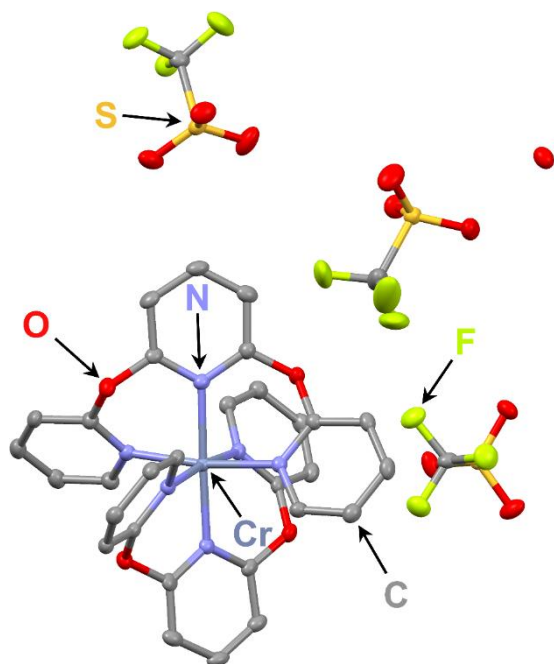

**Fig. S37** Molecular structure of  $[1^O][OTf]_3 \cdot xH_2O$  in the solid state. Hydrogen atoms omitted, thermal ellipsoids at 50% probability level.

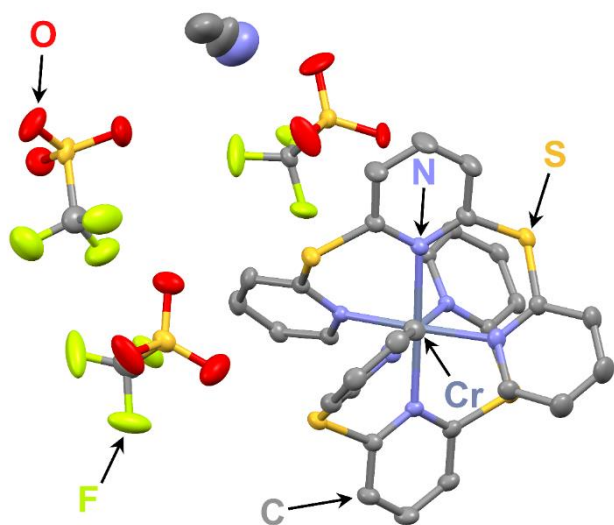

**Fig. S38** Molecular structure of  $[1^S][OTf]_3 \cdot xCH_3CN$  in the solid state. Hydrogen atoms omitted, thermal ellipsoids at 50% probability level.

**Table S1** Structure parameters of the complex series  $[1^X]^{3+}$  from crystal structure determination (XRD) and DFT geometry optimisation with an exemplary structure illustration.<sup>43,44</sup> Bond lengths are given in Å and angles in °.

| Complex                  | Method | Parameter                             |                                       |                                       |                                       | Graphical illustration                                                                |
|--------------------------|--------|---------------------------------------|---------------------------------------|---------------------------------------|---------------------------------------|---------------------------------------------------------------------------------------|
|                          |        | $d(\text{Cr}-\text{N}_c^1)$           | $d(\text{Cr}-\text{N}_c^2)$           |                                       |                                       | 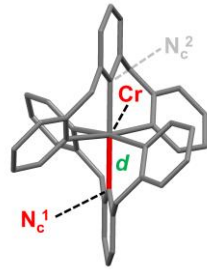   |
| $[1^S]^{3+}$             | XRD    | 2.1006(16)                            | 2.0868(16)                            |                                       |                                       |                                                                                       |
|                          | DFT    | 2.1400                                | 2.1399                                |                                       |                                       |                                                                                       |
| $[1^O]^{3+}$             | XRD    | 2.0391(28)                            | 2.0377(28)                            |                                       |                                       |                                                                                       |
|                          | DFT    | 2.0510                                | 2.0507                                |                                       |                                       |                                                                                       |
| $[1^{\text{NMe}}]^{3+}$  | XRD    | 2.0405(18)                            | 2.0358(18)                            |                                       |                                       |                                                                                       |
|                          | DFT    | 2.0463                                | 2.0460                                |                                       |                                       |                                                                                       |
| $[1^{\text{CH}_2}]^{3+}$ | XRD    | 2.0771(13)                            | 2.0599(13)                            |                                       |                                       |                                                                                       |
|                          | DFT    | 2.1127                                | 2.1119                                |                                       |                                       |                                                                                       |
|                          |        | $d(\text{Cr}-\text{N}_t^1)$           | $d(\text{Cr}-\text{N}_t^2)$           | $d(\text{Cr}-\text{N}_t^3)$           | $d(\text{Cr}-\text{N}_t^4)$           |    |
| $[1^S]^{3+}$             | XRD    | 2.0852(17)                            | 2.0785(16)                            | 2.0723(16)                            | 2.0639(16)                            |                                                                                       |
|                          | DFT    | 2.1178                                | 2.1180                                | 2.1178                                | 2.1180                                |                                                                                       |
| $[1^O]^{3+}$             | XRD    | 2.0601(26)                            | 2.0479(31)                            | 2.0380(27)                            | 2.0419(31)                            |                                                                                       |
|                          | DFT    | 2.0707                                | 2.0705                                | 2.0707                                | 2.0705                                |                                                                                       |
| $[1^{\text{NMe}}]^{3+}$  | XRD    | 2.0530(18)                            | 2.0418(19)                            | 2.0414(18)                            | 2.0309(18)                            |                                                                                       |
|                          | DFT    | 2.0580                                | 2.0576                                | 2.0578                                | 2.0575                                |                                                                                       |
| $[1^{\text{CH}_2}]^{3+}$ | XRD    | 2.0886(13)                            | 2.0755(13)                            | 2.0703(13)                            | 2.0691(13)                            |                                                                                       |
|                          | DFT    | 2.1128                                | 2.1112                                | 2.1100                                | 2.1128                                |                                                                                       |
|                          |        | $\angle (\text{N}_c^1\text{CrN}_c^2)$ | $\alpha (\text{N}_t^1\text{CrN}_t^3)$ | $\alpha (\text{N}_t^2\text{CrN}_t^4)$ |                                       |  |
| $[1^S]^{3+}$             | XRD    | 178.83(7)                             | 177.38(7)                             | 178.15(7)                             |                                       |                                                                                       |
|                          | DFT    | 179.99                                | 178.65                                | 178.69                                |                                       |                                                                                       |
| $[1^O]^{3+}$             | XRD    | 178.24(12)                            | 172.30(12)                            | 172.82(12)                            |                                       |                                                                                       |
|                          | DFT    | 180.00                                | 173.99                                | 173.94                                |                                       |                                                                                       |
| $[1^{\text{NMe}}]^{3+}$  | XRD    | 179.90(9)                             | 171.98(7)                             | 171.78(7)                             |                                       |                                                                                       |
|                          | DFT    | 179.88                                | 172.97                                | 173.06                                |                                       |                                                                                       |
| $[1^{\text{CH}_2}]^{3+}$ | XRD    | 178.58(4)                             | 177.47(4)                             | 177.65(4)                             |                                       |                                                                                       |
|                          | DFT    | 179.72                                | 176.56                                | 176.74                                |                                       |                                                                                       |
|                          |        | $\beta (\text{N}_t^1\text{CrN}_t^2)$  | $\angle (\text{N}_t^2\text{CrN}_t^3)$ | $\beta (\text{N}_t^3\text{CrN}_t^4)$  | $\angle (\text{N}_t^4\text{CrN}_t^1)$ |  |
| $[1^S]^{3+}$             | XRD    | 85.70(7)                              | 96.75(7)                              | 84.97(6)                              | 92.59(7)                              |                                                                                       |
|                          | DFT    | 85.58                                 | 94.44                                 | 85.58                                 | 94.43                                 |                                                                                       |
| $[1^O]^{3+}$             | XRD    | 89.63(11)                             | 90.65(11)                             | 89.79(11)                             | 90.90(11)                             |                                                                                       |
|                          | DFT    | 90.06                                 | 90.27                                 | 90.06                                 | 90.25                                 |                                                                                       |
| $[1^{\text{NMe}}]^{3+}$  | XRD    | 90.44(7)                              | 91.27(7)                              | 89.08(7)                              | 90.35(7)                              |                                                                                       |
|                          | DFT    | 88.99                                 | 91.53                                 | 88.93                                 | 91.40                                 |                                                                                       |
| $[1^{\text{CH}_2}]^{3+}$ | XRD    | 85.08(5)                              | 93.04(5)                              | 84.63(5)                              | 97.25(5)                              |                                                                                       |
|                          | DFT    | 84.82                                 | 95.02                                 | 84.86                                 | 95.49                                 |                                                                                       |

| Complex  | Method | Parameter                                 |                                           |                                           |                                           | Graphical illustration |  |
|----------|--------|-------------------------------------------|-------------------------------------------|-------------------------------------------|-------------------------------------------|------------------------|--|
|          |        | $\angle (\text{N}_c^1\text{CrN}_t^1)$     | $\angle (\text{N}_c^1\text{CrN}_t^2)$     | $\angle (\text{N}_c^1\text{CrN}_t^3)$     | $\angle (\text{N}_c^1\text{CrN}_t^4)$     |                        |  |
| [1S]3+   | XRD    | 89.30(7)                                  | 89.42(6)                                  | 89.81(6)                                  | 91.26(6)                                  |                        |  |
|          | DFT    | 89.33                                     | 90.65                                     | 89.33                                     | 90.66                                     |                        |  |
| [1O]3+   | XRD    | 86.00(11)                                 | 94.62(12)                                 | 86.31(11)                                 | 92.56(12)                                 |                        |  |
|          | DFT    | 86.99                                     | 93.03                                     | 87.00                                     | 93.03                                     |                        |  |
| [1NMe]3+ | XRD    | 86.00(7)                                  | 93.90(7)                                  | 86.07(7)                                  | 94.32(8)                                  |                        |  |
|          | DFT    | 86.50                                     | 93.39                                     | 86.47                                     | 93.56                                     |                        |  |
| [1CH2]3+ | XRD    | 89.69(5)                                  | 89.11(5)                                  | 88.59(5)                                  | 91.20(5)                                  |                        |  |
|          | DFT    | 88.26                                     | 91.65                                     | 88.31                                     | 91.60                                     |                        |  |
|          |        | $\angle (\text{N}_c^2\text{CrN}_t^1)$     | $\angle (\text{N}_c^2\text{CrN}_t^2)$     | $\angle (\text{N}_c^2\text{CrN}_t^3)$     | $\angle (\text{N}_c^2\text{CrN}_t^4)$     |                        |  |
| [1S]3+   | XRD    | 91.44(7)                                  | 89.73(6)                                  | 89.50(6)                                  | 89.61(6)                                  |                        |  |
|          | DFT    | 90.68                                     | 89.35                                     | 90.67                                     | 89.35                                     |                        |  |
| [1O]3+   | XRD    | 92.78(11)                                 | 86.63(11)                                 | 94.92(11)                                 | 86.19(12)                                 |                        |  |
|          | DFT    | 93.01                                     | 86.97                                     | 93.00                                     | 86.97                                     |                        |  |
| [1NMe]3+ | XRD    | 94.08(7)                                  | 86.04(7)                                  | 93.85(7)                                  | 85.74(8)                                  |                        |  |
|          | DFT    | 93.56                                     | 86.52                                     | 93.46                                     | 86.54                                     |                        |  |
| [1CH2]3+ | XRD    | 90.68(5)                                  | 89.55(5)                                  | 91.00(5)                                  | 90.11(5)                                  |                        |  |
|          | DFT    | 92.02                                     | 88.34                                     | 91.41                                     | 88.41                                     |                        |  |
|          |        | $a (\text{C}^1\text{-X}^1)$               | $a (\text{C}^2\text{-X}^1)$               | $a (\text{C}^3\text{-X}^2)$               | $a (\text{C}^4\text{-X}^2)$               |                        |  |
| [1S]3+   | XRD    | 1.7916(27)                                | 1.7686(21)                                | 1.7637(19)                                | 1.7661(20)                                |                        |  |
|          | DFT    | 1.7642                                    | 1.7697                                    | 1.7642                                    | 1.7695                                    |                        |  |
| [1O]3+   | XRD    | 1.3702(41)                                | 1.3777(40)                                | 1.3841(36)                                | 1.3787(42)                                |                        |  |
|          | DFT    | 1.3677                                    | 1.3617                                    | 1.3677                                    | 1.3618                                    |                        |  |
| [1NMe]3+ | XRD    | 1.3971(28)                                | 1.4022(29)                                | 1.3866(28)                                | 1.4114(29)                                |                        |  |
|          | DFT    | 1.3901                                    | 1.4009                                    | 1.3904                                    | 1.4007                                    |                        |  |
| [1CH2]3+ | XRD    | 1.5014(21)                                | 1.5074(19)                                | 1.5015(19)                                | 1.5092(19)                                |                        |  |
|          | DFT    | 1.4999                                    | 1.5045                                    | 1.4998                                    | 1.5044                                    |                        |  |
|          |        | $a (\text{C}^5\text{-X}^3)$               | $a (\text{C}^6\text{-X}^3)$               | $a (\text{C}^7\text{-X}^4)$               | $a (\text{C}^8\text{-X}^4)$               |                        |  |
| [1S]3+   | XRD    | 1.7634(19)                                | 1.7688(21)                                | 1.7573(19)                                | 1.7589(21)                                |                        |  |
|          | DFT    | 1.7642                                    | 1.7697                                    | 1.7643                                    | 1.7695                                    |                        |  |
| [1O]3+   | XRD    | 1.3736(45)                                | 1.3815(43)                                | 1.3746(44)                                | 1.3687(44)                                |                        |  |
|          | DFT    | 1.3677                                    | 1.3617                                    | 1.3678                                    | 1.3618                                    |                        |  |
| [1NMe]3+ | XRD    | 1.3917(28)                                | 1.3961(29)                                | 1.3914(28)                                | 1.4070(29)                                |                        |  |
|          | DFT    | 1.3910                                    | 1.4006                                    | 1.3906                                    | 1.4009                                    |                        |  |
| [1CH2]3+ | XRD    | 1.5041(19)                                | 1.5147(18)                                | 1.5051(21)                                | 1.5145(18)                                |                        |  |
|          | DFT    | 1.5003                                    | 1.5049                                    | 1.4997                                    | 1.5044                                    |                        |  |
|          |        | $\angle (\text{C}^1\text{X}^1\text{C}^2)$ | $\angle (\text{C}^3\text{X}^2\text{C}^4)$ | $\angle (\text{C}^5\text{X}^3\text{C}^6)$ | $\angle (\text{C}^7\text{X}^4\text{C}^8)$ |                        |  |
| [1S]3+   | XRD    | 103.29(12)                                | 102.83(9)                                 | 104.08(9)                                 | 104.58(9)                                 |                        |  |
|          | DFT    | 104.44                                    | 104.45                                    | 104.44                                    | 104.45                                    |                        |  |
| [1O]3+   | XRD    | 122.10(26)                                | 118.16(26)                                | 119.36(27)                                | 123.34(28)                                |                        |  |
|          | DFT    | 122.47                                    | 122.45                                    | 122.48                                    | 122.44                                    |                        |  |
| [1NMe]3+ | XRD    | 122.03(19)                                | 121.39(19)                                | 122.13(19)                                | 122.79(18)                                |                        |  |
|          | DFT    | 122.30                                    | 122.34                                    | 122.25                                    | 122.25                                    |                        |  |
| [1CH2]3+ | XRD    | 112.04(11)                                | 117.90(11)                                | 118.65(12)                                | 117.20(11)                                |                        |  |
|          | DFT    | 115.14                                    | 115.33                                    | 115.13                                    | 115.00                                    |                        |  |

**Table S2** Structure parameters of the complex series  $[1^X]^{3+}$  from crystal structure determination (XRD) and DFT geometry optimisation each with an exemplary structure illustration.<sup>43,44</sup> The planes  $Py^n$  ( $n = 1-6$ ) or  $CrN_4$  were calculated by a least-square fit and contain the corresponding pyridine ring or the meridional coordinating nitrogen atoms and the chromium centre. Angles are given in  $^\circ$ .

| Complex          | Method | Parameter                   |                             | Graphical illustration |  |
|------------------|--------|-----------------------------|-----------------------------|------------------------|--|
|                  |        | $\phi$ ( $Py^1, Py^2$ )     |                             |                        |  |
| $[1^S]^{3+}$     | XRD    | 18.47(22)                   |                             |                        |  |
|                  | DFT    | 17.09                       |                             |                        |  |
| $[1^O]^{3+}$     | XRD    | 21.84(186)                  |                             |                        |  |
|                  | DFT    | 25.17                       |                             |                        |  |
| $[1^{NMe}]^{3+}$ | XRD    | 18.31(210)                  |                             |                        |  |
|                  | DFT    | 18.79                       |                             |                        |  |
| $[1^{CH2}]^{3+}$ | XRD    | 29.54(20)                   |                             |                        |  |
|                  | DFT    | 26.07                       |                             |                        |  |
|                  |        | $\delta^1$ ( $Py^3, Py^5$ ) | $\delta^2$ ( $Py^4, Py^6$ ) |                        |  |
| $[1^S]^{3+}$     | XRD    | 81.68(18)                   | 86.26(17)                   |                        |  |
|                  | DFT    | 82.03                       | 81.85                       |                        |  |
| $[1^O]^{3+}$     | XRD    | 73.51(122)                  | 69.75(235)                  |                        |  |
|                  | DFT    | 68.41                       | 68.56                       |                        |  |
| $[1^{NMe}]^{3+}$ | XRD    | 79.06(75)                   | 80.63(91)                   |                        |  |
|                  | DFT    | 78.79                       | 78.68                       |                        |  |
| $[1^{CH2}]^{3+}$ | XRD    | 72.28(32)                   | 71.23(21)                   |                        |  |
|                  | DFT    | 70.38                       | 69.89                       |                        |  |
|                  |        | $\zeta$ ( $Py^3, CrN_4$ )   | $\zeta$ ( $Py^4, CrN_4$ )   |                        |  |
| $[1^S]^{3+}$     | XRD    | 49.48(18)                   | 47.39(21)                   |                        |  |
|                  | DFT    | 48.99                       | 49.07                       |                        |  |
| $[1^O]^{3+}$     | XRD    | 55.42(82)                   | 56.31(180)                  |                        |  |
|                  | DFT    | 55.79                       | 55.73                       |                        |  |
| $[1^{NMe}]^{3+}$ | XRD    | 49.73(115)                  | 46.82(73)                   |                        |  |
|                  | DFT    | 50.69                       | 50.60                       |                        |  |
| $[1^{CH2}]^{3+}$ | XRD    | 56.64(16)                   | 53.96(14)                   |                        |  |
|                  | DFT    | 55.16                       | 54.87                       |                        |  |
|                  |        | $\zeta$ ( $Py^5, CrN_4$ )   | $\zeta$ ( $Py^6, CrN_4$ )   |                        |  |
| $[1^S]^{3+}$     | XRD    | 49.13(16)                   | 46.60(17)                   |                        |  |
|                  | DFT    | 48.98                       | 49.07                       |                        |  |
| $[1^O]^{3+}$     | XRD    | 51.07(126)                  | 54.03(218)                  |                        |  |
|                  | DFT    | 55.80                       | 55.72                       |                        |  |
| $[1^{NMe}]^{3+}$ | XRD    | 51.27(104)                  | 52.58(85)                   |                        |  |
|                  | DFT    | 50.53                       | 50.72                       |                        |  |
| $[1^{CH2}]^{3+}$ | XRD    | 52.28(29)                   | 55.39(20)                   |                        |  |
|                  | DFT    | 54.47                       | 55.24                       |                        |  |

**Table S3** TD-DFT calculated oscillator strengths and difference electron densities of the ten lowest energy spin-allowed transitions of  $[\text{1}^{\text{O}}]^{3+}$ .

| # | $\lambda / \text{nm}$ | oscillator strength | character                  | from                                                         | to                                               | difference electron density (purple: density loss, orange: density gain)              |
|---|-----------------------|---------------------|----------------------------|--------------------------------------------------------------|--------------------------------------------------|---------------------------------------------------------------------------------------|
| 1 | 419.0                 | 0.0000032           | MC (61%)<br>+ MLCT (24%)   | $t_{2g} (d_{xy})$                                            | $e_g (d_{x^2-y^2})$                              | 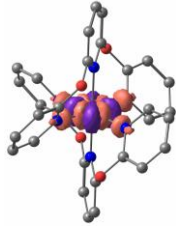   |
| 2 | 414.3                 | 0.0002689           | MC (62%)<br>+ MLCT (24%)   | $t_{2g} (d_{xz}+d_{yz})'$                                    | $e_g (d_{z^2})$                                  |    |
| 3 | 398.4                 | 0.0009169           | MC (62%)<br>+ MLCT (25%)   | $t_{2g} (d_{xz}+d_{yz})'$<br>+<br>$t_{2g} (d_{xz}+d_{yz})''$ | $e_g (d_{z^2})$                                  |   |
| 4 | 366.2                 | 0.0131411           | LMCT (48%)<br>+ LC (32%)   | p (O)<br>and<br>$\pi (Py_t)$                                 | $t_{2g} (d_{xy})$<br>and<br>$\pi (Py_t)$         |  |
| 5 | 364.7                 | 0.0013474           | LMCT (42%)<br>+ LC (32%)   | p (O)<br>and<br>$\pi (Py_c)$                                 | $t_{2g} (d_{xz}+d_{yz})'$<br>and<br>$\pi (Py_c)$ |  |
| 6 | 364.1                 | 0.0134968           | LMCT (41%)<br>+ LC (34%)   | p (O)<br>and<br>$\pi (Py_c)$                                 | $t_{2g} (d_{xz}+d_{yz})'$<br>and<br>$\pi (Py_c)$ |  |
| 7 | 361.2                 | 0.0000006           | LMCT (49%)<br>+ ILCT (26%) | p (O)<br>and<br>$\pi (Py_c)$                                 | $t_{2g} (d_{xy})$<br>and<br>$\pi (Py_t)$         |  |

| #  | $\lambda / \text{nm}$ | oscillator strength | character                | from              | to                         | difference electron density (purple: density loss, orange: density gain)            |
|----|-----------------------|---------------------|--------------------------|-------------------|----------------------------|-------------------------------------------------------------------------------------|
| 8  | 350.2                 | 0.0000000           | MC (57%)<br>+ MLCT (23%) | $t_{2g} (d_{xy})$ | $e_g (d_{z^2})$            | 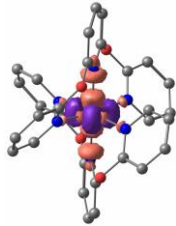 |
| 9  | 348.0                 | 0.0028086           | LMCT (47%)<br>+ LC (36%) | p (O)             | $t_{2g} (d_{xz}+d_{yz})''$ |  |
| 10 | 347.2                 | 0.0006875           | LMCT (55%)<br>+ LC (27%) | p (O)             | $t_{2g} (d_{xz}+d_{yz})''$ |  |

**Table S4** TD-DFT calculated oscillator strengths and difference electron densities of the ten lowest energy spin-allowed transitions of  $[1^S]^{3+}$ .

| # | $\lambda / \text{nm}$ | oscillator strength | character                | from                                                         | to                  | difference electron density (purple: density loss, orange: density gain)              |
|---|-----------------------|---------------------|--------------------------|--------------------------------------------------------------|---------------------|---------------------------------------------------------------------------------------|
| 1 | 477.0                 | 0.0000202           | MC (57%)<br>+ MLCT (22%) | $t_{2g} (d_{xz}+d_{yz})'$                                    | $e_g (d_{z^2})$     | 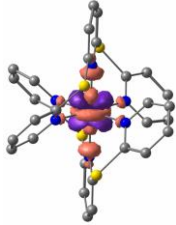 |
| 2 | 448.9                 | 0.0001916           | MC (59%)<br>+ MLCT (23%) | $t_{2g} (d_{xz}+d_{yz})'$<br>+<br>$t_{2g} (d_{xz}+d_{yz})''$ | $e_g (d_{z^2})$     |  |
| 3 | 447.0                 | 0.0000868           | MC (56%)<br>+ MLCT (23%) | $t_{2g} (d_{xy})$                                            | $e_g (d_{x^2-y^2})$ |  |

| #  | $\lambda / \text{nm}$ | oscillator strength | character                  | from                        | to                                                                                         | difference electron density (purple: density loss, orange: density gain)              |
|----|-----------------------|---------------------|----------------------------|-----------------------------|--------------------------------------------------------------------------------------------|---------------------------------------------------------------------------------------|
| 4  | 446.2                 | 0.0000026           | LMCT (53%)<br>+ ILCT (32%) | p (S)<br>and<br>$\pi$ (Pyc) | $t_{2g}$ ( $d_{xy}$ )                                                                      | 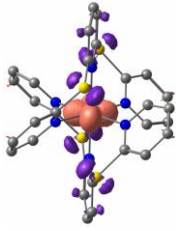   |
| 5  | 445.6                 | 0.0228827           | LMCT (44%)<br>+ ILCT (36%) | p (S)<br>and<br>$\pi$ (Pyc) | $t_{2g}$ ( $d_{xz}+d_{yz}$ )'<br>and<br>$\pi$ (Pyc)                                        |    |
| 6  | 429.8                 | 0.0001514           | LMCT (41%)<br>+ ILCT (37%) | p (S)<br>and<br>$\pi$ (Pyc) | $t_{2g}$ ( $d_{xz}+d_{yz}$ )'<br>+<br>$t_{2g}$ ( $d_{xz}+d_{yz}$ )''<br>and<br>$\pi$ (Pyc) |    |
| 7  | 426.1                 | 0.0072654           | LMCT (51%)<br>+ ILCT (29%) | p (S)                       | $t_{2g}$ ( $d_{xy}$ )                                                                      |   |
| 8  | 416.6                 | 0.0023140           | LMCT (60%)<br>+ ILCT (26%) | p (S)<br>and<br>$\pi$ (Pyc) | $t_{2g}$ ( $d_{xz}+d_{yz}$ )''                                                             |  |
| 9  | 409.4                 | 0.0000000           | LMCT (55%)<br>+ ILCT (19%) | p (S)                       | $e_g$ ( $d_{z^2}$ )<br>and<br>$e_g$ ( $d_{x^2-y^2}$ )                                      |  |
| 10 | 402.6                 | 0.0004712           | LMCT (52%)<br>+ ILCT (28%) | p (S)                       | $t_{2g}$ ( $d_{xz}+d_{yz}$ )''                                                             |  |



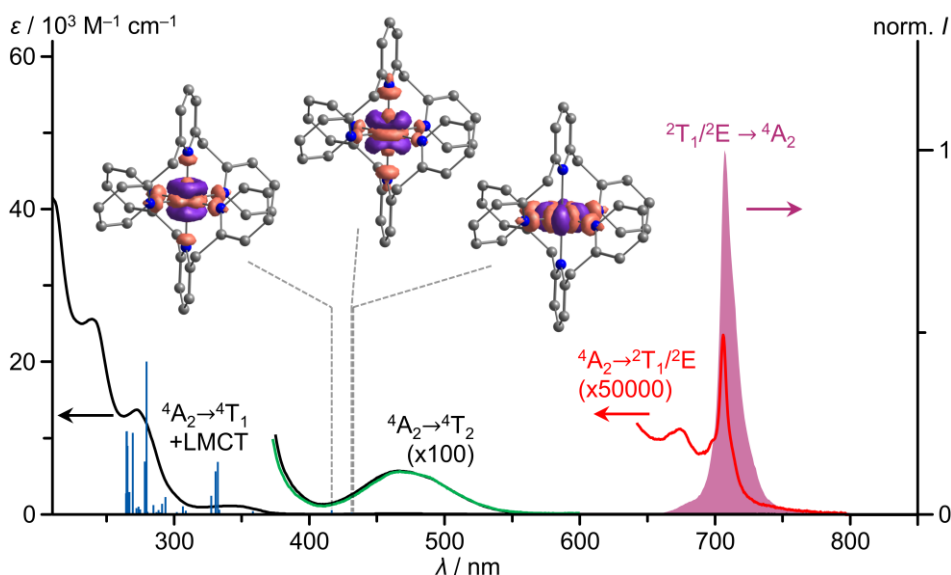

**Fig. S39** UV/VIS/NIR absorption spectrum (black, red), excitation spectrum ( $\lambda_{em} = 708$  nm, green) and emission spectrum ( $\lambda_{exc} = 462$  nm, purple) of  $[1^{CH_2}][OTf]_3$  in deaerated acetonitrile at room temperature, TD-DFT calculated oscillator strengths (blue) and difference electron densities of three low energy transitions of  $^4MC$  character of  $[1^{CH_2}]^{3+}$ .<sup>43</sup> The regions of the spin forbidden absorption bands, the lowest energy spin allowed absorption band and the excitation spectrum are zoomed.

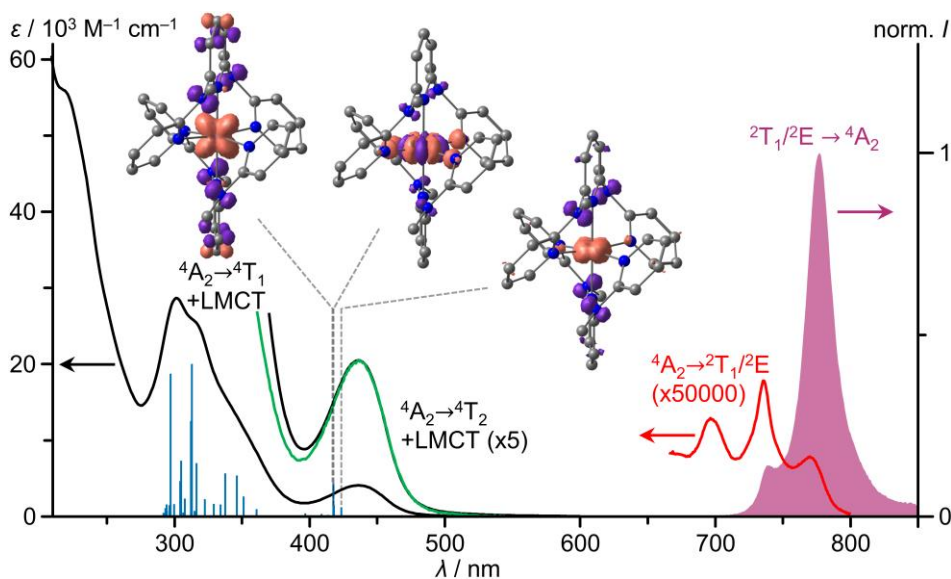

**Fig. S40** UV/VIS/NIR absorption spectrum (black, red), excitation spectrum ( $\lambda_{em} = 775$  nm, green) and emission spectrum ( $\lambda_{exc} = 435$  nm, purple) of  $[1^{NMe}][BF_4]_3$  in deaerated acetonitrile at room temperature, TD-DFT calculated oscillator strengths (blue) and difference electron densities of three low energy transitions of  $^4LMCT$  and  $^4MC$  character of  $[1^{NMe}]^{3+}$ .<sup>44</sup> The regions of the spin forbidden absorption bands, the lowest energy spin allowed/LMCT absorption band and the excitation spectrum are zoomed.

**Table S5** CASSCF(x,y)-SC/NEVPT2 results of the complex series  $[1^X]^{3+}$  depending on the active space with energies in  $\text{cm}^{-1}$  (bold values indicate the lowest state of each multiplicity).

| Complex                  | (x,y)   | ${}^2E(1)$ | ${}^2E(2)$ | ${}^2T_1(1)$ | ${}^2T_1(2)$ | ${}^2T_1(3)$ | ${}^2T_2(1)$ | ${}^2T_2(2)$ | ${}^2T_2(3)$ | ${}^4T_2(1)$ | ${}^4T_2(2)$ | ${}^4T_2(3)$ |
|--------------------------|---------|------------|------------|--------------|--------------|--------------|--------------|--------------|--------------|--------------|--------------|--------------|
| $[1^O]^{3+}$             | (3,5)   | 16440      | 17239      | <b>15924</b> | 16849        | 17181        | 25217        | 25641        | 25674        | <b>22000</b> | 22486        | 23571        |
|                          | (3,10)  | 16196      | 16991      | <b>15659</b> | 16580        | 16936        | 24926        | 25372        | 25376        | <b>21614</b> | 22068        | 23168        |
|                          | (13,10) | 16271      | 16912      | <b>15760</b> | 16515        | 16792        | 24507        | 25053        | 25094        | <b>22267</b> | 22638        | 23787        |
|                          | (7,12)  | 15726      | 16299      | <b>15265</b> | 15915        | 16206        | 23861        | 24310        | 24334        | <b>22664</b> | 23047        | 24073        |
| $[1^S]^{3+}$             | (3,5)   | 16610      | 17470      | <b>16325</b> | 17228        | 17501        | 25045        | 25415        | 25489        | <b>19511</b> | 20638        | 20667        |
|                          | (3,10)  | 16369      | 17224      | <b>16067</b> | 16950        | 17266        | 24786        | 25110        | 25185        | <b>19144</b> | 20294        | 20304        |
|                          | (13,10) | 16536      | 17154      | <b>16226</b> | 16938        | 17159        | 24564        | 24835        | 24878        | <b>19762</b> | 20974        | 21040        |
|                          | (7,12)  | 15958      | 16544      | <b>15725</b> | 16292        | 16568        | 23835        | 24178        | 24186        | <b>20293</b> | 21372        | 21393        |
| $[1^{\text{NMe}}]^{3+}$  | (3,5)   | 16345      | 17155      | <b>15712</b> | 16897        | 17002        | 25205        | 25414        | 25779        | <b>22626</b> | 22648        | 23846        |
|                          | (3,10)  | 16091      | 16902      | <b>15454</b> | 16625        | 16758        | 24940        | 25101        | 25479        | <b>22233</b> | 22243        | 23432        |
|                          | (13,10) | 16140      | 16749      | <b>15460</b> | 16519        | 16545        | 24551        | 24588        | 25074        | <b>22700</b> | 22818        | 23928        |
|                          | (7,12)  | 15597      | 16180      | <b>15051</b> | 15928        | 16011        | 23823        | 23984        | 24361        | <b>23216</b> | 23262        | 24310        |
| $[1^{\text{CH}_2}]^{3+}$ | (3,5)   | 16562      | 17407      | <b>16331</b> | 17135        | 17440        | 25270        | 25462        | 25502        | <b>20914</b> | 21103        | 22027        |
|                          | (3,10)  | 16322      | 17165      | <b>16069</b> | 16858        | 17206        | 25007        | 25173        | 25200        | <b>20571</b> | 20692        | 21636        |
|                          | (13,10) | 16503      | 17144      | <b>16286</b> | 16894        | 17125        | 24814        | 24899        | 25014        | <b>21276</b> | 21415        | 22374        |
|                          | (7,12)  | 15882      | 16454      | <b>15691</b> | 16208        | 16467        | 24006        | 24085        | 24208        | <b>21727</b> | 21840        | 22679        |

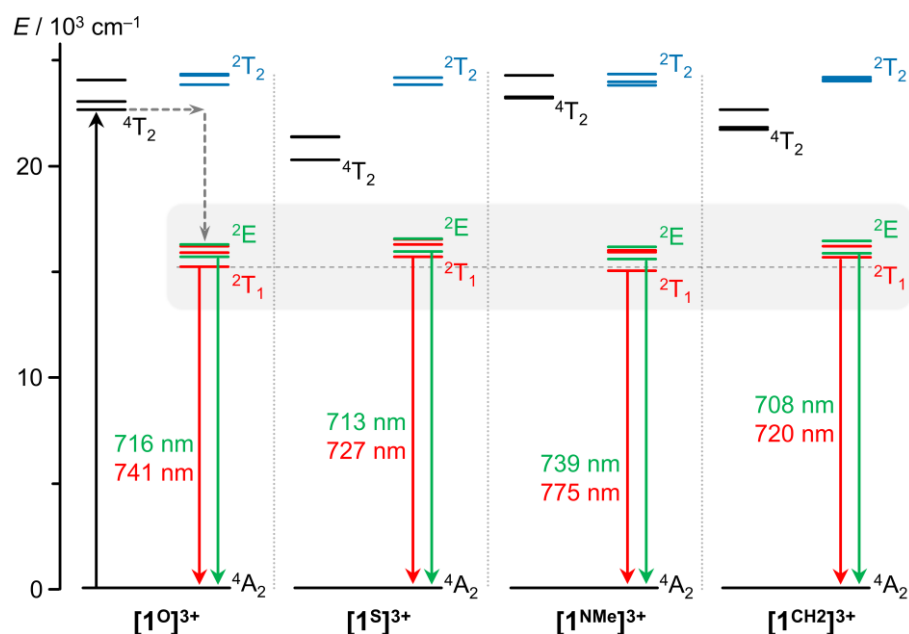

**Fig. S41** CASSCF(7,12)-SC-NEVPT2 calculated energy diagram of the metal centred excited states of the  $[1^X]^{3+}$  complex series with experimental observed maxima of the main room temperature emission bands and arrows indicating excitation (black) inter-system-crossing/internal conversion/vibrational cooling (dotted) and emission (red from  ${}^2T_1$ , green from  ${}^2E$ ).

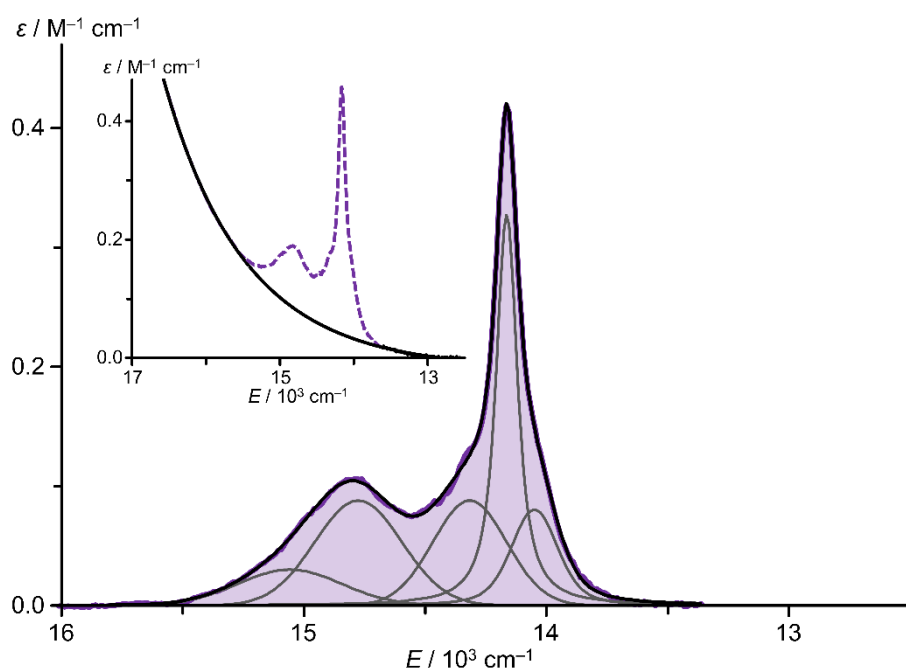

**Fig. S42** Baseline corrected NIR absorption spectra of  $[1^{\text{CH}_2}][\text{OTf}]_3$  (purple) in acetonitrile with sum fit (black) consisting of five Voigt functions (grey). Inset: NIR absorption spectra of  $[1^{\text{CH}_2}][\text{OTf}]_3$  (purple, dotted) with exponential fit (black) describing the tail of the spin-allowed transitions used for the baseline correction.

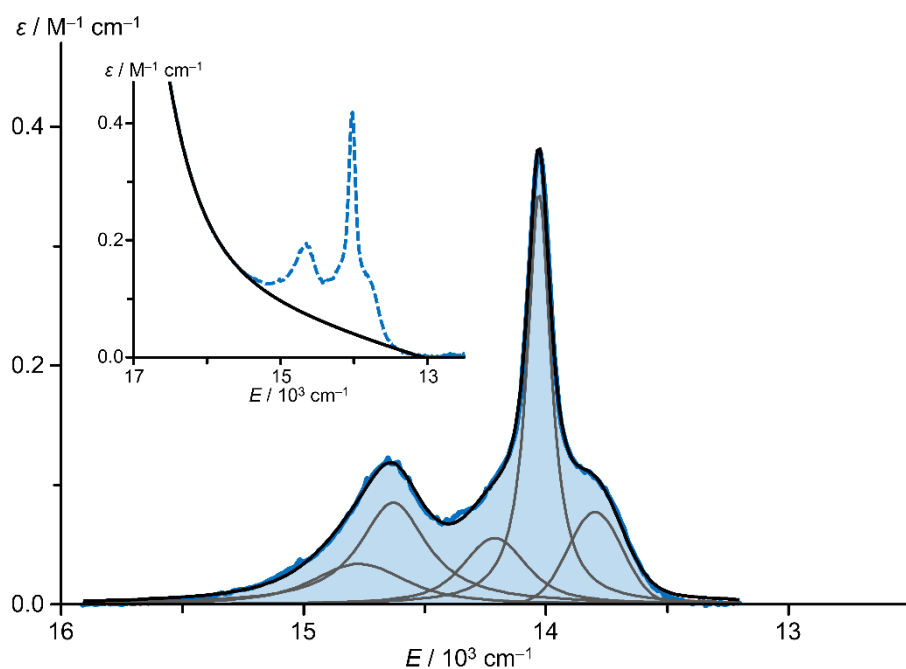

**Fig. S43** Baseline corrected NIR absorption spectra of  $[1^{\text{S}}][\text{OTf}]_3$  (blue) in acetonitrile with sum fit (black) consisting of five Voigt functions (grey). Inset: NIR absorption spectra of  $[1^{\text{S}}][\text{OTf}]_3$  (blue, dotted) with exponential fit (black) describing the tail of the spin-allowed transitions used for the baseline correction.

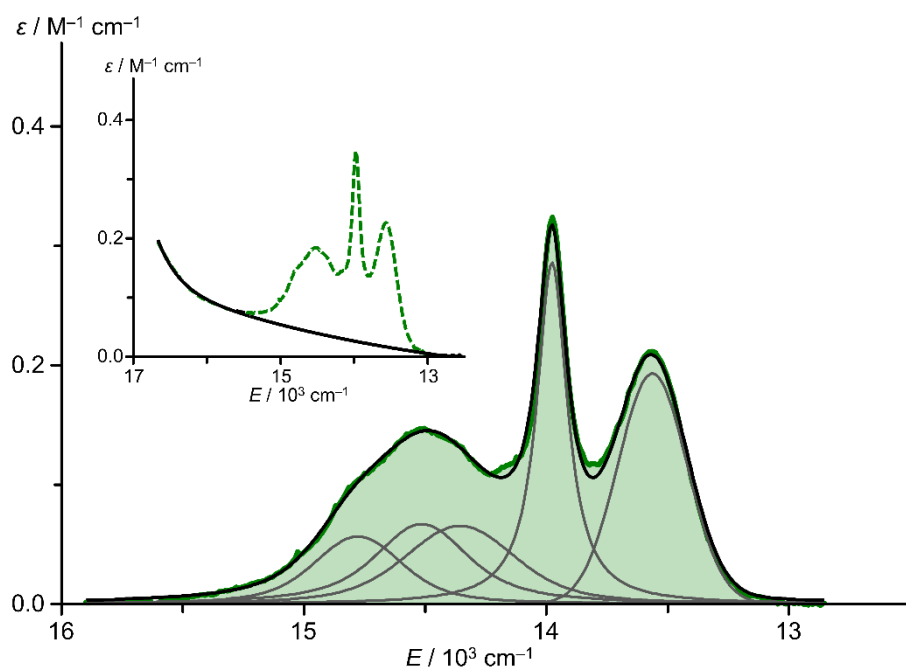

**Fig. S44** Baseline corrected NIR absorption spectra of  $[1^O][OTf]_3$  (green) in acetonitrile with sum fit (black) consisting of five Voigt functions (grey). Inset: NIR absorption spectra of  $[1^O][OTf]_3$  (green, dotted) with exponential fit (black) describing the tail of the spin-allowed transitions used for the baseline correction.

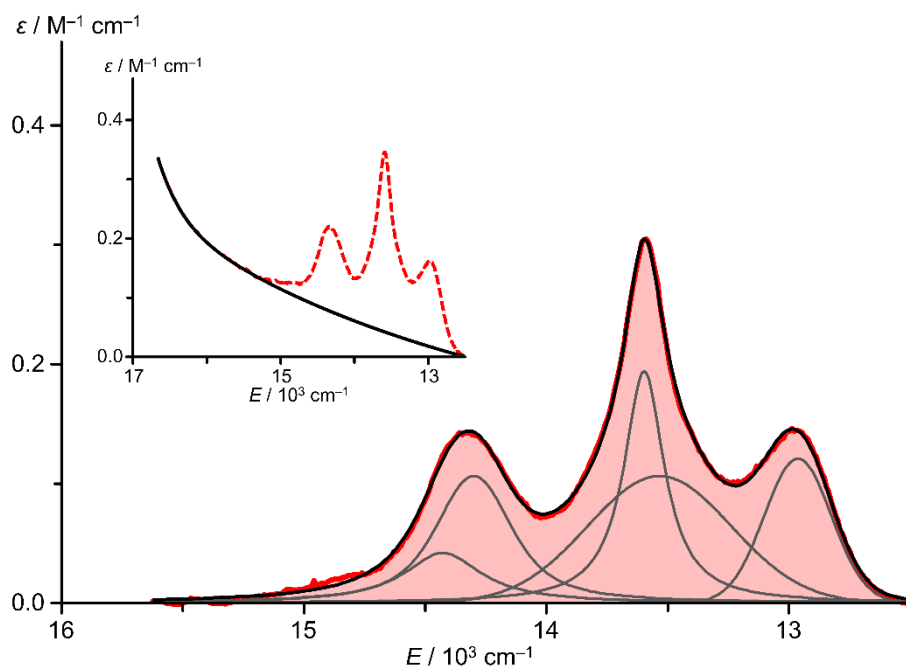

**Fig. S45** Baseline corrected NIR absorption spectra of  $[1^{NMe}][BF_4]_3$  (red) in acetonitrile with sum fit (black) consisting of five Voigt functions (grey). Inset: NIR absorption spectra of  $[1^{NMe}][BF_4]_3$  (red, dotted) with exponential fit (black) describing the tail of the spin-allowed transitions used for the baseline correction.

## Computational studies on the doublet energies

**Table S6** CASSCF(7,12)-SC/NEVPT2 results of the complex series  $[1^X]^{3+}$  at DFT optimised geometries of the four Molecular Rubies with energies in  $\text{cm}^{-1}$  (bold values indicate the lowest state of each multiplicity).

| $[1^X]^{3+}$             | Geo.                     | ${}^2E(1)$ | ${}^2E(2)$ | ${}^2T_1(1)$ | ${}^2T_1(2)$ | ${}^2T_1(3)$ | ${}^2T_2(1)$ | ${}^2T_2(2)$ | ${}^2T_2(3)$ | ${}^4T_2(1)$ | ${}^4T_2(2)$ | ${}^4T_2(3)$ |
|--------------------------|--------------------------|------------|------------|--------------|--------------|--------------|--------------|--------------|--------------|--------------|--------------|--------------|
| $[1^O]^{3+}$             | $[1^O]^{3+}$             | 15726      | 16299      | <b>15265</b> | 15915        | 16206        | 23861        | 24310        | 24334        | <b>22664</b> | 23047        | 24073        |
|                          | $[1^S]^{3+}$             | 16089      | 16678      | <b>15944</b> | 16396        | 16735        | 23926        | 24100        | 24290        | <b>19584</b> | 20500        | 20824        |
|                          | $[1^{\text{NMe}}]^{3+}$  | 15650      | 16215      | <b>15131</b> | 15892        | 16170        | 23923        | 24004        | 24336        | <b>23139</b> | 23235        | 24299        |
|                          | $[1^{\text{CH}_2}]^{3+}$ | 16000      | 16574      | <b>15838</b> | 16258        | 16593        | 24129        | 24136        | 24196        | <b>20907</b> | 21266        | 21770        |
| $[1^S]^{3+}$             | $[1^O]^{3+}$             | 15378      | 15920      | <b>14183</b> | 15436        | 15580        | 23569        | 23951        | 24622        | <b>23222</b> | 23249        | 24567        |
|                          | $[1^S]^{3+}$             | 15958      | 16544      | <b>15725</b> | 16292        | 16568        | 23835        | 24178        | 24186        | <b>20293</b> | 21372        | 21393        |
|                          | $[1^{\text{NMe}}]^{3+}$  | 15313      | 15868      | <b>14050</b> | 15392        | 15467        | 23558        | 23841        | 24666        | <b>23312</b> | 23748        | 24691        |
|                          | $[1^{\text{CH}_2}]^{3+}$ | 15759      | 16325      | <b>15433</b> | 16064        | 16290        | 23834        | 23988        | 24064        | <b>21506</b> | 22016        | 22594        |
| $[1^{\text{NMe}}]^{3+}$  | $[1^O]^{3+}$             | 15669      | 16257      | <b>15224</b> | 15983        | 16115        | 23796        | 24172        | 24324        | <b>22674</b> | 23213        | 24130        |
|                          | $[1^S]^{3+}$             | 16040      | 16622      | <b>15882</b> | 16374        | 16677        | 23892        | 24149        | 24253        | <b>20119</b> | 20981        | 21047        |
|                          | $[1^{\text{NMe}}]^{3+}$  | 15597      | 16180      | <b>15051</b> | 15928        | 16011        | 23823        | 23984        | 24361        | <b>23216</b> | 23262        | 24310        |
|                          | $[1^{\text{CH}_2}]^{3+}$ | 15958      | 16535      | <b>15796</b> | 16293        | 16555        | 24041        | 24132        | 24145        | <b>21141</b> | 21344        | 21982        |
| $[1^{\text{CH}_2}]^{3+}$ | $[1^O]^{3+}$             | 15599      | 16159      | <b>15078</b> | 15832        | 16035        | 23746        | 24159        | 24327        | <b>23045</b> | 23916        | 24780        |
|                          | $[1^S]^{3+}$             | 16006      | 16585      | <b>15868</b> | 16376        | 16633        | 23868        | 24185        | 24256        | <b>20689</b> | 21169        | 21534        |
|                          | $[1^{\text{NMe}}]^{3+}$  | 15522      | 16088      | <b>14933</b> | 15799        | 15936        | 23780        | 23927        | 24342        | <b>23529</b> | 24048        | 24975        |
|                          | $[1^{\text{CH}_2}]^{3+}$ | 15882      | 16454      | <b>15691</b> | 16208        | 16467        | 24006        | 24085        | 24208        | <b>21727</b> | 21840        | 22679        |

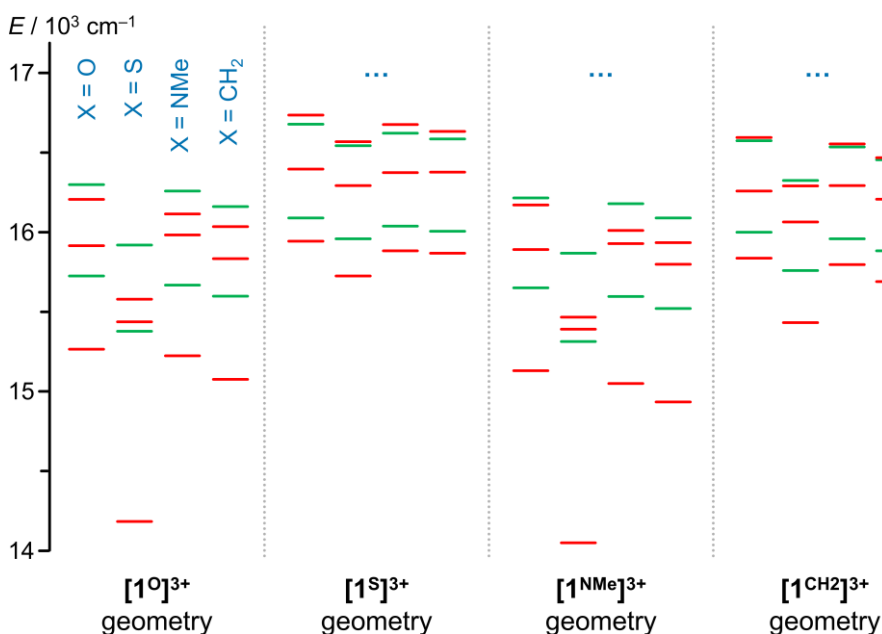

**Fig. S46** CASSCF(7,12)-SC-NEVPT2 calculated  ${}^2T_1$  (red) and  ${}^2E$  energies (green) of  $[1^X]^{3+}$  (X = O, S, NMe, CH<sub>2</sub>) at DFT-optimised geometries of  $[1^X]^{3+}$  (X = O, S, NMe, CH<sub>2</sub>) – X substitution at fixed geometry.

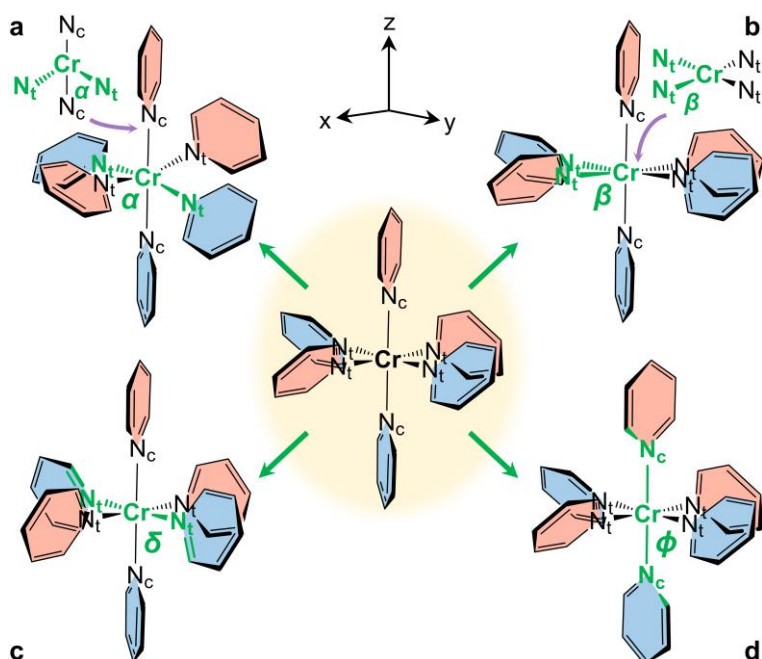

**Fig. S47** Parameters  $\alpha$ ,  $\beta$ ,  $\delta$  and  $\phi$  used for characterising the structure of the Molecular Rubies  $[1^X]^{3+}$  ( $X = S, O, NMe, CH_2$ ) illustrated on the reference  $[Cr(py)_6]^{3+}$ . The structures demonstrate, which structural modifications were performed on the reference system  $[Cr(py)_6]^{3+}$  to investigate their influence on the doublet energies: Compression of the angle  $\alpha$  to yield  $N_t$  distortion within the  $xz/yz$  plane (a); compression of the angle  $\beta$  to yield  $N_t$  distortion within the  $xy$  plane (b); torsion  $\delta$  of the terminal pyridine (c); torsion  $\phi$  of the central pyridines (d).

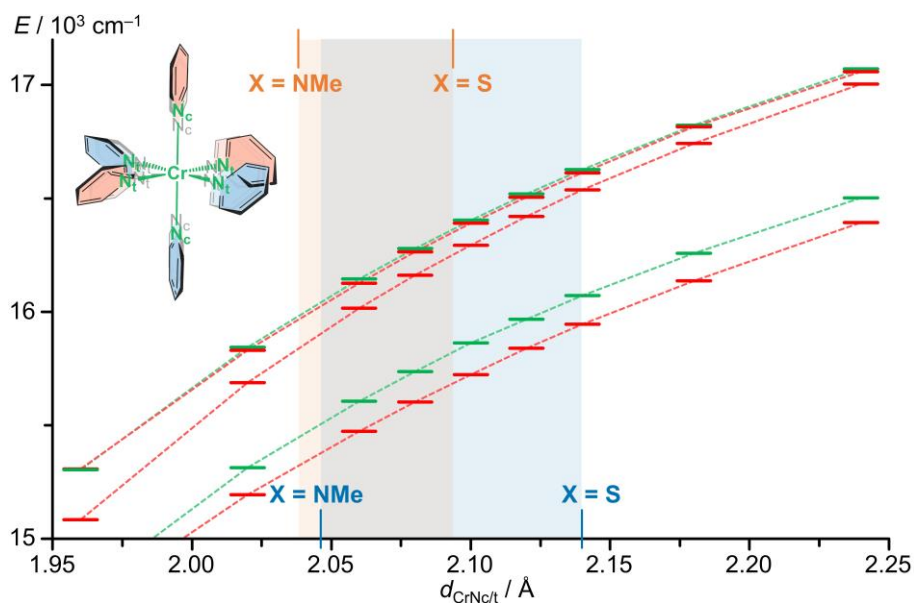

**Fig. S48** CASSCF(7,12)-SC-NEVPT2 results of the model  $[Cr(py)_6]^{3+}$  showing the dependence of the  ${}^2T_1$  (red) and  ${}^2E$  energies (green) on the  $Cr-N_{c/t}$  elongation in local  $O_h$  symmetry including structures illustrating the geometry modification. The corresponding parameter for  $[1^X]^{3+}$  falls within the blue and orange shaded regions according to CASSCF(7,12)-SC-NEVPT2 calculations and the crystal structures.

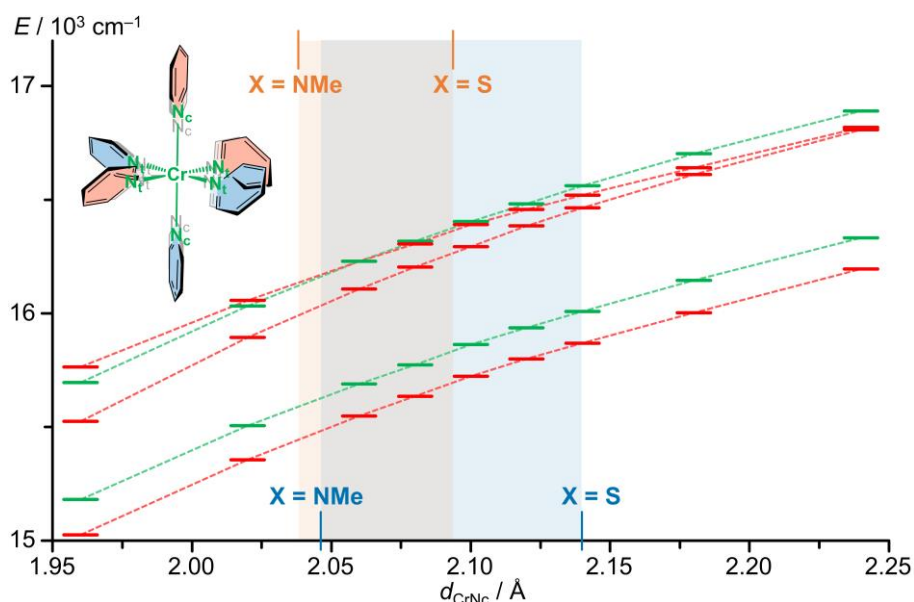

**Fig. S49** CASSCF(7,12)-SC-NEVPT2 results of the model  $[\text{Cr}(\text{py})_6]^{3+}$  showing the dependence of the  ${}^2T_1$  (red) and  ${}^2E$  energies (green) on the  $\text{Cr}-\text{N}_{c/t}$  elongation in local  $D_{4h}$  symmetry including structures illustrating the geometry modification. The corresponding parameter for  $[\mathbf{1}^X]^{3+}$  falls within the blue and orange shaded regions according to CASSCF(7,12)-SC-NEVPT2 calculations and the crystal structures.

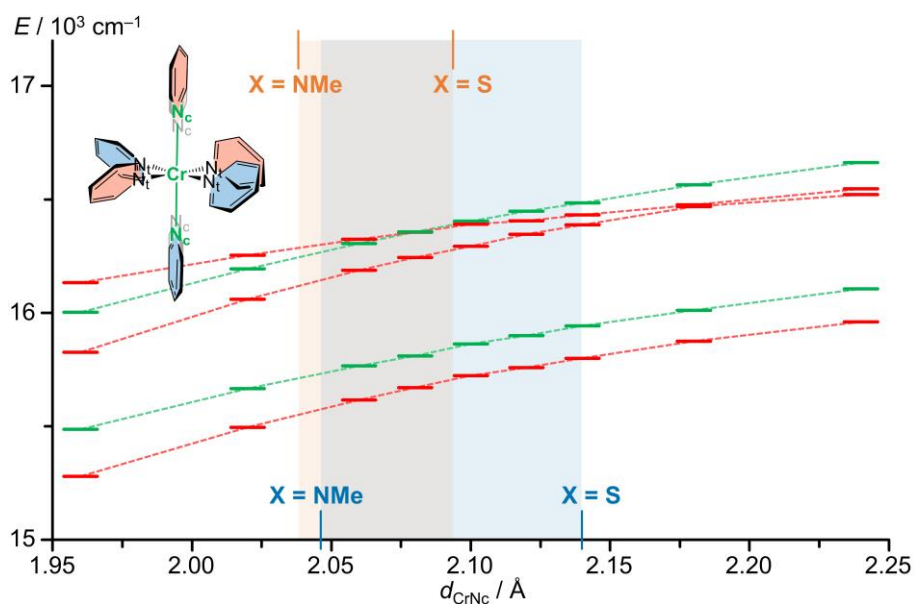

**Fig. S50** CASSCF(7,12)-SC-NEVPT2 results of the model  $[\text{Cr}(\text{py})_6]^{3+}$  showing the dependence of the  ${}^2T_1$  (red) and  ${}^2E$  energies (green) on the  $\text{Cr}-\text{N}_c$  elongation including structures illustrating the geometry modification. The corresponding parameter for  $[\mathbf{1}^X]^{3+}$  falls within the blue and orange shaded regions according to CASSCF(7,12)-SC-NEVPT2 calculations and the crystal structures.

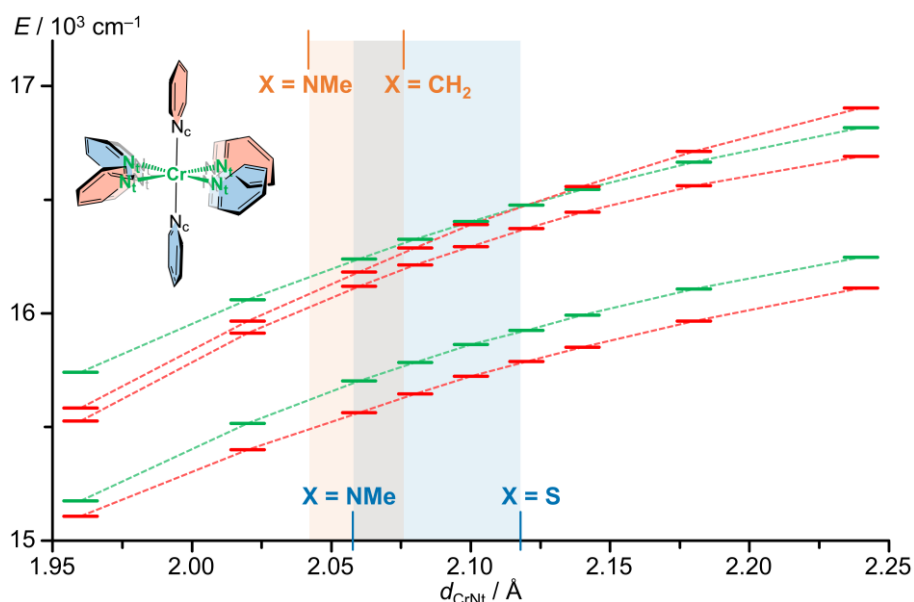

**Fig. S51** CASSCF(7,12)-SC-NEVPT2 results of the model  $[\text{Cr}(\text{py})_6]^{3+}$  showing the dependence of the  ${}^2T_1$  (red) and  ${}^2E$  energies (green) on the  $\text{Cr}-\text{N}_i$  elongation including structures illustrating the geometry modification. The corresponding parameter for  $[\mathbf{1}^X]^{3+}$  falls within the blue and orange shaded regions according to CASSCF(7,12)-SC-NEVPT2 calculations and the crystal structures.

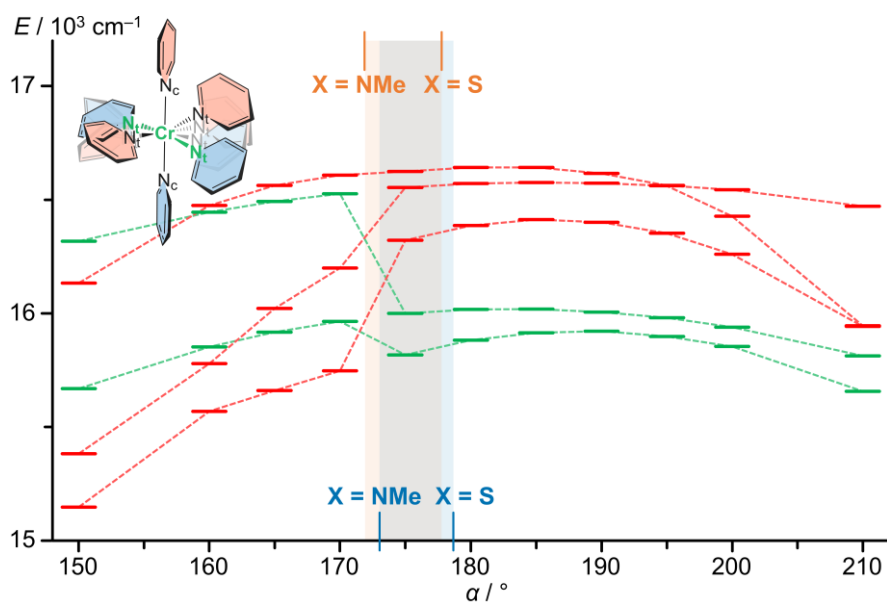

**Fig. S52** CASSCF(7,12)-SC-NEVPT2 results of the model  $[\text{Cr}(\text{py})_6]^{3+}$  showing the dependence of the  ${}^2T_1$  (red) and  ${}^2E$  energies (green) on the  $\text{N}_i$  distortion within the  $xz/yz$  plane including structures illustrating the geometry modification. The corresponding parameter for  $[\mathbf{1}^X]^{3+}$  falls within the blue and orange shaded regions according to CASSCF(7,12)-SC-NEVPT2 calculations and the crystal structures.



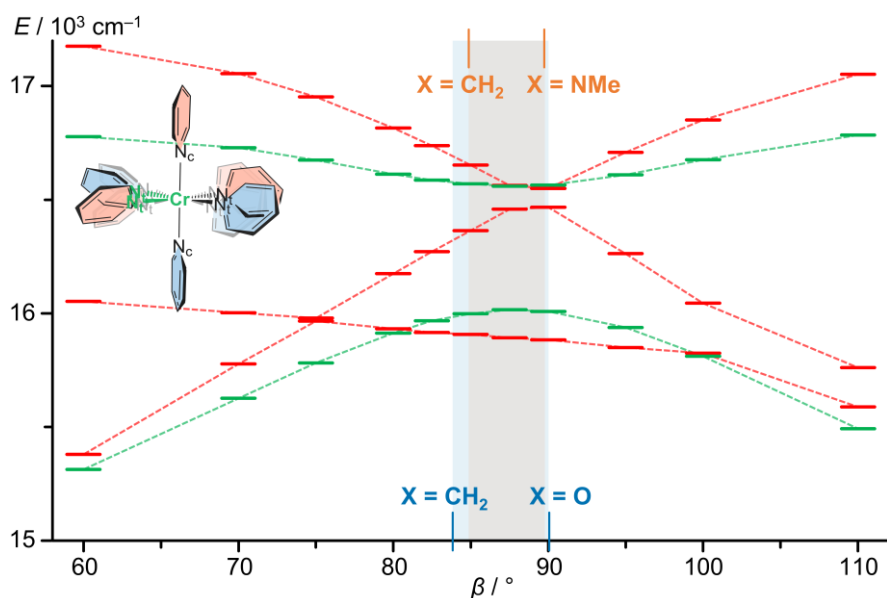

**Fig. S53** CASSCF(7,12)-SC-NEVPT2 results of the model  $[\text{Cr}(\text{py})_6]^{3+}$  showing the dependence of the  ${}^2T_1$  (red) and  ${}^2E$  energies (green) on the  $N_t$  distortion within the  $xy$  plane including structures illustrating the geometry modification. The corresponding parameter for  $[\mathbf{1}^X]^{3+}$  falls within the blue and orange shaded regions according to CASSCF(7,12)-SC-NEVPT2 calculations and the crystal structures.

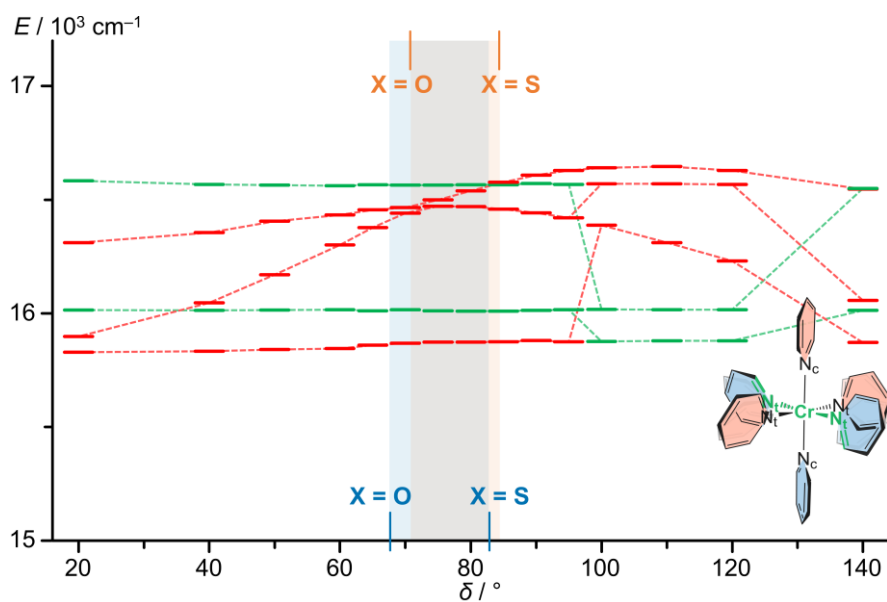

**Fig. S54** CASSCF(7,12)-SC-NEVPT2 results of the model  $[\text{Cr}(\text{py})_6]^{3+}$  showing the dependence of the  ${}^2T_1$  (red) and  ${}^2E$  energies (green) on the torsion of the terminal pyridines ( $\phi = 19^\circ$ ) including structures illustrating the geometry modification. The corresponding parameter for  $[\mathbf{1}^X]^{3+}$  falls within the blue and orange shaded regions according to CASSCF(7,12)-SC-NEVPT2 calculations and the crystal structures.

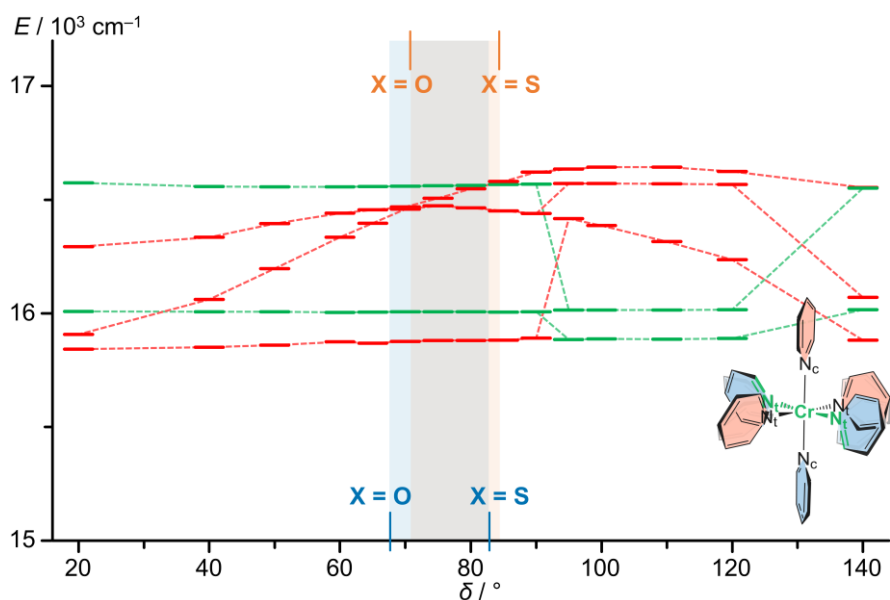

**Fig. S55** CASSCF(7,12)-SC-NEVPT2 results of the model  $[\text{Cr}(\text{py})_6]^{3+}$  showing the dependence of the  ${}^2T_1$  (red) and  ${}^2E$  energies (green) on the torsion of the terminal pyridines ( $\phi = 26^\circ$ ) including structures illustrating the geometry modification. The corresponding parameter for  $[\mathbf{1}^X]^{3+}$  falls within the blue and orange shaded regions according to CASSCF(7,12)-SC-NEVPT2 calculations and the crystal structures.

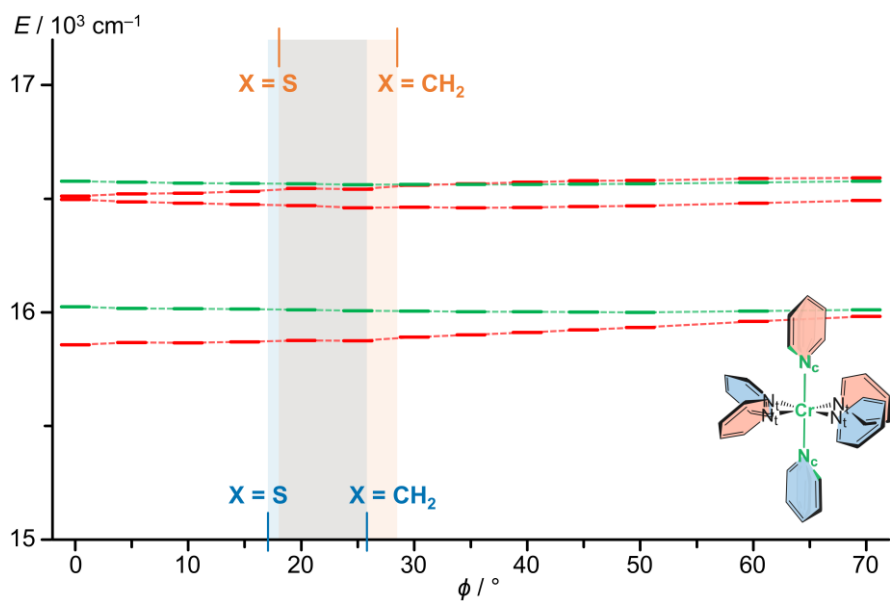

**Fig. S56** CASSCF(7,12)-SC-NEVPT2 results of the model  $[\text{Cr}(\text{py})_6]^{3+}$  showing the dependence of the  ${}^2T_1$  (red) and  ${}^2E$  energies (green) on the torsion of the central pyridines ( $\delta = 80^\circ$ ) including structures illustrating the geometry modification. The corresponding parameter for  $[\mathbf{1}^X]^{3+}$  falls within the blue and orange shaded regions according to CASSCF(7,12)-SC-NEVPT2 calculations and the crystal structures.

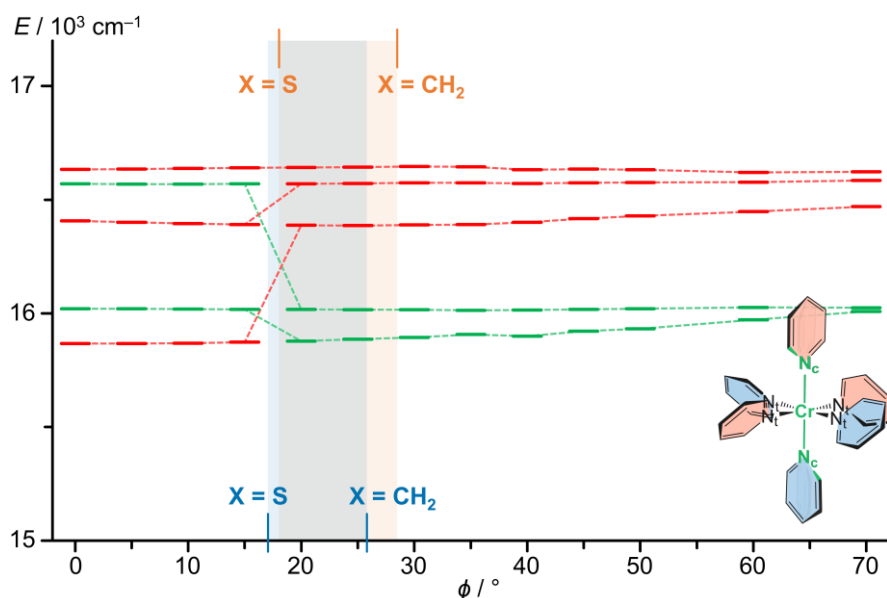

**Fig. S57** CASSCF(7,12)-SC-NEVPT2 results of the model  $[\text{Cr}(\text{py})_6]^{3+}$  showing the dependence of the  ${}^2T_1$  (red) and  ${}^2E$  energies (green) on the torsion of the central pyridines ( $\delta = 100^\circ$ ) including structure illustrating the geometry modification. The corresponding parameter for  $[\mathbf{1}^X]^{3+}$  falls within the blue and orange shaded regions according to CASSCF(7,12)-SC-NEVPT2 calculations and the crystal structures.

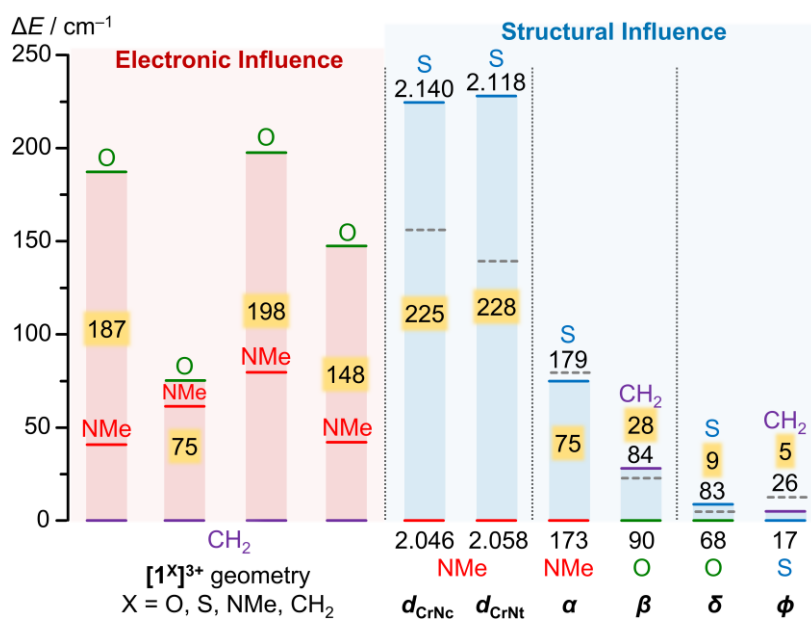

**Fig. S58** Electronic and structural impact on the relative CASSCF(7,12)-SC-NEVPT2 energies of the lowest doublet states. The bridging groups X are indicated at the top and bottom of each column define the constitution at minimal and maximal energy and are described by bond lengths (in Å) and angles (in °). The maximum energy shifts  $\Delta E$  highlighted in yellow are given in  $\text{cm}^{-1}$ . Left:  $[\mathbf{1}^X]^{3+}$  (X = O: green; X = NMe: red; X = CH<sub>2</sub>: purple). Right:  $[\text{Cr}(\text{py})_6]^{3+}$  with structural parameters taken from of the geometries of  $[\mathbf{1}^X]^{3+}$  with X = O, S, NMe, CH<sub>2</sub> (green, blue, red, purple).

## Computational studies on the quartet states

**Table S7** Bond lengths of TD-DFT optimised geometries of quartet states of the complex series  $[1^X]^{3+}$  (bold values indicate largest bond elongations) with single point energy differences between the excited quartet states  ${}^4\text{ES}$  and the lowest optimised doublet state  ${}^2\text{E}$ . Distances are given in Å and energies in eV. The colour code corresponds to the different tridentate ligands.

| character                                  | Cr–N5 (N <sub>t</sub> ) | Cr–N2 (N <sub>c</sub> ) | Cr–N4 (N <sub>t</sub> ) | Cr–N7 (N <sub>t</sub> ) | Cr–N3 (N <sub>c</sub> ) | Cr–N6 (N <sub>t</sub> ) | $\Delta E$ ( ${}^4\text{ES}-{}^2\text{E}$ ) |
|--------------------------------------------|-------------------------|-------------------------|-------------------------|-------------------------|-------------------------|-------------------------|---------------------------------------------|
| <b><math>[1^{\text{O}}]^{3+}</math></b>    |                         |                         |                         |                         |                         |                         |                                             |
| ${}^4\text{A}_2$                           | 2.071                   | 2.051                   | 2.071                   | 2.071                   | 2.051                   | 2.071                   |                                             |
| ${}^4\text{T}_2(1)$                        | 2.049                   | <b>2.107</b>            | 2.049                   | 2.095                   | <b>2.493</b>            | 2.094                   | 1.28                                        |
| ${}^4\text{T}_2(2)$                        | 2.076                   | <b>2.239</b>            | 2.076                   | 2.077                   | <b>2.241</b>            | 2.077                   | 1.39                                        |
| <b><math>[1^{\text{S}}]^{3+}</math></b>    |                         |                         |                         |                         |                         |                         |                                             |
| ${}^4\text{A}_2$                           | 2.118                   | 2.140                   | 2.118                   | 2.118                   | 2.140                   | 2.118                   |                                             |
| ${}^4\text{T}_2(1)$                        | 2.106                   | <b>2.421</b>            | 2.109                   | 2.073                   | <b>2.214</b>            | 2.075                   | 1.17                                        |
| ${}^4\text{T}_2(2)$                        | 2.106                   | <b>2.364</b>            | 2.105                   | 2.078                   | <b>2.238</b>            | 2.080                   | 1.17                                        |
| ${}^4\text{T}_2(3)$                        | 2.086                   | <b>2.265</b>            | 2.086                   | 2.100                   | <b>2.311</b>            | 2.100                   | 1.17                                        |
| ${}^4\text{T}_2(4)$                        | 2.095                   | <b>2.290</b>            | 2.095                   | 2.091                   | <b>2.289</b>            | 2.091                   | 1.17                                        |
| ${}^4\text{LMCT}(1)$                       | 2.123                   | <b>2.356</b>            | 2.123                   | 2.149                   | <b>2.462</b>            | 2.149                   | 1.20                                        |
| ${}^4\text{LMCT}(2)$                       | <b>2.405</b>            | 2.200                   | <b>2.403</b>            | 2.132                   | 2.115                   | 2.134                   | 1.16                                        |
| <b><math>[1^{\text{NMe}}]^{3+}</math></b>  |                         |                         |                         |                         |                         |                         |                                             |
| ${}^4\text{A}_2$                           | 2.058                   | 2.046                   | 2.058                   | 2.058                   | 2.046                   | 2.058                   |                                             |
| ${}^4\text{T}_2$                           | 2.036                   | 2.061                   | 2.036                   | 2.138                   | <b>2.316</b>            | 2.138                   | 1.30                                        |
| ${}^4\text{LMCT}(1)$                       | 2.043                   | 2.059                   | 2.044                   | 2.052                   | 2.045                   | 2.052                   | 1.76                                        |
| ${}^4\text{LMCT}(2)$                       | <b>2.310</b>            | 2.087                   | <b>2.301</b>            | 2.152                   | 2.046                   | 2.112                   | 1.76                                        |
| <b><math>[1^{\text{CH}_2}]^{3+}</math></b> |                         |                         |                         |                         |                         |                         |                                             |
| ${}^4\text{A}_2$                           | 2.113                   | 2.112                   | 2.111                   | 2.110                   | 2.113                   | 2.113                   |                                             |
| ${}^4\text{T}_2$                           | 2.068                   | <b>2.161</b>            | 2.068                   | 2.121                   | <b>2.546</b>            | 2.121                   | 1.54                                        |

## fs-Transient absorption spectroscopy

In order to obtain information on the ultrafast processes after light excitation, we measured femtosecond TA spectra of  $[1^O]^{3+}$  and  $[1^S]^{3+}$ . As the dd absorptions of  $[1^O]^{3+}$  are too weak for obtaining meaningful TA data, TA spectra of  $[1^O]^{3+}$  were recorded in  $\text{CH}_3\text{CN}$  with  $^4\text{LMCT}$  excitation at 343 nm (Fig. S59–S61). Global analysis with a consecutive kinetic model yields two time constants. The initially observed broad excited state absorption (ESA) in the red to NIR spectral region decays with a time constant of  $\tau_1 = 1.0$  ps to a spectrally similar component with a lifetime of  $\tau_2 = 47$  ps. The spectral similarity of the two components decaying with  $\tau_1$  and  $\tau_2$  to the final long-lived state indicates that they belong to similar electronic states, possibly LMCT states. The ultrafast process with the time constant  $\tau_1$  likely corresponds to internal conversion (IC) and vibrational cooling (VC) on the  $^2\text{LMCT}$  manifold. Finally, a blue-shifted signal that does not decay on the timescale of the experiment (8 ns) is obtained. ISC appears to be faster the time resolution of our experiment (200 fs). Due to the higher absorption coefficient of the dd/LMCT band of  $[1^S]^{3+}$ , TA spectra of  $[1^S]^{3+}$  in water were obtained with excitation at 515 nm. The initial TA spectrum features a broad ESA in the green to red spectral region that decays to a long-lived component within  $\tau_1 = 1.2$  ps (Fig. S62–S64). A small spectral shift is associated with a time constant of  $\tau_2 = 90$  ps yielding the non-decaying component, i.e. the characteristics of the long-lived SF states. The TA spectra are qualitatively similar to those of  $[1^{\text{NMe}}]^{3+}$ . Hence, we assign the ultrafast component  $\tau_1$  to ISC from the quartet to the doublet states, which is convoluted with IC/VC within the doublet manifold. The longer component  $\tau_2$  is assigned to reorganization of the solvent cage around the doublet states. The final spectrum that does not decay on the time scale of the experiment corresponds to the emissive SF states.

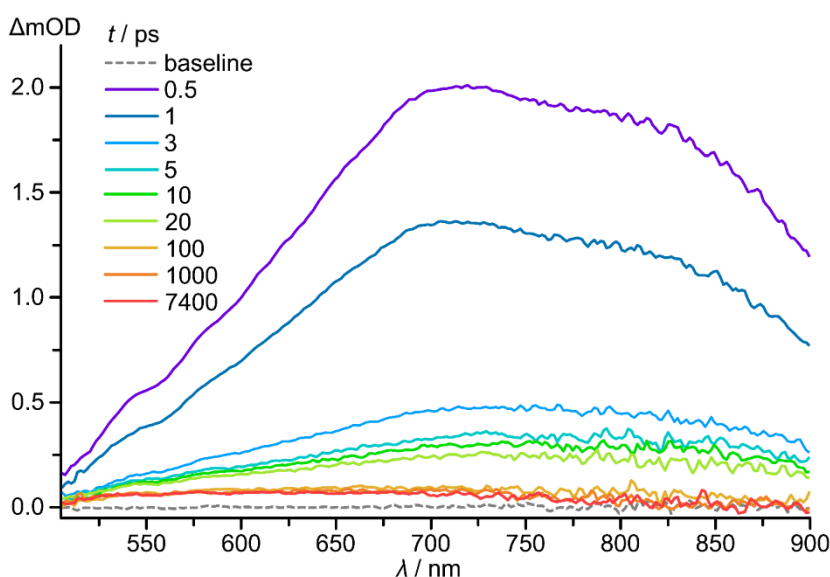

**Fig. S59** Transient absorption spectra of  $[1^O][\text{OTf}]_3$  in acetonitrile after pulsed excitation at 343 nm at various time delays (fluence:  $70 \mu\text{J cm}^{-2}$ , repetition rate: 1 kHz).

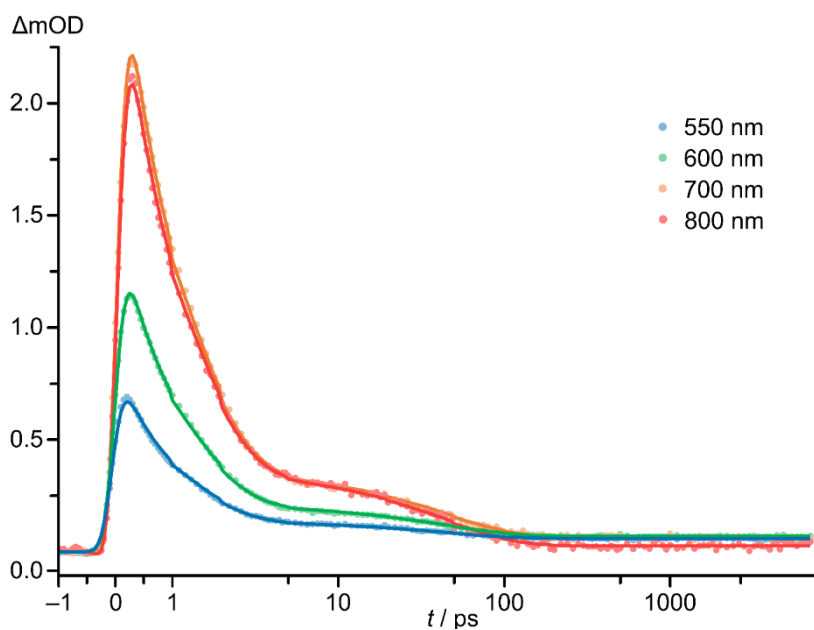

**Fig. S60** Decay traces of excited state absorptions of  $[1^{\circ}][\text{OTf}]_3$  in acetonitrile (coloured symbols) at different wavelengths with global fit (solid lines).

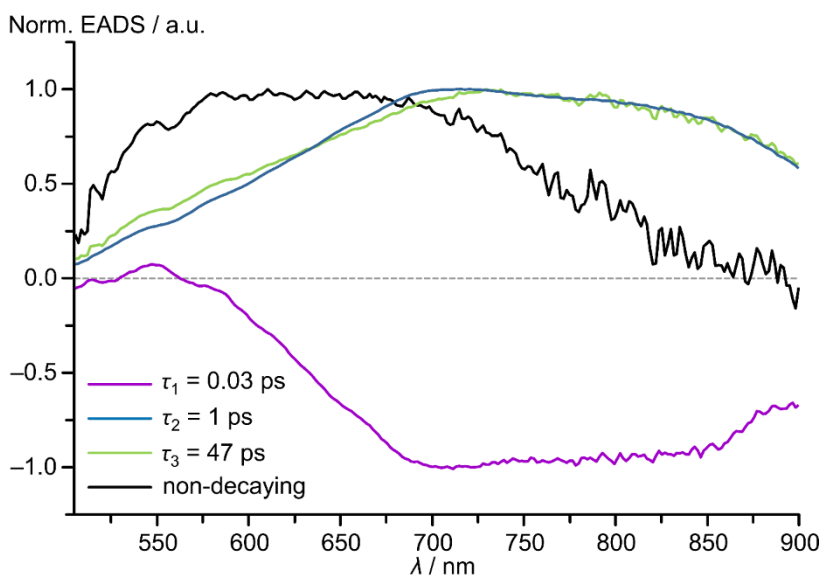

**Fig. S61** Normalised evolution associated difference spectra obtained from a global analysis of transient absorption data of  $[1^{\circ}][\text{OTf}]_3$  (acetonitrile,  $\lambda_{\text{exc}} = 343 \text{ nm}$ , fluence:  $70 \mu\text{J cm}^{-2}$ , repetition rate: 1 kHz).

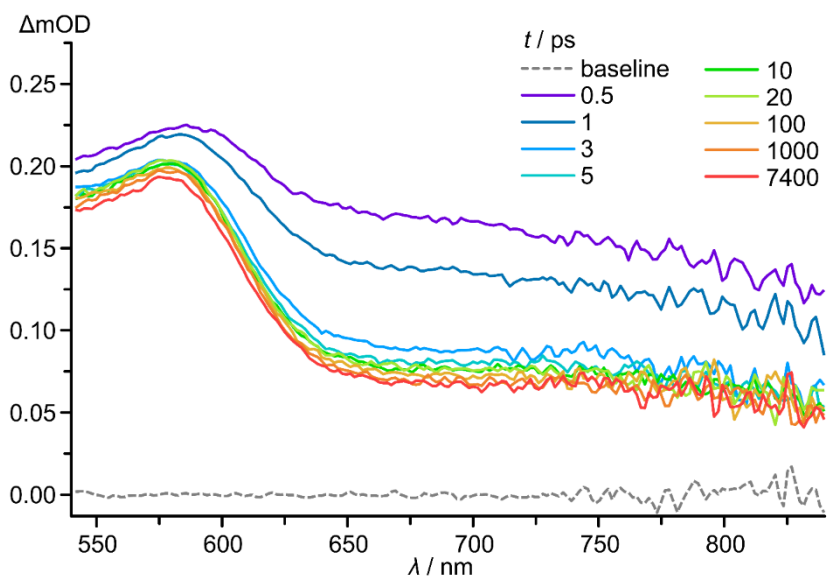

**Fig. S62** Transient absorption spectra of  $[1^S][OTf]_3$  in water after pulsed excitation at 515 nm at various time delays (fluence:  $3 \text{ mJ cm}^{-2}$ , repetition rate: 1 kHz).

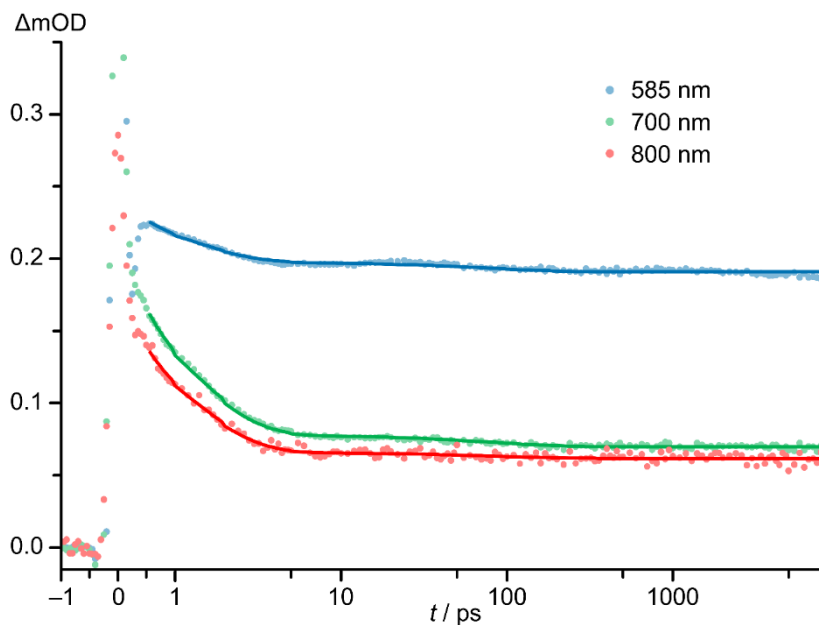

**Fig. S63** Decay traces of excited state absorptions of  $[1^S][OTf]_3$  in water (coloured symbols) at different wavelengths with global fit (solid lines).

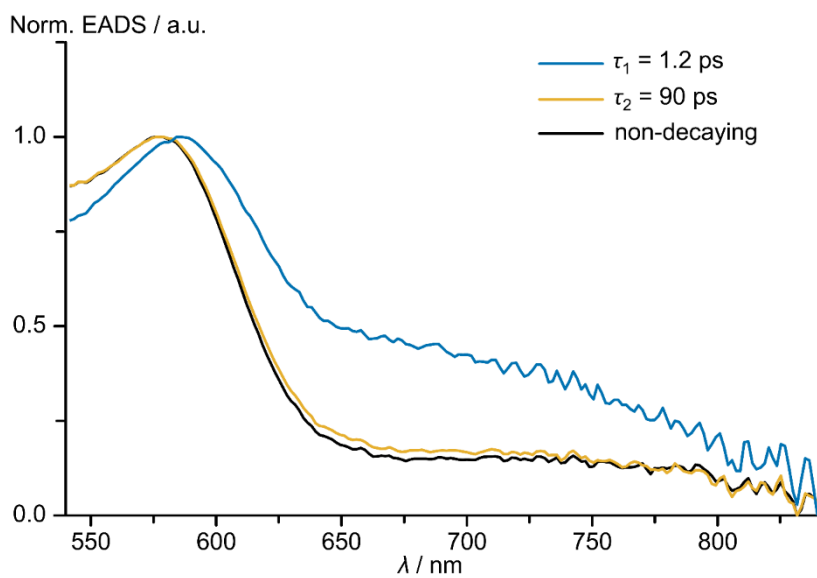

**Fig. S64** Normalised evolution associated difference spectra obtained from a global analysis of transient absorption data of  $[1^9s][OTf]_3$  (water,  $\lambda_{exc} = 515$  nm, fluence:  $3 \text{ mJ cm}^{-2}$ , repetition rate: 1 kHz).



## Variable-temperature emission spectroscopy

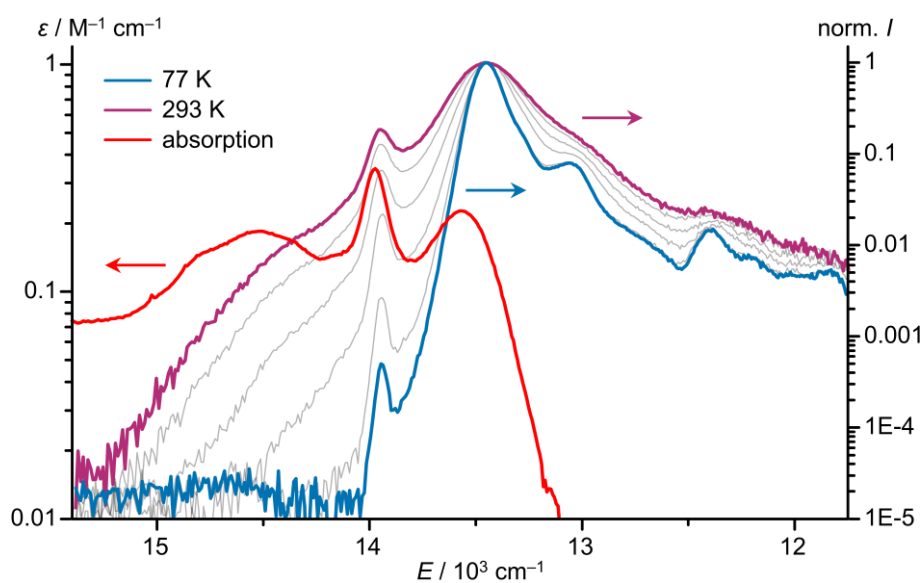

**Fig. S65** Spin- and symmetry forbidden absorption band (logarithmic scale) of an acetonitrile solution (red) and temperature dependent emission spectra ( $\lambda_{exc} = 450$  nm, logarithmic scale) of a (frozen) solution of  $[1^{\circ}][OTf]_3$  in deaerated ethanol/methanol (3:2) at 77 K (blue), 293 K (purple) and temperatures between 77 and 293 K (grey).

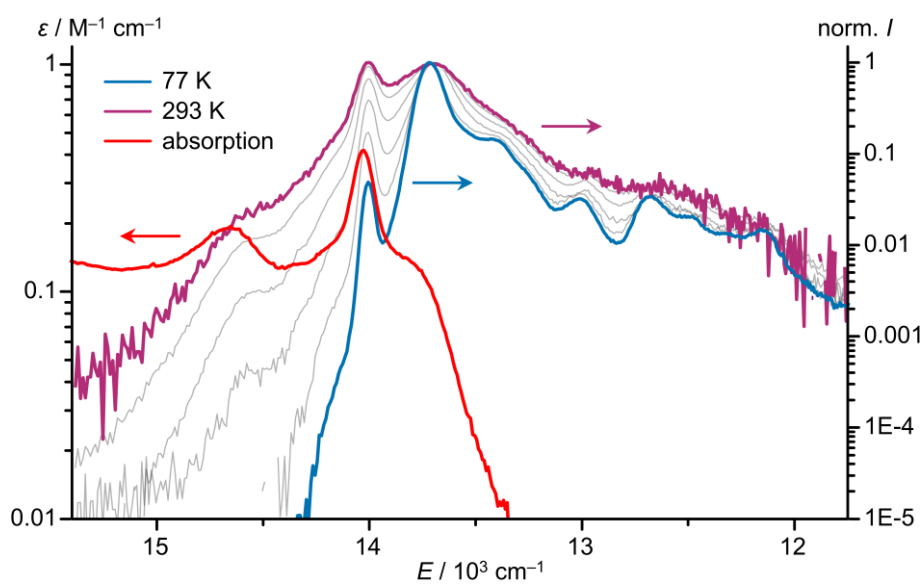

**Fig. S66** Spin- and symmetry forbidden absorption band (logarithmic scale) of an acetonitrile solution (red) and temperature dependent emission spectra ( $\lambda_{exc} = 450$  nm, logarithmic scale) of a (frozen) solution of  $[1^S][OTf]_3$  in deaerated ethanol/methanol (3:2) at 77 K (blue), 293 K (purple) and temperatures between 77 and 293 K (grey).

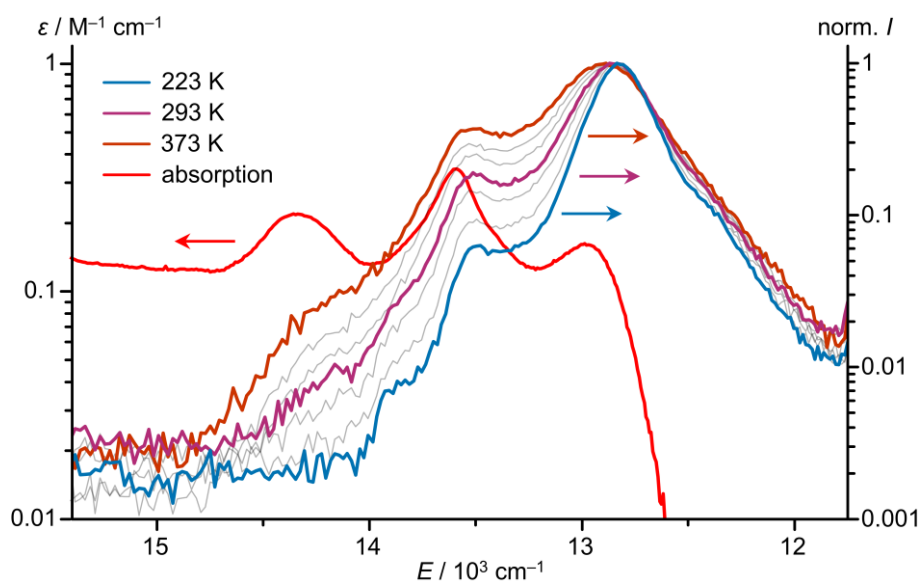

**Fig. S67** Spin- and symmetry forbidden absorption band (logarithmic scale) of an acetonitrile solution (red) and temperature dependent emission spectra ( $\lambda_{exc} = 436$  nm, logarithmic scale) of a solution of  $[1^{NMMe}][BF_4]_3$  in deaerated ethylene glycol/water (2:1) at 223 K (blue), 293 K (purple), 373 K (brown) and temperatures between 223 and 373 K (grey).<sup>44</sup>

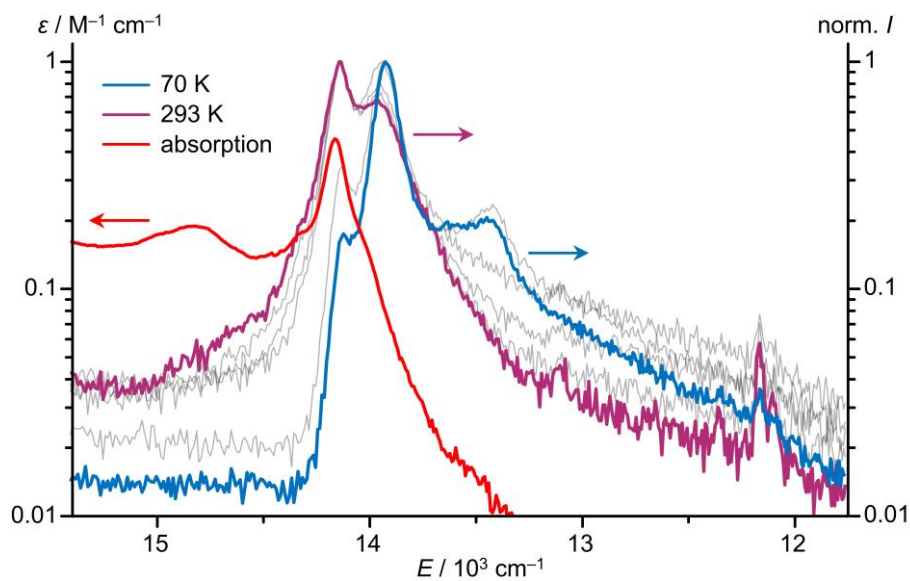

**Fig. S68** Spin- and symmetry forbidden absorption band (logarithmic scale) of an acetonitrile solution (red) and temperature dependent emission spectra ( $\lambda_{exc} = 355$  nm, logarithmic scale) of  $[1^{CH_2}][OTf]_3$  in KBr at 70 K (blue), 293 K (purple) and temperatures between 70 and 293 K (grey).<sup>43</sup>

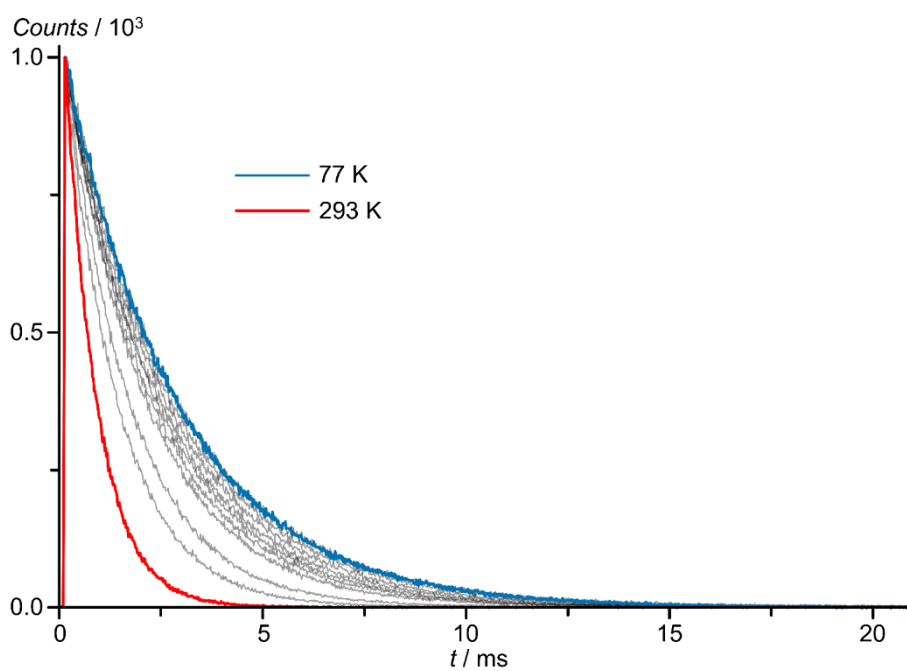

**Fig. S69** Normalised temperature dependent emission decay traces recorded at 742 nm following excitation ( $\lambda_{\text{exc}} = 450$  nm) of a 0.33 mM solution of  $[1^0][\text{OTf}]_3$  in deaerated ethanol/methanol (3:2).

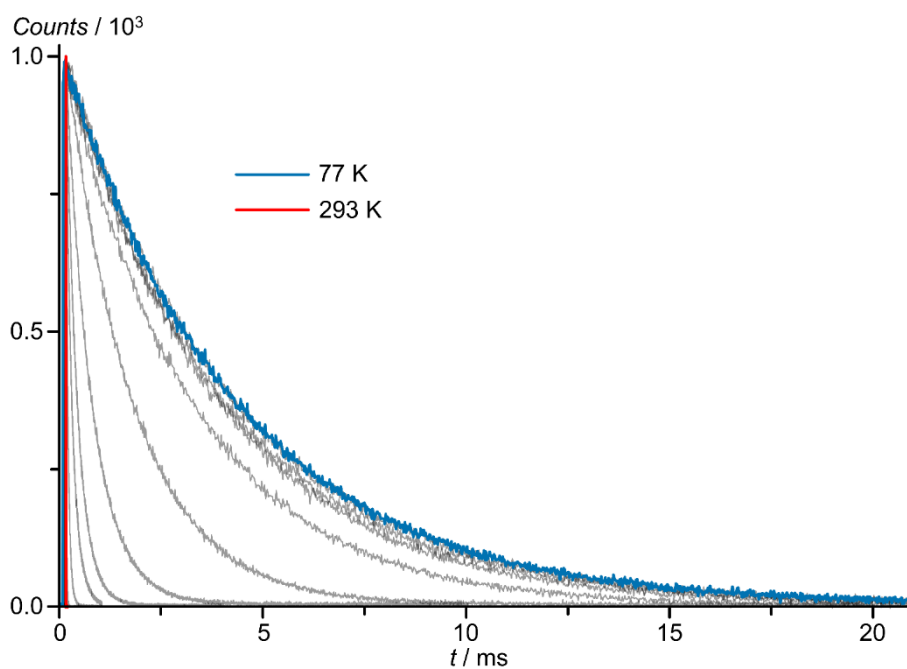

**Fig. S70** Normalised temperature dependent emission decay traces recorded at 729 nm following excitation ( $\lambda_{\text{exc}} = 450$  nm) of a 0.13 mM solution of  $[1^S][\text{OTf}]_3$  in deaerated ethanol/methanol (3:2).

## Photolysis experiments

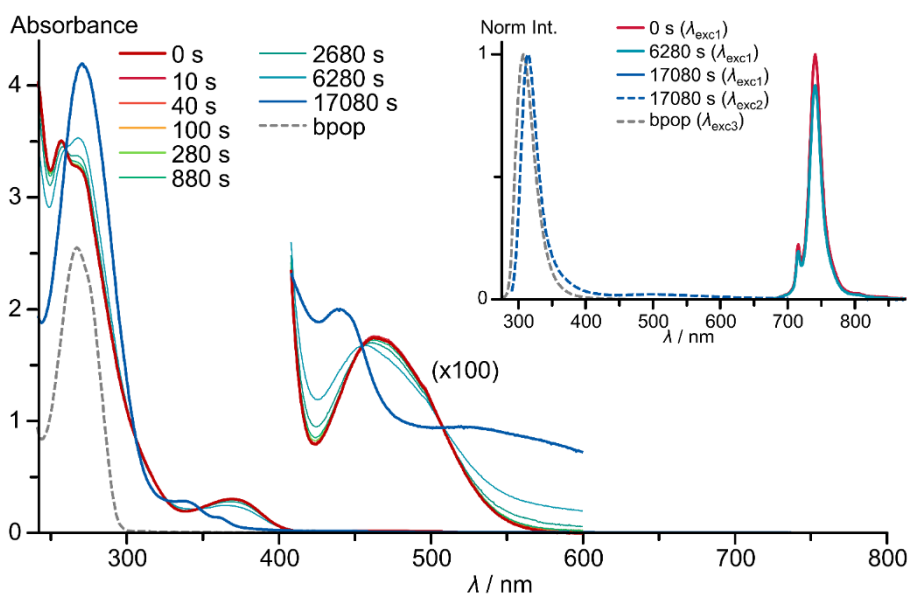

**Fig. S71** UV/VIS/NIR absorption (with zoom) and normalised emission spectra of 0.205 mM  $[1^0][OTf]_3$  in deaerated acetonitrile after different UHP-LED irradiation time periods ( $\lambda_{exc} = 460$  nm) with an output power of 1.1 W and UV/VIS/NIR absorption and normalised emission spectra of bpop in acetonitrile ( $\lambda_{exc1} = 462$  nm,  $\lambda_{exc2} = 270$  nm,  $\lambda_{exc3} = 267$  nm).

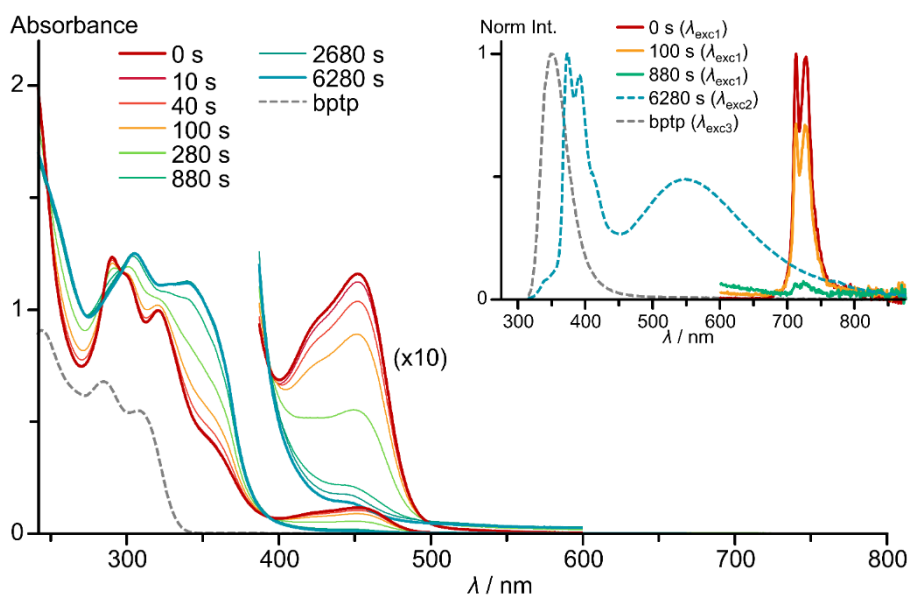

**Fig. S72** UV/VIS/NIR absorption (with zoom) and normalised emission spectra of 0.061 mM  $[1^9][OTf]_3$  in deaerated acetonitrile after different UHP-LED irradiation time periods ( $\lambda_{exc} = 460$  nm) with an output power of 1.1 W and UV/VIS/NIR absorption and normalised emission spectra of bptp in acetonitrile ( $\lambda_{exc1} = 452$  nm,  $\lambda_{exc2} = 308$  nm,  $\lambda_{exc3} = 308$  nm).

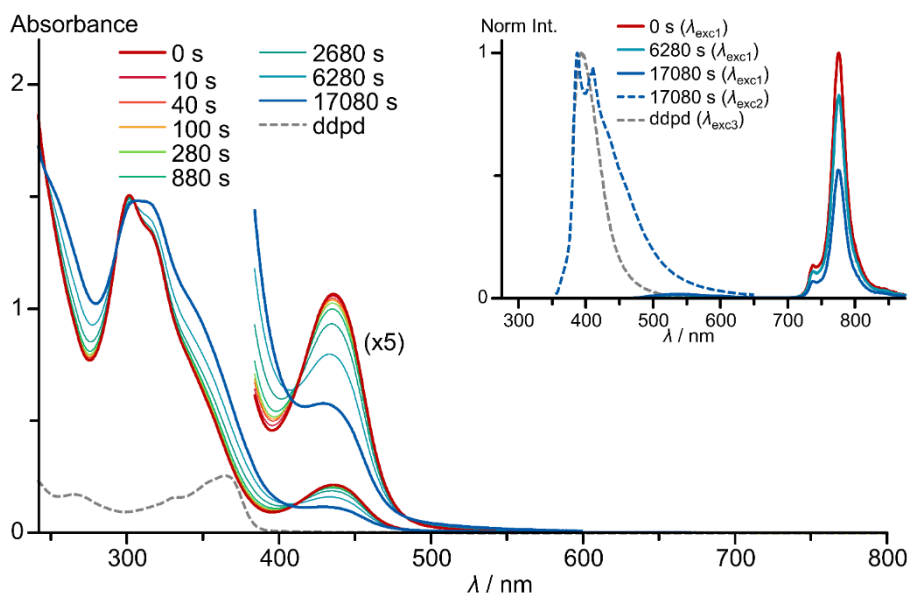

**Fig. S73** UV/VIS/NIR absorption (with zoom) and normalised emission spectra of 0.066 mM  $[1^{NMe}][OTf]_3$  in deaerated acetonitrile after different UHP-LED irradiation time periods ( $\lambda_{exc} = 460$  nm) with an output power of 1.1 W and UV/VIS/NIR absorption and normalised emission spectra of ddpd in dichloromethane ( $\lambda_{exc1} = 436$  nm,  $\lambda_{exc2} = 345$  nm,  $\lambda_{exc3} = 369$  nm).<sup>44</sup>

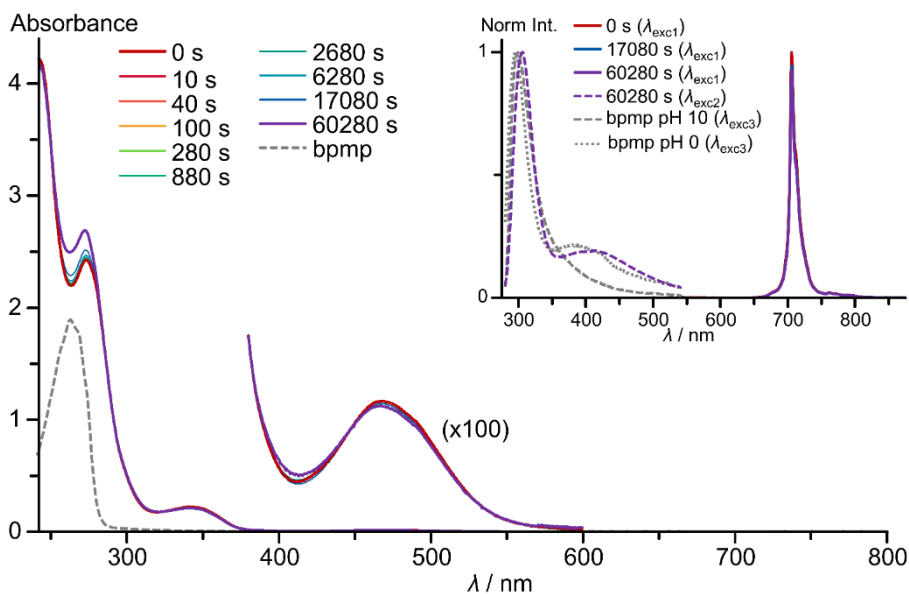

**Fig. S74** UV/VIS/NIR absorption (with zoom) and normalised emission spectra of 0.177 mM  $[1^{CH2}][OTf]_3$  in deaerated acetonitrile after different UHP-LED irradiation time periods ( $\lambda_{exc} = 460$  nm) with an output power of 1.1 W and UV/VIS/NIR absorption and normalised emission spectra of bpmp in water at pH = 0 and pH = 10 ( $\lambda_{exc1} = 467$  nm,  $\lambda_{exc2} = 270$  nm,  $\lambda_{exc3} = 266$  nm).<sup>43</sup>

## Quenching Experiments

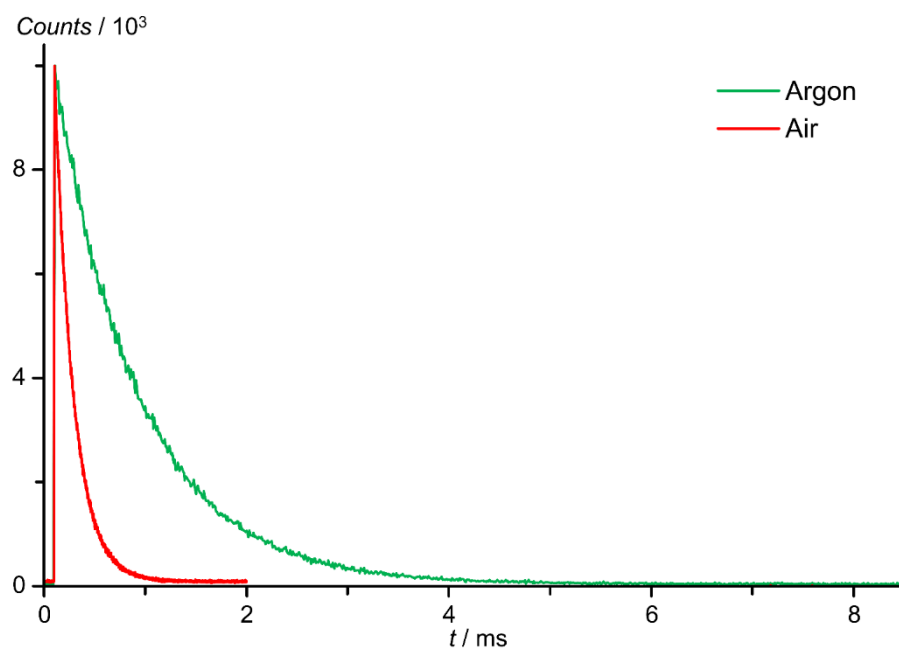

**Fig. S75** Emission decay traces recorded at 742 nm following excitation ( $\lambda_{\text{exc}} = 450$  nm) of a solution of  $[1^{\text{O}}][\text{OTf}]_3$  in deaerated acetonitrile (green) and air saturated acetonitrile (red).

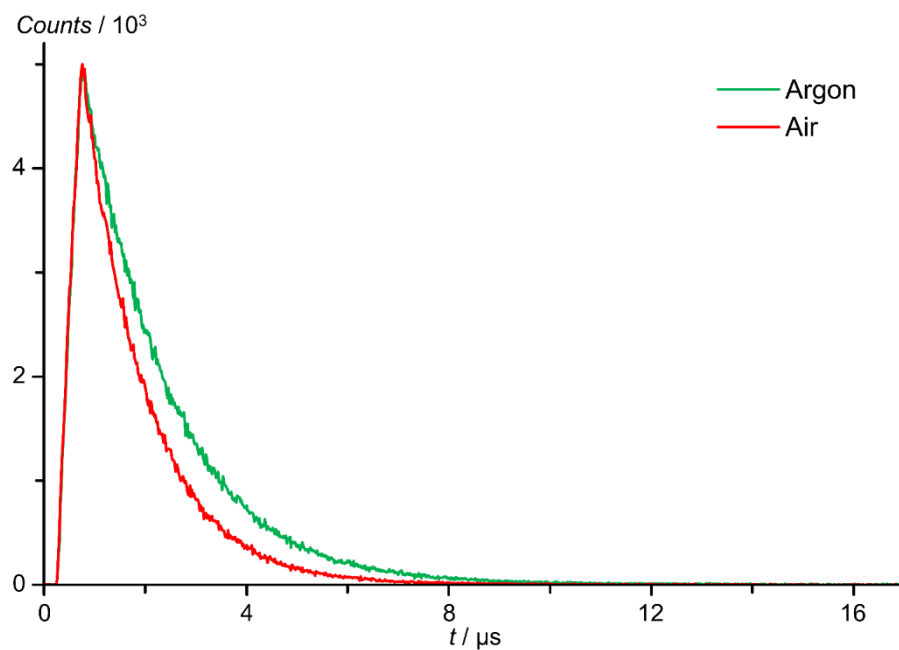

**Fig. S76** Emission decay traces recorded at 729 nm following excitation ( $\lambda_{\text{exc}} = 450$  nm) of a solution of  $[1^{\text{S}}][\text{OTf}]_3$  in deaerated acetonitrile (green) and air saturated acetonitrile (red).

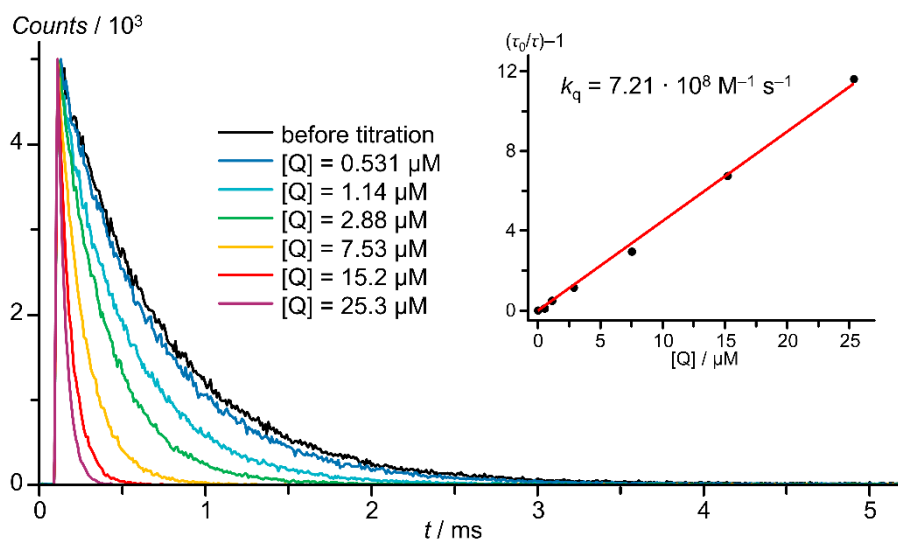

**Fig. S77** Quencher concentration dependent emission decay traces recorded at 742 nm following excitation ( $\lambda_{\text{exc}} = 450 \text{ nm}$ ) of a solution of  $[1^0][\text{OTf}]_3$  in deaerated acetonitrile for Stern-Volmer analysis with anthracene and the corresponding Stern-Volmer plot with linear fit (red line).

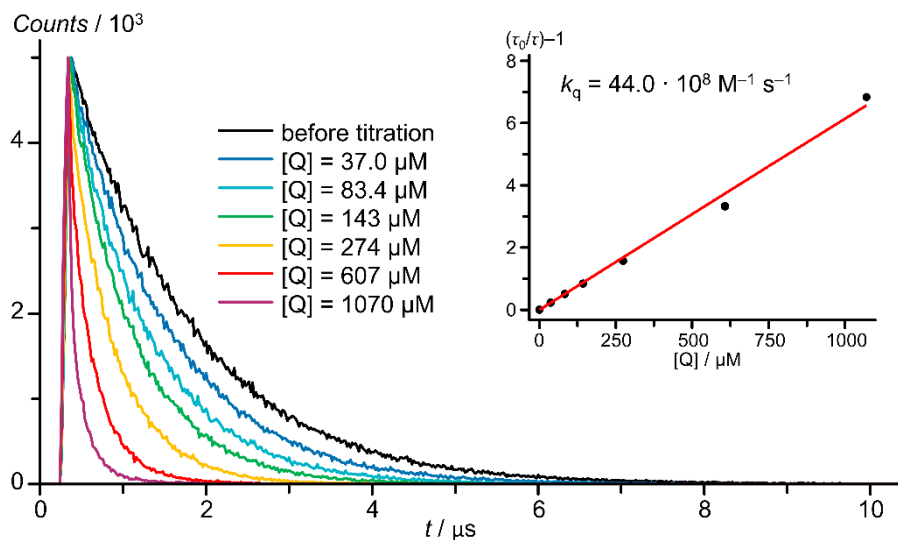

**Fig. S78** Quencher concentration dependent emission decay traces recorded at 729 nm following excitation ( $\lambda_{\text{exc}} = 450 \text{ nm}$ ) of a solution of  $[1^S][\text{OTf}]_3$  in deaerated acetonitrile for Stern-Volmer analysis with anthracene and the corresponding Stern-Volmer plot with linear fit (red line).

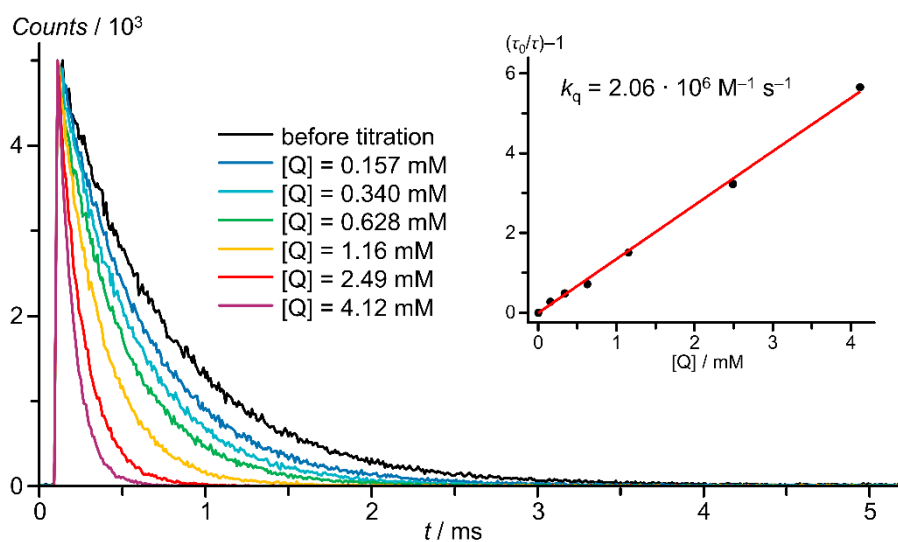

**Fig. S79** Quencher concentration dependent emission decay traces recorded at 742 nm following excitation ( $\lambda_{exc} = 450 \text{ nm}$ ) of a solution of  $[1^O][OTf]_3$  in deaerated acetonitrile for Stern-Volmer analysis with trans-stilbene and the corresponding Stern-Volmer plot with linear fit (red line).

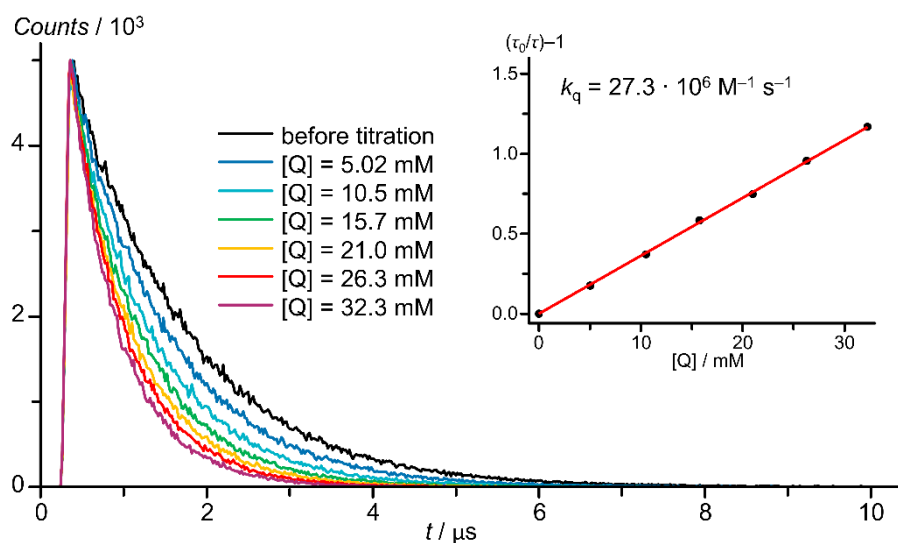

**Fig. S80** Quencher concentration dependent emission decay traces recorded at 729 nm following excitation ( $\lambda_{exc} = 450 \text{ nm}$ ) of a solution of  $[1^S][OTf]_3$  in deaerated acetonitrile for Stern-Volmer analysis with trans-stilbene and the corresponding Stern-Volmer plot with linear fit (red line).



## References

- [1] H. E. Gottlieb, V. Kotlyar and A. Nudelman, *J. Org. Chem.*, 1997, **62**, 7512–7515.
- [2] F. Barigelletti, D. Sandrini, M. Maestri, V. Balzani, A. von Zelewsky, L. Chassot, P. Jolliet and U. Maeder, *Inorg. Chem.*, 1988, **27**, 3644–3647.
- [3] C. Müller, T. Pascher, A. Eriksson, P. Chabera and J. Uhlig, *J. Phys. Chem. A*, 2022, **126**, 4087–4099.
- [4] J. R. Lakowicz, *Principles of Fluorescence Spectroscopy*, Springer, New York, 2010.
- [5] F. Neese, *WIREs Comp. Mol. Sci.*, 2012, **2**, 73–78.
- [6] F. Neese, *WIREs Comp. Mol. Sci.*, 2022, **12**, 12753.
- [7] C. Lee, W. Yang and R. G. Parr, *Phys. Rev. B: Condens. Matter Mater. Phys.*, 1988, **37**, 785–789.
- [8] B. Miehlich, A. Savin, H. Stoll and H. Preuss, *Chem. Phys. Lett.*, 1989, **157**, 200–206.
- [9] A. D. Becke, *J. Chem. Phys.*, 1993, **98**, 5648–5652.
- [10] F. Weigend and R. Ahlrichs, *Phys. Chem. Chem. Phys.*, 2005, **7**, 3297–3305.
- [11] F. Neese, F. Wennmohs, A. Hansen and U. Becker, *Chem. Phys.*, 2009, **356**, 98–109.
- [12] R. Izsák and F. Neese, *J. Chem. Phys.*, 2011, **135**, 144105.
- [13] F. Weigend, *Phys. Chem. Chem. Phys.*, 2006, **8**, 1057–1065.
- [14] D. A. Pantazis and F. Neese, *J. Chem. Theory Comput.*, 2009, **5**, 2229–2238.
- [15] D. A. Pantazis, X.-Y. Chen, C. R. Landis and F. Neese, *J. Chem. Theory Comput.*, 2008, **4**, 908–919.
- [16] D. A. Pantazis and F. Neese, *Theor. Chem. Acc.*, 2012, **131**, 89.
- [17] D. A. Pantazis and F. Neese, *J. Chem. Theory Comput.*, 2011, **7**, 677–684.
- [18] C. van Wüllen, *J. Chem. Phys.*, 1998, **109**, 392–399.
- [19] E. van Lenthe, E. J. Baerends and J. G. Snijders, *J. Chem. Phys.*, 1993, **99**, 4597–4610.
- [20] S. Miertuš, E. Scrocco and J. Tomasi, *Chem. Phys.*, 1981, **55**, 117–129.
- [21] V. Barone and M. Cossi, *J. Phys. Chem. A*, 1998, **102**, 1995–2001.
- [22] S. Grimme, J. Antony, S. Ehrlich and H. Krieg, *J. Chem. Phys.*, 2010, **132**, 154104.
- [23] S. Grimme, S. Ehrlich and L. Goerigk, *J. Comput. Chem.*, 2011, **32**, 1456–1465.
- [24] F. Plasser, *J. Chem. Phys.*, 2020, **152**, 84108.
- [25] B. O. Roos, P. R. Taylor and P. E. M. Sigbahn, *Chem. Phys.*, 1980, **48**, 157–173.
- [26] P. E. M. Siegbahn, J. Almlöf, A. Heiberg and B. O. Roos, *J. Chem. Phys.*, 1981, **74**, 2384–2396.
- [27] C. Angeli, R. Cimraglia, S. Evangelisti, T. Leininger and J.-P. Malrieu, *J. Chem. Phys.*, 2001, **114**, 10252–10264.
- [28] C. Angeli, R. Cimraglia and J.-P. Malrieu, *Chem. Phys. Lett.*, 2001, **350**, 297–305.
- [29] C. Angeli, R. Cimraglia and J.-P. Malrieu, *J. Chem. Phys.*, 2002, **117**, 9138–9153.
- [30] K. Pierloot, *Int. J. Quantum Chem.*, 2011, **111**, 3291–3301.
- [31] STOE & Cie, X-Area, STOE & Cie GmbH, Darmstadt, Germany.
- [32] R. H. Blessing, *Acta Crystallogr. A* 1995, **51**, 33–38.
- [33] A. L. Spek, *Acta Crystallogr. D* 2009, **65**, 148–155.
- [34] J. Koziskova, F. Hahn, J. Richter and J. Kožíšek, *Acta Chim. Slovaca* 2016, **9**, 136–140.
- [35] STOE & Cie, X-Area LANA, STOE & Cie GmbH, Darmstadt, Germany.
- [36] G. M. Sheldrick, *Acta Crystallogr., Sect. A: Found. Adv.*, 2015, **71**, 3–8.
- [37] G. M. Sheldrick, *Acta Crystallogr., Sect. C: Struct. Chem.*, 2015, **71**, 3–8.
- [38] G. M. Sheldrick, *Acta Crystallogr., Sect. A: Found. Crystallogr.*, 2008, **64**, 112–122.
- [39] C. B. Hübschle, G. M. Sheldrick and B. Dittrich, *J. Appl. Crystallogr.*, 2011, **44**, 1281–1284.
- [40] P.-S. Wang, C.-K. Liang and M.-k. Leung, *Tetrahedron*, 2005, **61**, 2931–2939.

- [41] S. Balamurugan, S. Ganesan, S. Kamaraj, V. Mathew, J. Kim, N. Arumugam and A. I. Almansour, *Optical Materials*, 2022, **125**, 112082.
- [42] R. D. Köhn, A. G. N. Coxon, S. Chunawat, C. Heron, S. Mihan, C. L. Lyall, S. B. Reeksting and G. Kociok-Köhn, *Polyhedron*, 2020, **185**, 114572.
- [43] F. Reichenauer, C. Wang, C. Förster, P. Boden, N. Ugur, R. Báez-Cruz, J. Kalmbach, L. M. Carrella, E. Rentschler, C. Ramanan, G. Niedner-Schatteburg, M. Gerhards, M. Seitz, U. Resch-Genger and K. Heinze, *J. Am. Chem. Soc.*, 2021, **143**, 11843–11855.
- [44] S. Otto, M. Grabolle, C. Förster, C. Kreitner, U. Resch-Genger, K. Heinze, *Angew. Chem. Int. Ed. Engl.*, 2015, **54**, 11572–11576.
